# Supplementary material for: A N,N′-dioxide/Mg(OTf)2 complex catalyzed enantioselective α-addition of isocyanides to alkylidene malonates
Source: PubMed Central journal article supplement — Chem Sci. 2016 Apr 22;7(7):4736–40. doi: 10.1039/c6sc00689b (PMC6016448; doi:10.1039/c6sc00689b), 2016-04-22

## Supporting Information

### Contents:

|                                                                                           |    |
|-------------------------------------------------------------------------------------------|----|
| 1. General remarks.....                                                                   | 2  |
| 2. Preparation of the compound $\alpha$ -isocyanoacetamides <b>2</b> .....                | 2  |
| 3. Typical experimental procedure for the catalytic asymmetric reaction.....              | 3  |
| 4. X-ray crystallographic structure of the product <b>3ae</b> and proposed mechanism..... | 3  |
| 5. Optimization of the reaction conditions.....                                           | 9  |
| 6. Synthetic transformation of the products.....                                          | 11 |
| 7. The analytical and spectral characterization data of the products.....                 | 13 |
| 8. References.....                                                                        | 43 |
| 9. Copies of NMR spectra.....                                                             | 44 |
| 10. Copy of CD spectra.....                                                               | 89 |

## 1. General remarks

<sup>1</sup>H NMR spectra were recorded on commercial instruments (400 MHz). Chemical shifts were reported in ppm from tetramethylsilane with the solvent resonance as the internal standard (CDCl<sub>3</sub>, δ = 7.26). Spectra are reported as follows: chemical shift (δ ppm), multiplicity (s = singlet, d = doublet, t = triplet, q = quartet, m = multiplet), coupling constants (Hz), integration, and assignment. <sup>13</sup>C NMR spectra were collected on commercial instruments (100 MHz) with complete proton decoupling. Chemical shifts are reported in ppm from the tetramethylsilane with the solvent resonance as internal standard (CDCl<sub>3</sub>, δ = 77.0). The enantiomeric excess was determined by HPLC analysis employing a chiral stationary phase column specified in the individual experiment, by comparing the samples with the appropriate racemic mixtures. Optical rotations were measured on a commercial polarimeter and reported as follows: [α]<sub>D</sub><sup>T</sup> (c = g/100 mL, solvent). HR-ESIMS spectra were recorded using a commercial apparatus and methanol or acetonitrile was used to dissolve the sample. Unless otherwise indicated, reagents obtained from commercial sources were used without further purification. Solvents were dried and distilled prior to use according to the standard methods. The *N,N'*-dioxides were prepared according to the previous reports.<sup>1</sup> All racemic products were obtained by using Mg(OTf)<sub>2</sub> (10 mol%) in concert with racemic *N,N'*-dioxide ligand (L-PiPr<sub>2</sub>, 10 mol%) as the catalyst. Starting materials of alkylidene malonates **1** were prepared according to reported procedure.<sup>2</sup>

## 2. Preparation of the compound α-isocyanoacetamides **2**

The α-isocyanoacetamide substrates were synthesized by the procedure in the literature.<sup>3</sup>

### 2.1 Method A: Preparation of α-isocyanoacetamides **2a**, **2b**, **2d-2h**.

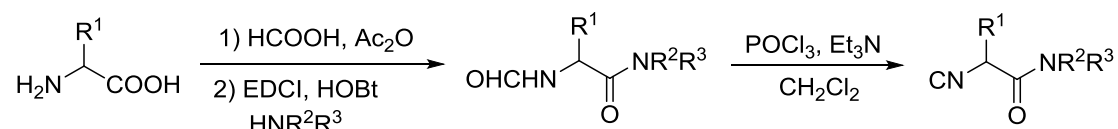

Acetic anhydride (17.0 mL, 180.2 mmol, 7.2 equiv) was added dropwise to a solution of amino acid (25.0 mmol, 1.0 equiv) in HCOOH (50.0 mL) at 0 °C. After the addition was complete, the reaction mixture was stirred at r.t. for an additional 1 h. Ice-water (20.0 mL) was added and the mixture was concentrated at reduced pressure to give the analytically pure white crystalline *N*-formyl amino acid.

To a solution of *N*-formyl amino acid (19.0 mmol, 1.0 equiv) and HNR<sup>2</sup>R<sup>3</sup> (22.9 mmol, 1.2 equiv) in CH<sub>2</sub>Cl<sub>2</sub> (50.0 mL) were added Et<sub>3</sub>N (3.2 mL, 23.2 mmol, 1.2 equiv), HOBt (3.11 g, 23.0 mmol, 1.2 equiv) and EDCI (4.41 g, 23.0 mmol, 1.2 equiv) successively and the reaction mixture was stirred for 24 h at r.t. The reaction mixture was diluted with sat. NH<sub>4</sub>Cl and extracted with CH<sub>2</sub>Cl<sub>2</sub>. The organic layer was washed with brine, dried over anhyd Na<sub>2</sub>SO<sub>4</sub> and concentrated. The residue was purified by flash column chromatography on silica gel (eluent: petroleum ether–EtOAc, 1:1 then EtOAc) to give the amide.

A stirred solution of amide (18.5 mmol, 1.0 equiv) and Et<sub>3</sub>N (12.8 mL, 92.0 mmol, 5.0 equiv) in CH<sub>2</sub>Cl<sub>2</sub> (90.0 mL) was cooled to -30 °C. Phosphorus oxychloride (2.6 mL, 27.5 mmol, 1.5 equiv) was added dropwise and the reaction mixture was stirred for 3 h at -30 °C. An aq sat solution of Na<sub>2</sub>CO<sub>3</sub> was introduced dropwise so that the temperature of mixture was maintained at -30 °C. The mixture was stirred for 0.5 h and raised to r.t. The aqueous layer was separated and extracted with CH<sub>2</sub>Cl<sub>2</sub>. The organic extracts were combined, washed with brine, dried over anhyd Na<sub>2</sub>SO<sub>4</sub> and evaporated under reduced pressure. The residue was purified by flash column chromatography on silica gel to provide the isocyanide.

## 2.2 Method B: Preparation of $\alpha$ -isocyanoacetamide **2c** and **2i**

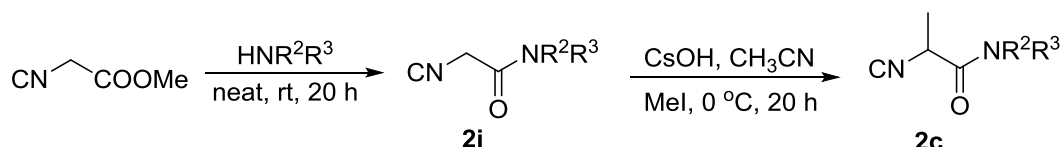

To methyl  $\alpha$ -isocyanoacetate (4.4 mmol) was added morpholine (10.3 mmol, 2.3 equiv) and the reaction mixture was stirred at r.t. for 24 h. The crude material was purified by flash chromatography (SiO<sub>2</sub>, EtOAc–petroleum ether = 2:1) to afford  $\alpha$ -isocyanoacetamide **2i**.

To a dry test tube containing CsOH H<sub>2</sub>O (0.34 mmol, 1.7 equiv) were added, under argon atmosphere, a solution of isocyano acetamide **2i** (0.20 mmol) in MeCN (1.0 mL) and MeI (0.21 mmol) at 0 °C. The resulting reaction mixture was stirred at 0 °C. When the reaction was deemed complete, the volatile was removed under reduced pressure. Purification of the crude product by flash chromatography (silica gel) afforded the desired product  $\alpha$ -isocyanoacetamide **2c**.

## 3. Typical experimental procedure for the catalytic asymmetric reaction

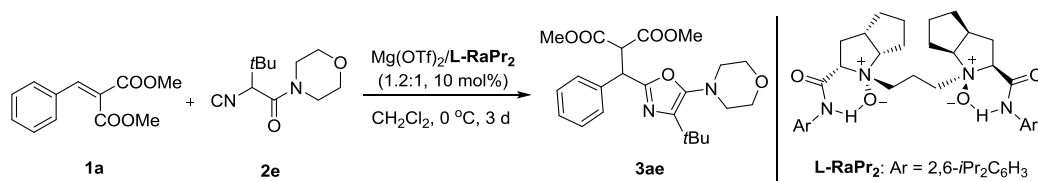

A dry reaction tube was charged with Mg(OTf)<sub>2</sub> (0.012 mmol), **L-RaPr<sub>2</sub>** (0.01 mmol) and dimethyl 2-benzylidenemalonate **1a** (0.1 mmol). CH<sub>2</sub>Cl<sub>2</sub> (1.0 mL) was added, and the mixture was stirred at 30 °C for 0.5 h. Subsequently,  $\alpha$ -isocyanoacetamide **2e** (0.15 mmol, 1.5 equiv) was added at 0 °C in one portion. After being stirred at 0 °C for 3 days, the crude reaction mixture was purified by flash chromatography on silica gel (petroleum ether/ethyl acetate = 7/1) to afford the desired product **3ae** as a white solid.

## 4. X-ray crystallographic structure of the product **3ae** and proposed mechanism

The configuration of **3ae** was determined to be *R* by single-crystal X-ray crystallographic analysis. Based on previous reports as well, a possible catalytic model has been proposed.

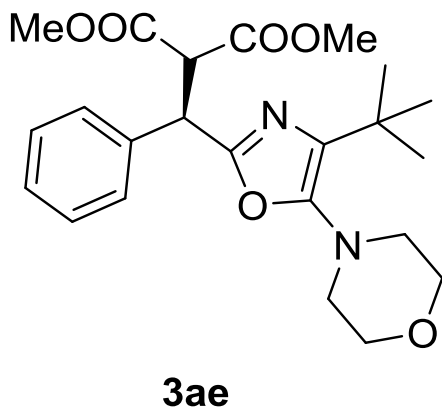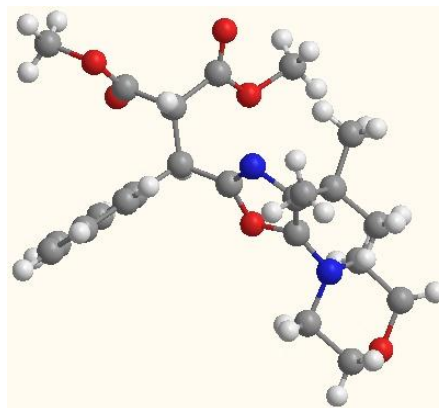

Single crystal of **3ae** [C<sub>23</sub>H<sub>30</sub>N<sub>2</sub>O<sub>6</sub>] was obtained from the mixed solvents of ethyl acetate and petroleum ether. CCDC 1416058 contains the supplementary crystallographic data which can be obtained free of charge from The Cambridge Crystallographic Data Center via [www.ccdc.cam.ac.uk/data\\_request/cif](http://www.ccdc.cam.ac.uk/data_request/cif).

a) Proposed catalytic cycle

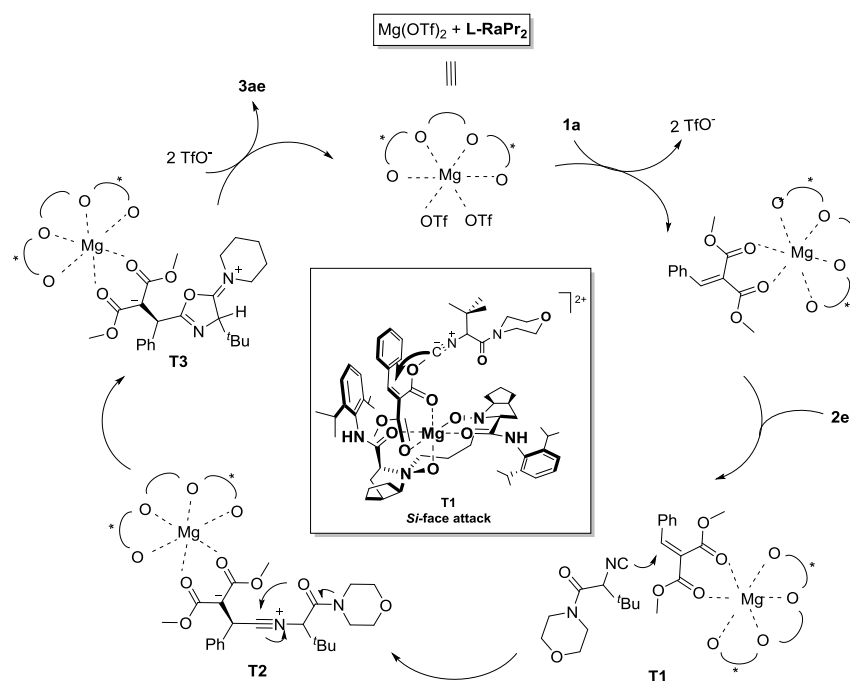

b) HRMS and <sup>1</sup>H NMR analysis of substrates and catalyst

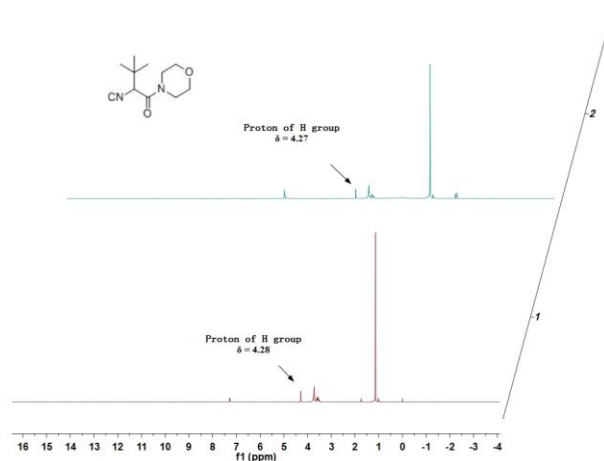

(1) **2e** in  $\text{CDCl}_3$ ; (2)  $\text{Mg}(\text{OTf})_2/\text{L-RaPr}_2/\mathbf{2e}$  (1.2/1/1) in  $\text{CDCl}_3$ .

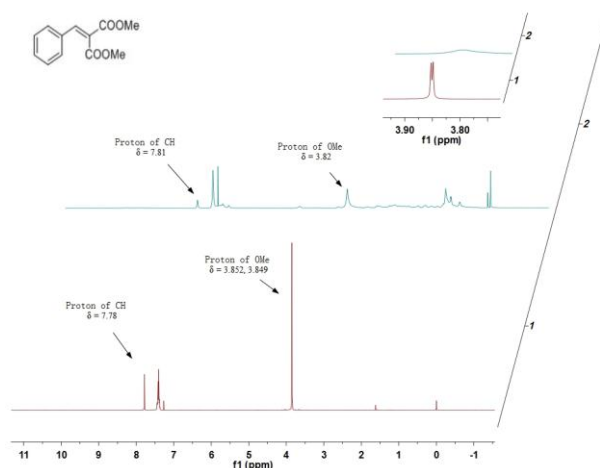

(1) **1a** in  $\text{CDCl}_3$ ; (2)  $\text{Mg}(\text{OTf})_2/\text{L-RaPr}_2/\mathbf{1a}$  (1.2/1/1) in  $\text{CDCl}_3$ .

The mixture of **L-RaPr**<sub>2</sub> and  $\text{Mg}(\text{OTf})_2$  (1:1)

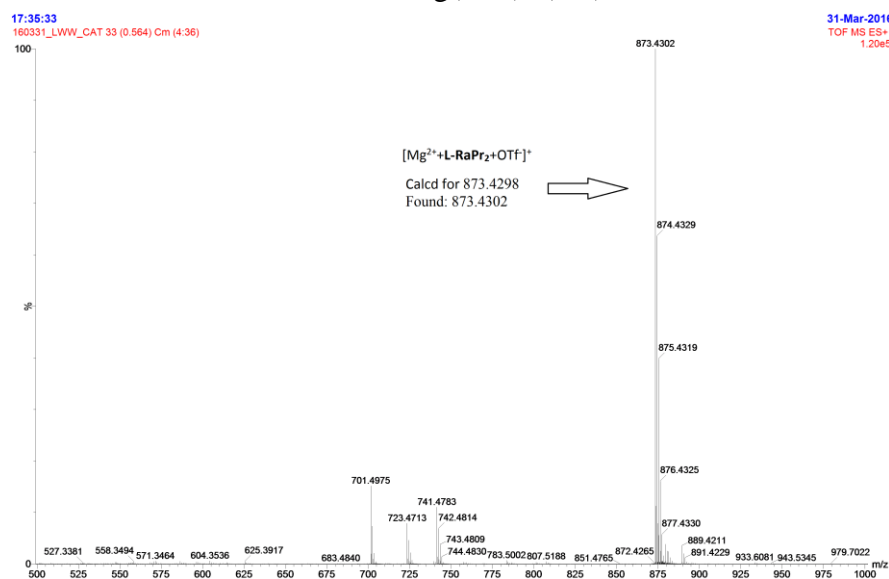

## The mixture of **L-RaPr**<sub>2</sub>, Mg(OTf)<sub>2</sub> and **1a** (1:1:1)

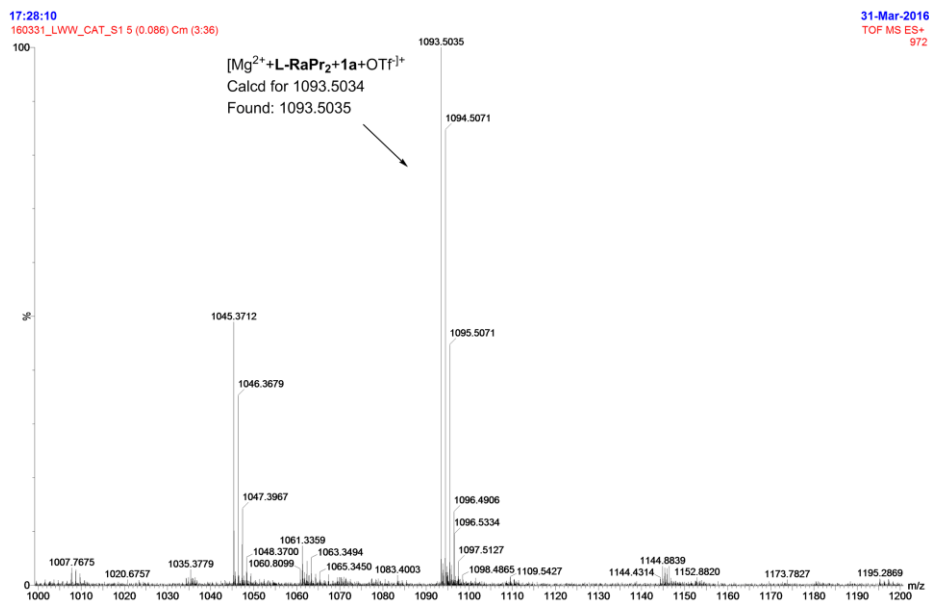

As shown by the <sup>1</sup>H NMR spectra, the proton signal of **1a** was obviously affected by catalyst Mg(OTf)<sub>2</sub>/L-RaPr<sub>2</sub>. ESI-MS analysis confirmed the coordination of the substrate **1a** to the catalyst.

### c) Deuterium labeling studies

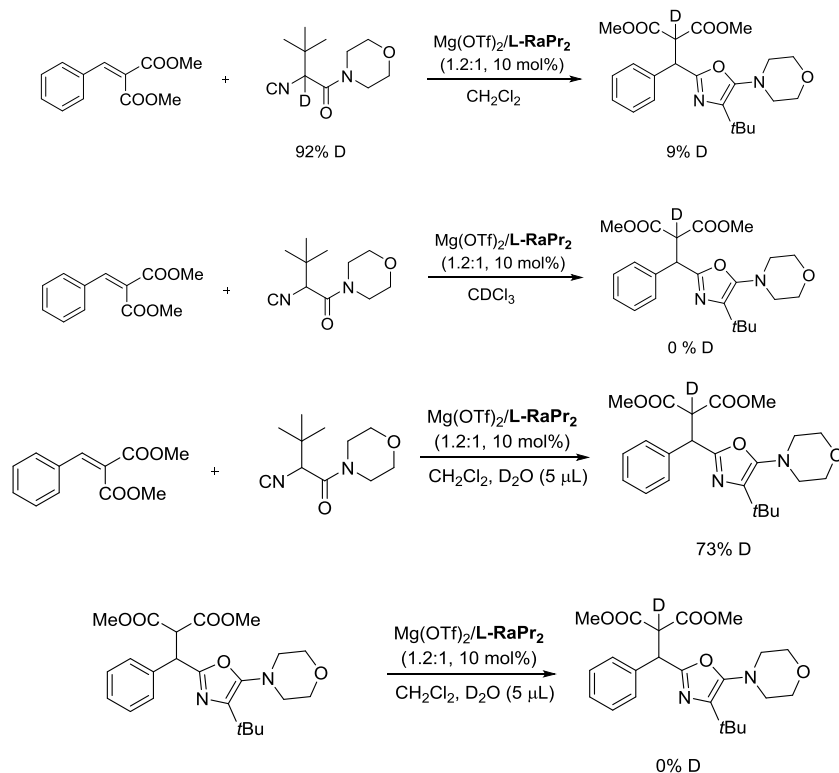

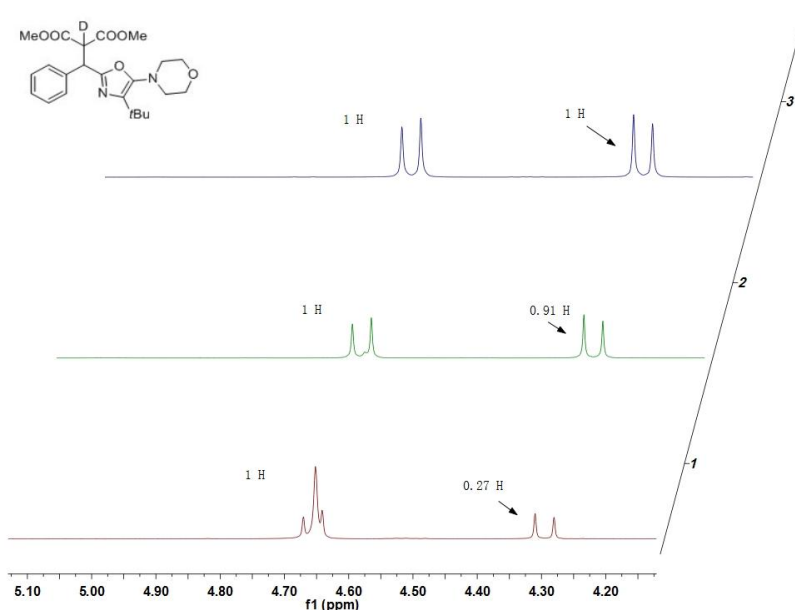

(1) 73% D; (2) 9% D; (3) 0% D.

As shown by the deuterium labeling studies, the use of D- $\alpha$ -isocyanoacetamide led to surprisingly low deuterium labeling on the product (9%), the use of  $\text{CDCl}_3$  resulted in no deuterium labeling on the product (0%), but a small amount of  $\text{D}_2\text{O}$  resulted in significant deuterium labeling on the product (73%). This interesting observation suggests that proton transfer is facilitated by a trace amount of water.

d)  $^1\text{H}$  NMR monitoring reaction process

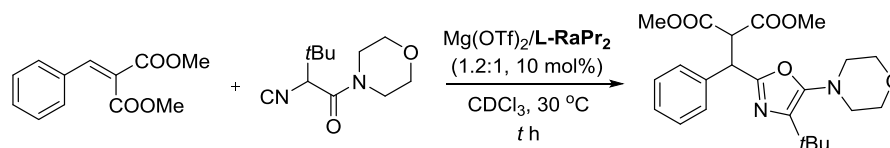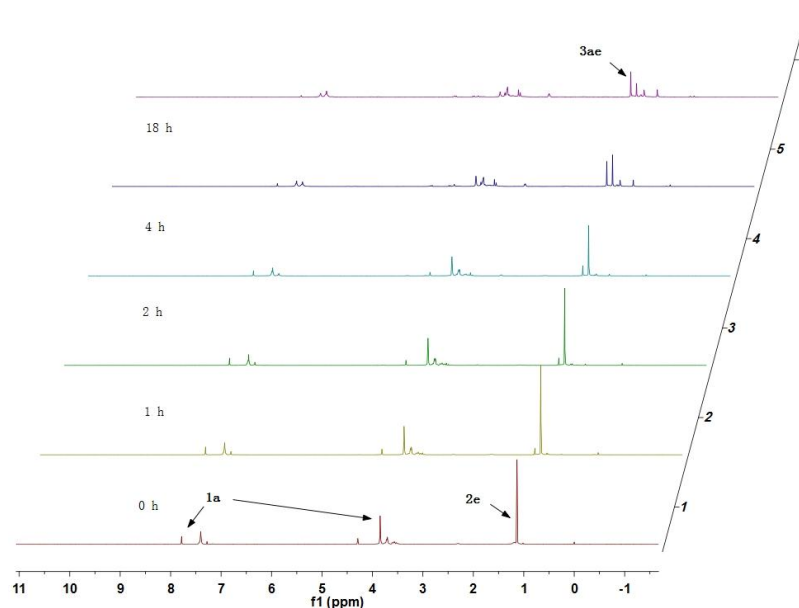

(1) 0 h. (2) 1 h. (3) 2 h. (4) 4 h. (5) 18 h. (6) 24 h.

As shown by  $^1\text{H}$  NMR of the reaction mixture, no obvious intermediates were detected.

e) Operando IR experiments

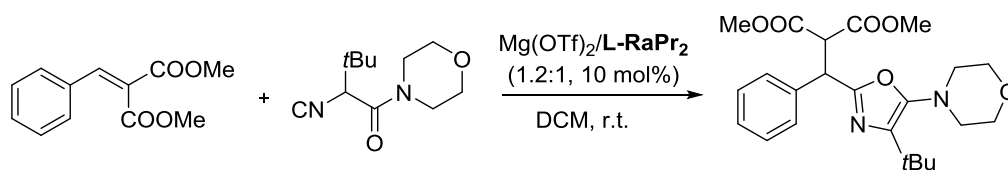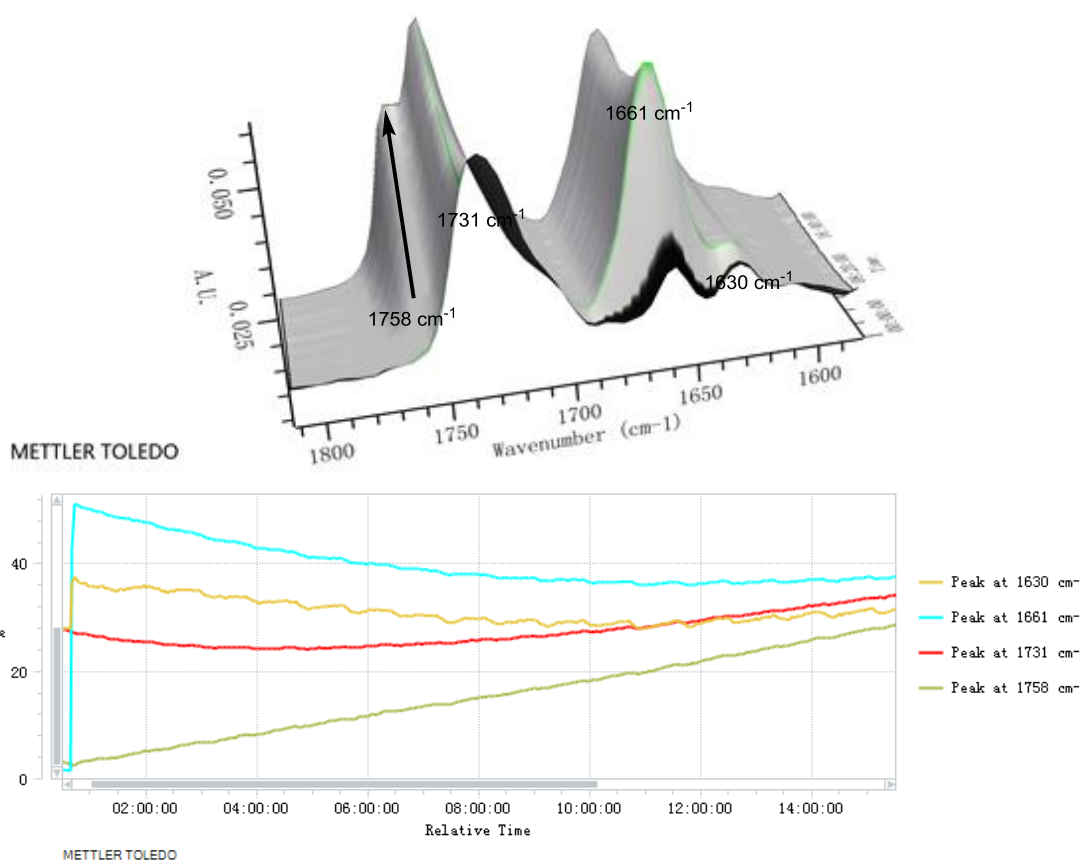



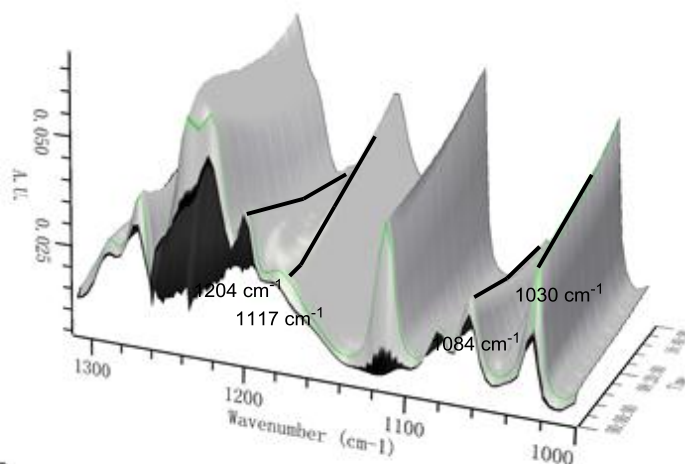

METTLER TOLEDO

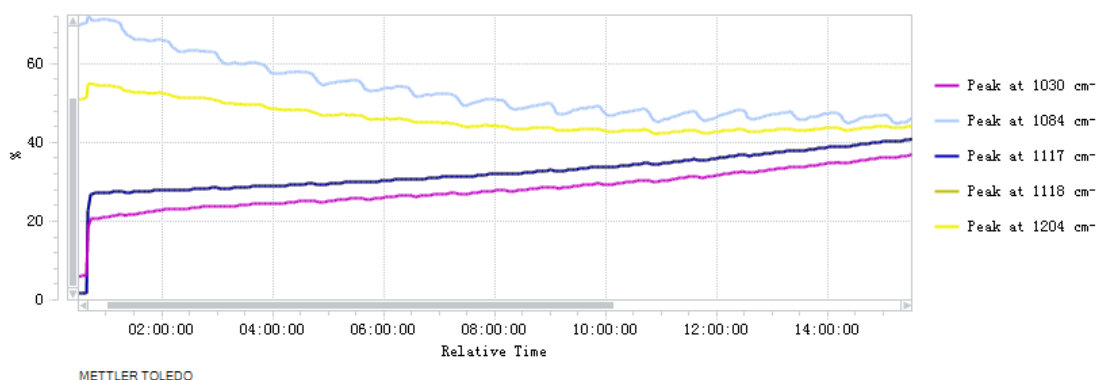

As the peak at  $1661\text{ cm}^{-1}$  related to  $\alpha$ -isocyanoacetamide **2e**,  $1630$ ,  $1204$ ,  $1084\text{ cm}^{-1}$  related to methyl 2-benzylidenemalonate (**1a**), and  $1758$ ,  $1117$ ,  $1030\text{ cm}^{-1}$  related to the product. As show by the operando IR experiments, the product was formed gradually with disappearance of the substrates, and no intermediates were detected, indicating that the reaction must proceed by a concerted pathway.

## 5. Optimization of the Reaction Conditions

### 5.1 Screening of the metal salts and ligands

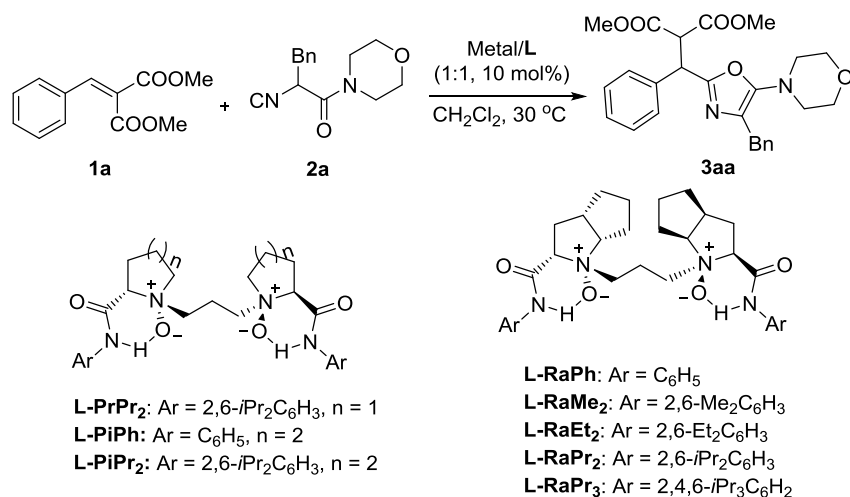

| Entry <sup>[a]</sup> | Metal                                                 | Ligand                    | Yield [%] <sup>[b]</sup> | ee [%] <sup>[c]</sup> |
|----------------------|-------------------------------------------------------|---------------------------|--------------------------|-----------------------|
| 1                    | Zn(OTf) <sub>2</sub>                                  | <b>L-PiPr<sub>2</sub></b> | N.R                      | -                     |
| 2                    | Cu(OTf) <sub>2</sub>                                  | <b>L-PiPr<sub>2</sub></b> | N.R                      | -                     |
| 3                    | Ni(BF <sub>4</sub> ) <sub>2</sub> · 6H <sub>2</sub> O | <b>L-PiPr<sub>2</sub></b> | N.R                      | -                     |
| 4                    | Mg(OTf) <sub>2</sub>                                  | <b>L-PiPr<sub>2</sub></b> | 93                       | 70                    |
| 5                    | Mg(OTf) <sub>2</sub>                                  | <b>L-PiPh</b>             | 99                       | -6                    |
| 6                    | Mg(OTf) <sub>2</sub>                                  | <b>L-PrPr<sub>2</sub></b> | 72                       | 76                    |
| 7                    | Mg(OTf) <sub>2</sub>                                  | <b>L-RaPr<sub>2</sub></b> | 99                       | 82                    |
| 8                    | Mg(OTf) <sub>2</sub>                                  | <b>L-RaPh</b>             | 99                       | 0                     |
| 9                    | Mg(OTf) <sub>2</sub>                                  | <b>L-RaMe<sub>2</sub></b> | 99                       | 2                     |
| 10                   | Mg(OTf) <sub>2</sub>                                  | <b>L-RaEt<sub>2</sub></b> | 94                       | 58                    |
| 11                   | Mg(OTf) <sub>2</sub>                                  | <b>L-RaPr<sub>3</sub></b> | 99                       | 50                    |

[a] Unless specified otherwise, reactions were performed with Metal/L (1:1, 10 mol%), **1a** (0.1 mmol), **2** (0.15 mmol) in 1.0 mL CH<sub>2</sub>Cl<sub>2</sub>. [b] Isolated yield. [c] Enantiomeric excess determined by HPLC analysis on a chiral stationary phase.

## 5.2 Screening of the solvents and reaction temperature

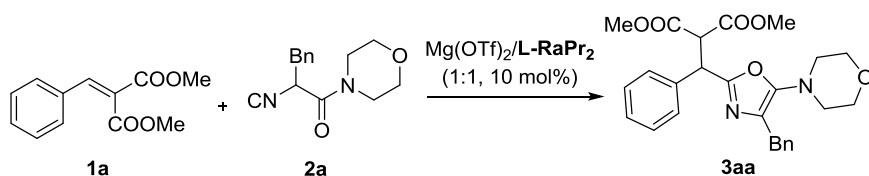

| Entry <sup>[a]</sup> | solvent                              | T [°C] | T [h] | Yield [%] <sup>[b]</sup> | ee [%] <sup>[c]</sup> |
|----------------------|--------------------------------------|--------|-------|--------------------------|-----------------------|
| 1                    | CH <sub>2</sub> Cl <sub>2</sub>      | 30     | 24    | 99                       | 82                    |
| 2                    | THF                                  | 30     | 24    | trace                    | -                     |
| 3                    | Et <sub>2</sub> O                    | 30     | 24    | 87                       | 72                    |
| 4                    | Toluene                              | 30     | 24    | 71                       | 69                    |
| 5                    | EtOAc                                | 30     | 24    | N.R                      | -                     |
| 6                    | CH <sub>3</sub> CN                   | 30     | 24    | 22                       | 80                    |
| 7                    | CHCl <sub>3</sub>                    | 30     | 24    | 84                       | 78                    |
| 8                    | ClCH <sub>2</sub> CH <sub>2</sub> Cl | 30     | 24    | 96                       | 78                    |
| 9                    | Cl <sub>2</sub> CHCH <sub>2</sub> Cl | 30     | 24    | 88                       | 77                    |

|    |                                     |     |    |    |    |
|----|-------------------------------------|-----|----|----|----|
| 10 | ClCH <sub>2</sub> CHCl <sub>2</sub> | 30  | 24 | 61 | 74 |
| 11 | Cl <sub>3</sub> CCH <sub>3</sub>    | 30  | 24 | 86 | 76 |
| 12 | CH <sub>2</sub> Cl <sub>2</sub>     | 0   | 48 | 63 | 86 |
| 13 | CH <sub>2</sub> Cl <sub>2</sub>     | -10 | 48 | 16 | 86 |

[a] Unless specified otherwise, reactions were performed with Mg(OTf)<sub>2</sub>/**L-RaPr**<sub>2</sub> (1:1, 10 mol%), **1a** (0.1 mmol), **2** (0.15 mmol) in 1.0 mL solvent. [b] Isolated yield. [c] Enantiomeric excess determined by HPLC analysis on a chiral stationary phase.

### 5.3 Other conditions

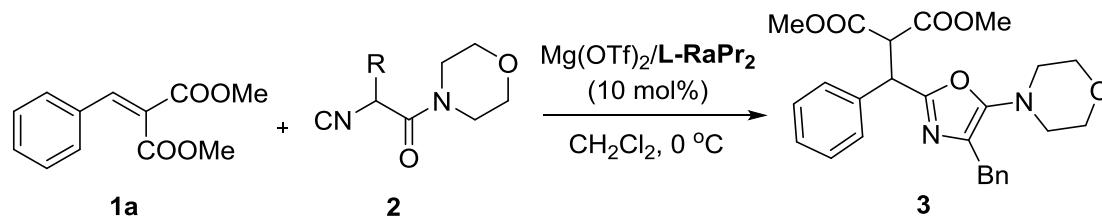

| Entry <sup>[a]</sup> | R                        | M/L   | T [h] | Yield [%] <sup>[b]</sup> | ee [%] <sup>[c]</sup> |
|----------------------|--------------------------|-------|-------|--------------------------|-----------------------|
| 1                    | Bn( <b>2a</b> )          | 1:1   | 48    | 63                       | 86                    |
| 2                    | Ph( <b>2b</b> )          | 1:1   | 48    | 86                       | 87                    |
| 3                    | Ph( <b>2b</b> )          | 1:2   | 60    | 79                       | 87                    |
| 4                    | Ph( <b>2b</b> )          | 1:1.5 | 60    | 80                       | 87                    |
| 5                    | Ph( <b>2b</b> )          | 1:1.2 | 60    | 85                       | 87                    |
| 6                    | Ph( <b>2b</b> )          | 1.2:1 | 60    | 99                       | 87                    |
| 7                    | Ph( <b>2b</b> )          | 1.5:1 | 60    | 99                       | 86                    |
| 8                    | Ph( <b>2b</b> )          | 2:1   | 60    | 99                       | 86                    |
| 9                    | Me( <b>2c</b> )          | 1:1   | 72    | 61                       | 86                    |
| 10                   | <i>i</i> Pr( <b>2d</b> ) | 1:1   | 72    | 91                       | 89                    |
| 11                   | <i>t</i> Bu( <b>2e</b> ) | 1:1   | 72    | 75                       | 92                    |
| 12                   | <i>t</i> Bu( <b>2e</b> ) | 1:1.1 | 72    | 46                       | 92                    |
| 13                   | <i>t</i> Bu( <b>2e</b> ) | 1.1:1 | 72    | 83                       | 92                    |
| 14                   | <i>t</i> Bu( <b>2e</b> ) | 1.2:1 | 72    | 91                       | 92                    |
| 15                   | <i>t</i> Bu( <b>2e</b> ) | 1.3:1 | 72    | 91                       | 92                    |
| 16                   | <i>t</i> Bu( <b>2e</b> ) | 1.4:1 | 72    | 90                       | 91                    |
| 17                   | <i>t</i> Bu( <b>2e</b> ) | 1.5:1 | 72    | 95                       | 91                    |

[a] Unless specified otherwise, reactions were performed with Mg(OTf)<sub>2</sub>/**L-RaPr**<sub>2</sub> (10 mol%), **1a** (0.1 mmol), **2** (0.15 mmol) in 1.0 mL solvent. [b] Isolated yield. [c] Enantiomeric excess determined by HPLC analysis on a chiral stationary phase.

## 6. Synthetic transformation of the products

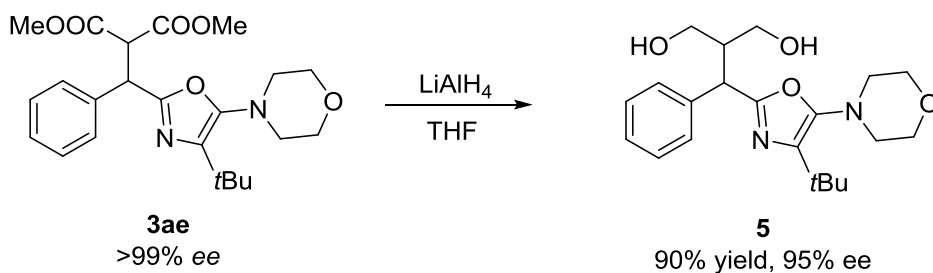

To a solution of adduct **3ae** (0.2 mmol, 1.0 equiv) in THF (2.0 mL) was added  $\text{LiAlH}_4$  (38.0 mg, 5.0 equiv) at 0 °C. The mixture was allowed to stir at room temperature for 2 h. Excess of  $\text{LiAlH}_4$  was quenched with  $\text{NH}_4\text{Cl}$  (sat.). The mixture was extracted with EtOAc, and the organic layer was dried over anhydrous  $\text{Na}_2\text{SO}_4$  and then was evaporated by rotary evaporator. The residue was purified by column chromatography on silica gel (petroleum ether/ethyl acetate = 1/1) to afford **5** (67.2 mg, 90% yield) as a yellow oil.

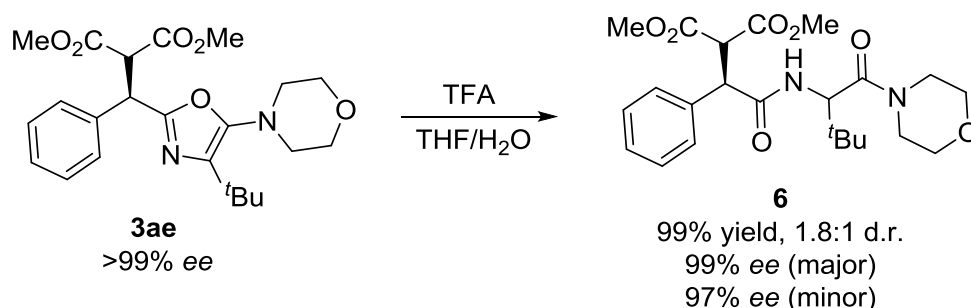

To the solution of 5-aminoxazole **3ae** (0.3 mmol, 1.0 equiv) in THF/ $\text{H}_2\text{O}$  (4:1, 0.05 M), TFA (50 equiv) was added and the reaction stirred at room temperature for 24 h. The reaction mixture was quenched with  $\text{KHCO}_3$  (sat.) and extracted with EtOAc, dried with  $\text{Na}_2\text{SO}_4$ , filtered, and concentrated in vacuo. This crude mixture was then immediately purified by flash chromatography on silica gel (petroleum ether/ethyl acetate = 1/1) to afford the dipeptide **6**.

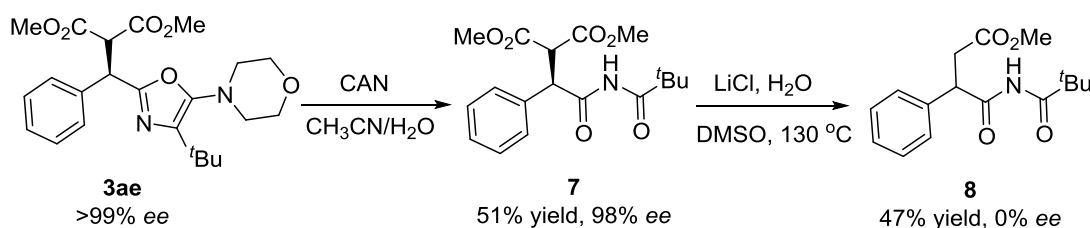

To the solution of 5-aminoxazole **3ae** (0.3 mmol, 1.0 equiv) in  $\text{CH}_3\text{CN}/\text{H}_2\text{O}$  (9:1, 0.05 M), ceric ammonium nitrate (4.0 equiv) was added. The reaction was allowed to stir until completion via TLC and then diluted with ethyl acetate and water. After extracting with ethyl acetate, the organic fractions were combined, washed with  $\text{NaHCO}_3$  (sat.) and brine, dried with  $\text{MgSO}_4$ , filtered, and concentrated in vacuo. This crude mixture was then immediately purified by flash chromatography on silica gel (petroleum ether/ethyl acetate = 3/1) to afford the imide **7**.

To the solution of imide **7** (0.4 mmol, 1.0 equiv) in DMSO (0.5 M) was added LiCl (2.1 equiv) and  $\text{H}_2\text{O}$  (1.1 equiv). The reaction was allowed to stir at 130 °C for 5h, and then quenched with EtOAc/ $\text{H}_2\text{O}$ , extracted with EtOAc, dried with  $\text{Na}_2\text{SO}_4$ , filtered, and concentrated in vacuo. This crude mixture was then immediately purified by flash chromatography on silica gel (petroleum

ether/ethyl acetate = 4/1) to afford the product **8**.

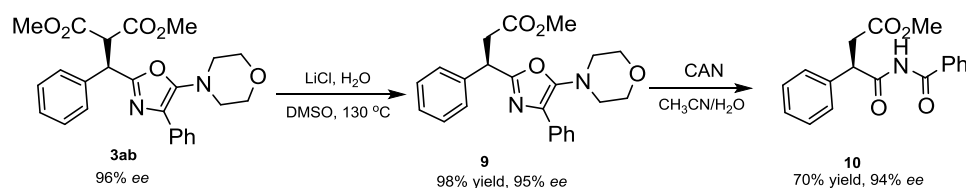

To the solution of 5-aminooxazole **3ab** (0.8 mmol, 1.0 equiv) in DMSO (0.5 M) was added LiCl (2.1 equiv) and H<sub>2</sub>O (1.1 equiv). The reaction was allowed to stir at 130 °C for 5h, and then quenched with EtOAc/H<sub>2</sub>O, extracted with EtOAc, dried with Na<sub>2</sub>SO<sub>4</sub>, filtered, and concentrated in vacuo. This crude mixture was then immediately purified by flash chromatography on silica gel (petroleum ether/ethyl acetate = 4/1) to afford the product **9**.

To the solution of **9** (0.3 mmol, 1.0 equiv) in CH<sub>3</sub>CN/H<sub>2</sub>O (9:1, 0.05 M), ceric ammonium nitrate (4.0 equiv) was added. The reaction was allowed to stir until completion via TLC and then diluted with ethyl acetate and water. After extracting with ethyl acetate, the organic fractions were combined, washed with NaHCO<sub>3</sub> (sat.) and brine, dried with MgSO<sub>4</sub>, filtered, and concentrated in vacuo. This crude mixture was then immediately purified by flash chromatography on silica gel (petroleum ether/ethyl acetate = 3/1) to afford the imide **10**.

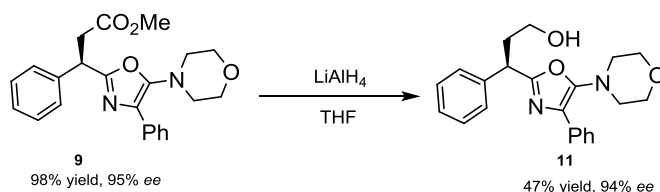

To a solution of adduct **9** (0.2 mmol, 1.0 equiv) in THF (2.0 mL) was added LiAlH<sub>4</sub> (38.0 mg, 5.0 equiv) at 0 °C. The mixture was allowed to stir at room temperature for 2 h. Excess of LiAlH<sub>4</sub> was quenched with NH<sub>4</sub>Cl (sat.). The mixture was extracted with EtOAc, and the organic layer was dried over anhydrous Na<sub>2</sub>SO<sub>4</sub> and then was evaporated by rotary evaporator. The residue was purified by column chromatography on silica gel (petroleum ether/ethyl acetate = 2/1) to afford **11** as a yellow oil.

## 7. The analytical and spectral characterization data of the products

### dimethyl 2-((4-tert-butyl-5-morpholinooxazol-2-yl)(phenyl)methyl)malonate **3ae**

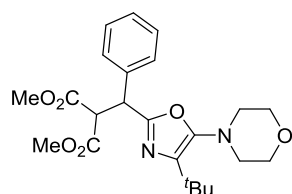

(C<sub>23</sub>H<sub>30</sub>N<sub>2</sub>O<sub>6</sub>) white solid; 91% yield, 92% ee. [α]<sub>D</sub><sup>20</sup> = -68.9 (c 1.36 in CH<sub>2</sub>Cl<sub>2</sub>). HPLC DAICEL CHIRALCEL ID, n-hexane/2-propanol = 80/20, flow rate = 1.0 mL/min, λ = 254 nm, retention time: 6.08 min (major), 8.60 min (minor). <sup>1</sup>H NMR (400 MHz, CDCl<sub>3</sub>) δ 7.30 – 7.10 (m, 5H), 4.65 (d, *J* = 11.8 Hz, 1H), 4.29 (d, *J* = 11.8 Hz, 1H), 3.72 – 3.54 (m, 7H), 3.40 (s, 3H), 2.91 – 2.71 (m, 4H), 1.18 (s, 9H). <sup>13</sup>C NMR (100 MHz, CDCl<sub>3</sub>) δ 166.95, 166.51, 156.34, 148.83, 135.64, 134.85, 127.59, 127.38, 126.70, 65.91, 55.48, 51.67, 51.47, 50.90, 44.16, 30.38, 28.59. ESI-HRMS: calcd for C<sub>23</sub>H<sub>30</sub>N<sub>2</sub>NaO<sub>6</sub><sup>+</sup> ([M+Na<sup>+</sup>]) 453.1996, found 453.2006.

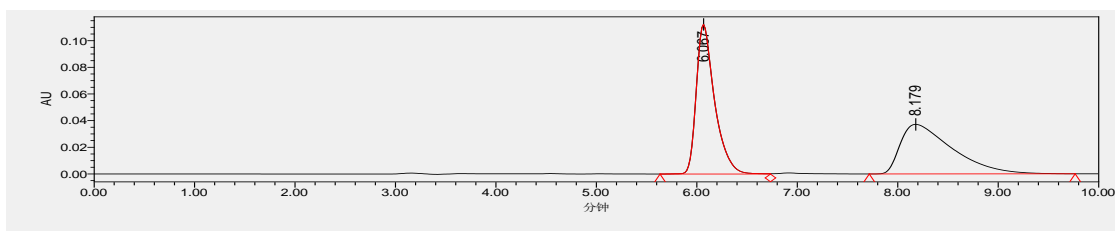

|   | Retention Time | Area    | % Area | Height |
|---|----------------|---------|--------|--------|
| 1 | 6.067          | 1421746 | 51.57  | 112225 |
| 2 | 8.179          | 1335127 | 48.43  | 37211  |

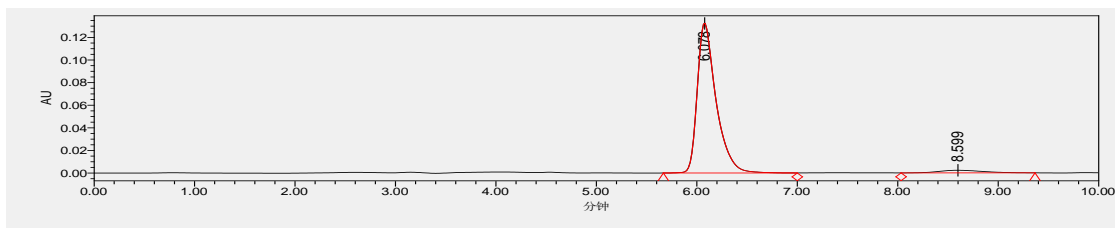

|   | Retention Time | Area    | % Area | Height |
|---|----------------|---------|--------|--------|
| 1 | 6.078          | 1722821 | 96.09  | 132664 |
| 2 | 8.599          | 70025   | 3.91   | 2309   |

### diethyl 2-((4-tert-butyl-5-morpholinooxazol-2-yl)(phenyl)methyl)malonate **3be**

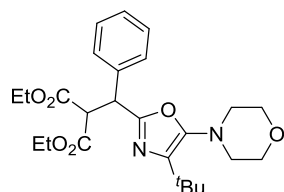

( $C_{25}H_{34}N_2O_6$ ) colorless oil; 71% yield, 91% *ee*.  $[\alpha]_D^{20} = -69.9$  (*c* 0.61 in  $CH_2Cl_2$ ). HPLC DAICEL CHIRALCEL ID, n-hexane/2-propanol = 90/10, flow rate = 1.0 mL/min,  $\lambda = 254$  nm, retention time: 7.15 min (minor), 7.83 min (major).  $^1H$  NMR (400 MHz,  $CDCl_3$ )  $\delta$  7.30 (dd,  $J = 7.0, 4.9$  Hz, 4H), 7.26 – 7.17 (m, 1H), 4.71 (d,  $J = 11.9$  Hz, 1H), 4.36 (d,  $J = 11.9$  Hz, 1H), 4.14 (q,  $J = 7.1$  Hz, 2H), 3.93 (q,  $J = 7.1$  Hz, 2H), 3.71 (dd,  $J = 5.4, 2.6$  Hz, 4H), 2.96 – 2.80 (m, 4H), 1.25 (s, 9H), 1.20 (t,  $J = 7.1$  Hz, 3H), 0.97 (t,  $J = 7.1$  Hz, 3H).  $^{13}C$  NMR (100 MHz,  $CDCl_3$ )  $\delta$  167.48, 167.23, 157.52, 149.74, 136.79, 135.92, 128.53, 127.63, 66.96, 61.57, 61.44, 56.75, 51.94, 45.14, 31.39, 29.63, 14.09, 13.71. ESI-HRMS: calcd for  $C_{25}H_{34}N_2NaO_6^+$  ( $[M+Na^+]$ ) 481.2309, found 481.2310.

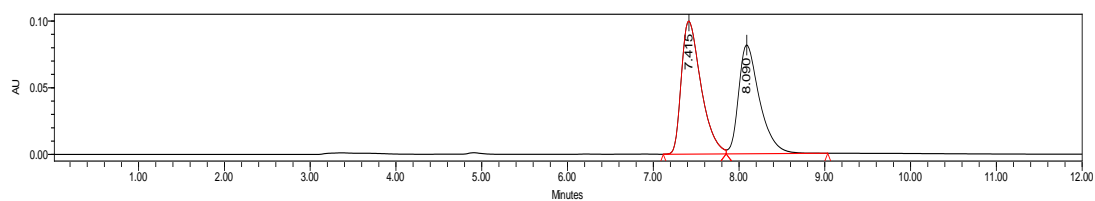

|   | Retention Time | Area    | % Area | Height |
|---|----------------|---------|--------|--------|
| 1 | 7.415          | 1584312 | 53.43  | 99774  |
| 2 | 8.090          | 1380736 | 46.57  | 81710  |

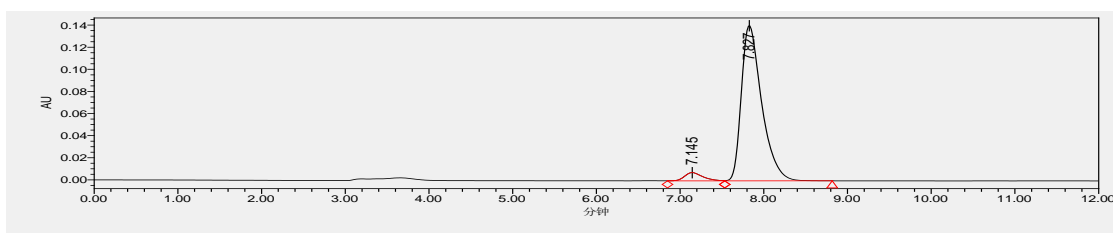

|   | Retention Time | Area    | % Area | Height |
|---|----------------|---------|--------|--------|
| 1 | 7.145          | 111397  | 4.50   | 7441   |
| 2 | 7.827          | 2363512 | 95.50  | 140517 |

**diisopropyl 2-((4-tert-butyl-5-morpholinooxazol-2-yl)(phenyl)methyl)malonate 3c**

CC(C)COC(=O)C(C1=CC=CC=C1)C2=CN(C3CCOCC3)C=C2C4C(C)C ( $C_{27}H_{38}N_2O_6$ ) colorless oil; 41% yield, 82% *ee*.  $[\alpha]_D^{20} = -66.8$  (*c* 0.37 in  $CH_2Cl_2$ ). HPLC DAICEL CHIRALCEL IE, n-hexane/2-propanol = 80/20, flow rate = 1.0 mL/min,  $\lambda = 254$  nm, retention time: 5.44 min (minor), 6.12 min (major).  $^1H$  NMR (400 MHz,  $CDCl_3$ )  $\delta$  7.35 – 7.26 (m, 1H), 7.25 – 7.20 (m, 4H), 4.97 (dt,  $J = 12.5, 6.3$  Hz, 1H), 4.77 (dt,  $J = 12.5, 6.3$  Hz, 1H), 4.69 (d,  $J = 12.0$  Hz, 1H), 4.33 (d,  $J = 12.0$  Hz, 1H), 3.72 (dd,  $J = 5.6, 3.1$  Hz, 4H), 2.94 – 2.82 (m, 4H), 1.25 (s, 9H), 1.22 (d,  $J = 6.3$  Hz, 3H), 1.14 (d,  $J = 6.3$  Hz, 3H), 1.07 (d,  $J = 6.3$  Hz, 3H), 0.87 (d,  $J = 6.3$  Hz, 3H).  $^{13}C$  NMR (100 MHz,  $CDCl_3$ )  $\delta$  166.94, 166.78, 157.68, 149.63, 136.89, 135.95, 128.62, 128.48, 127.55, 69.01, 68.95, 66.97, 57.02, 51.96, 44.97, 31.39, 29.65, 21.65, 21.50, 21.37, 21.18. ESI-HRMS: calcd for  $C_{27}H_{38}N_2NaO_6^+$  ( $[M+Na^+]$ ) 509.2622, found 509.2627.

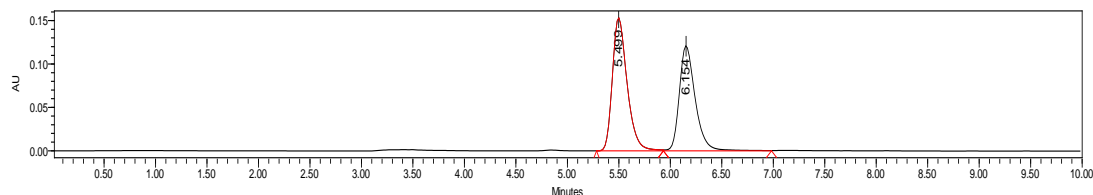

|   | Retention Time | Area    | % Area | Height |
|---|----------------|---------|--------|--------|
| 1 | 5.499          | 1529522 | 54.13  | 153376 |
| 2 | 6.154          | 1296133 | 45.87  | 121119 |

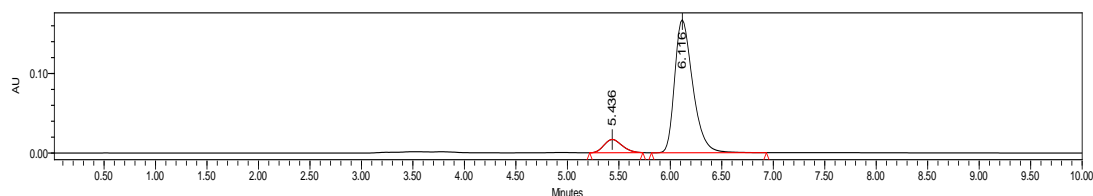

|   | Retention Time | Area    | % Area | Height |
|---|----------------|---------|--------|--------|
| 1 | 5.436          | 203338  | 9.06   | 16689  |
| 2 | 6.116          | 2041746 | 90.94  | 167379 |

**dimethyl 2-((4-(tert-butyl)-5-morpholinooxazol-2-yl)(2-fluorophenyl)methyl)malonate 3de**

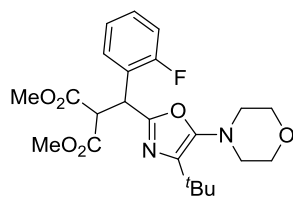

( $C_{23}H_{29}FN_2O_6$ ) colorless oil; 66% yield, 80% *ee*.  $[\alpha]_D^{20} = -47.6$  (*c* 0.59 in  $CH_2Cl_2$ ). HPLC DAICEL CHIRALCEL ID, n-hexane/2-propanol = 70/30, flow rate = 1.0 mL/min,  $\lambda = 254$  nm, retention time: 5.11 min (major), 7.95 min (minor).  $^1H$  NMR (400 MHz,  $CDCl_3$ )  $\delta$  7.24 – 7.14 (m, 2H), 7.08 – 6.89 (m, 2H), 4.99 (d,  $J = 11.6$  Hz, 1H), 4.36 (d,  $J = 11.6$  Hz, 1H), 3.72 – 3.56 (m, 7H), 3.44 (s, 3H), 2.87 – 2.73 (m, 4H), 1.17 (s, 9H).  $^{13}C$  NMR (100 MHz,  $CDCl_3$ )  $\delta$  167.90, 167.33, 160.59 (d,  $J = 247.0$  Hz), 156.53, 149.88, 135.98, 130.13 (d,  $J = 3.5$  Hz), 129.53 (d,  $J = 8.2$  Hz), 124.27 (d,  $J = 3.5$  Hz), 123.83 (d,  $J = 14.1$  Hz), 115.71 (d,  $J = 22.1$  Hz), 66.92, 55.11, 52.66 (d,  $J = 17.2$  Hz), 51.87, 38.49, 38.47, 31.40, 29.58. ESI-HRMS: calcd for  $C_{23}H_{29}FN_2NaO_6^+$  ( $[M+Na^+]$ ) 471.1902, found 471.1906.

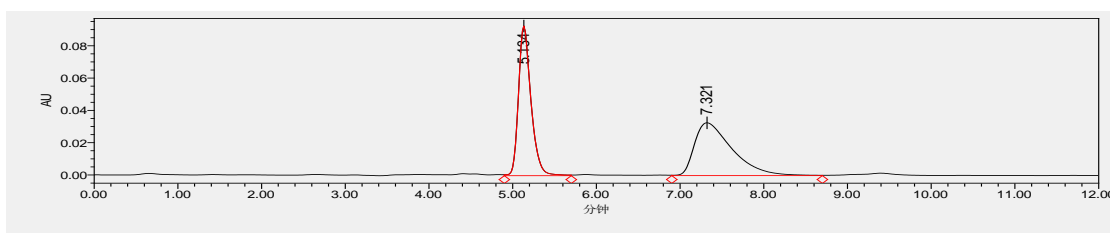

|   | Retention Time | Area    | % Area | Height |
|---|----------------|---------|--------|--------|
| 1 | 5.134          | 958221  | 48.37  | 92577  |
| 2 | 7.321          | 1022875 | 51.63  | 32732  |

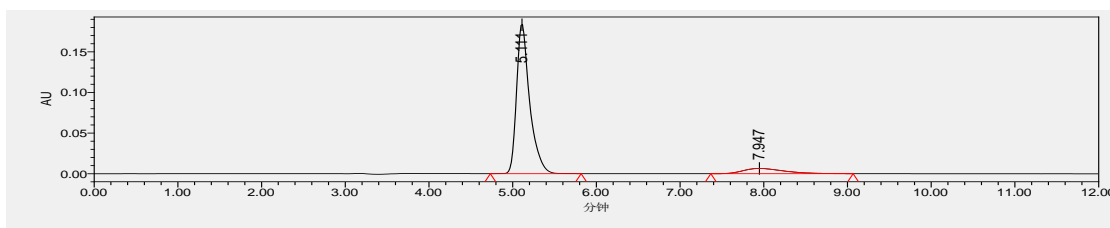

|   | Retention Time | Area    | % Area | Height |
|---|----------------|---------|--------|--------|
| 1 | 5.111          | 2004271 | 90.24  | 183963 |
| 2 | 7.947          | 216875  | 9.76   | 6447   |

### dimethyl 2-((4-tert-butyl-5-morpholinooxazol-2-yl)(3-fluorophenyl)methyl)malonate **3ee**

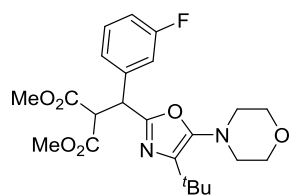

( $C_{23}H_{29}FN_2O_6$ ) white solid; 92% yield, 91% *ee*.  $[\alpha]_D^{20} = -60.6$  (*c* 0.79 in  $CH_2Cl_2$ ). HPLC DAICEL CHIRALCEL ID, n-hexane/2-propanol = 70/30, flow rate = 1.0 mL/min,  $\lambda = 254$  nm, retention time: 5.15 min (major), 9.62 min (minor).  $^1H$  NMR (400 MHz,  $CDCl_3$ )  $\delta$  7.24 – 7.16 (m, 1H), 7.04 – 6.97 (m, 1H), 6.95 – 6.77 (m, 2H), 4.66 (d,  $J = 11.6$  Hz, 1H), 4.27 (d,  $J = 11.6$  Hz, 1H), 3.76 – 3.57 (m, 7H), 3.45 (s, 3H), 2.92 – 2.72 (m, 4H), 1.18 (s, 9H).  $^{13}C$  NMR (100 MHz,  $CDCl_3$ )  $\delta$  167.74, 167.34, 162.72 (d,  $J = 245.0$  Hz), 156.80, 150.01, 139.11 (d,  $J = 7.2$  Hz), 136.04, 130.12 (d,  $J = 8.2$  Hz), 124.3 (d,  $J = 2.9$  Hz), 115.37 (d,  $J = 22.1$  Hz), 114.80 (d,  $J = 20.9$  Hz), 66.92, 56.30, 52.70 (d,  $J = 15.9$  Hz), 51.91, 44.78, 44.76, 31.42, 29.58. ESI-HRMS: calcd for  $C_{23}H_{29}FN_2NaO_6^+$  ( $[M+Na^+]$ ) 471.1902, found 471.1904.



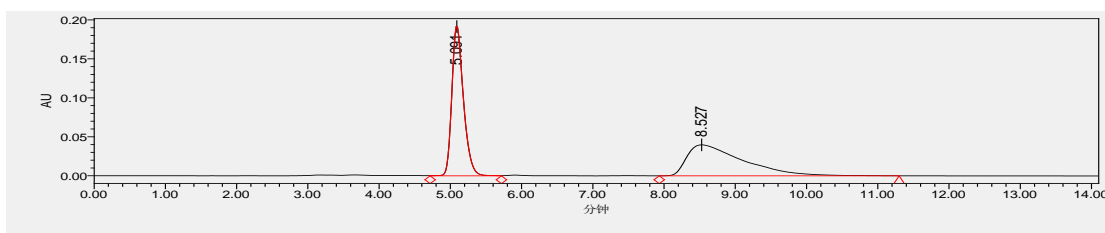

|   | Retention Time | Area    | % Area | Height |
|---|----------------|---------|--------|--------|
| 1 | 5.091          | 2169282 | 50.02  | 192836 |
| 2 | 8.527          | 2167955 | 49.98  | 39759  |

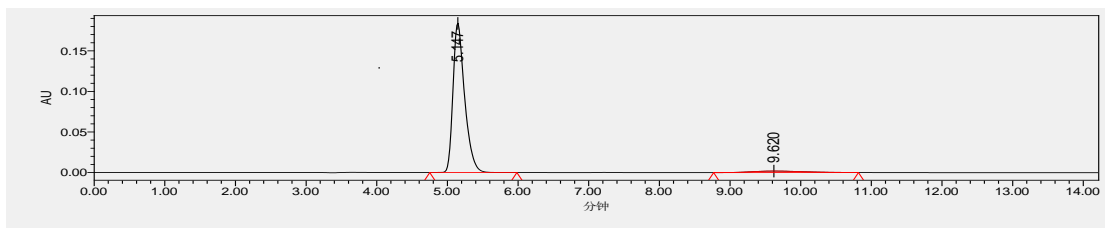

|   | Retention Time | Area    | % Area | Height |
|---|----------------|---------|--------|--------|
| 1 | 5.147          | 2108909 | 95.61  | 184123 |
| 2 | 9.620          | 96910   | 4.39   | 1864   |

**dimethyl 2-((4-tert-butyl-5-morpholinooxazol-2-yl)(3-chlorophenyl)methyl)malonate 3fe**

C23H29ClN2O6 white solid; 77 % yield, 91% *ee*.  $[\alpha]_D^{20} = -57.6$  (*c* 0.88 in  $\text{CH}_2\text{Cl}_2$ ). HPLC DAICEL CHIRALCEL ID, n-hexane/2-propanol = 70/30, flow rate = 1.0 mL/min,  $\lambda = 254$  nm, retention time: 5.30 min (major), 12.68 min (minor).  $^1\text{H}$  NMR (400 MHz,  $\text{CDCl}_3$ )  $\delta$  7.25 – 7.06 (m, 4H), 4.63 (d,  $J = 11.6$  Hz, 1H), 4.26 (d,  $J = 11.6$  Hz, 1H), 3.74 – 3.57 (m, 7H), 3.45 (s, 3H), 2.90 – 2.73 (m, 4H), 1.18 (s, 9H).  $^{13}\text{C}$  NMR (100 MHz,  $\text{CDCl}_3$ )  $\delta$  167.69, 167.29, 156.70, 150.03, 138.68, 136.07, 134.37, 129.87, 128.61, 128.01, 126.68, 66.92, 56.27, 52.77, 52.62, 51.91, 44.74, 31.42, 29.58. ESI-HRMS: calcd for  $\text{C}_{23}\text{H}_{29}^{34.9689}\text{ClN}_2\text{NaO}_6^+$  ( $[\text{M}+\text{Na}^+]$ ) 487.1606, found 487.1614, calcd for  $\text{C}_{23}\text{H}_{29}^{36.9659}\text{ClN}_2\text{NaO}_6^+$  ( $[\text{M}+\text{Na}^+]$ ) 489.1577, found 489.1602.

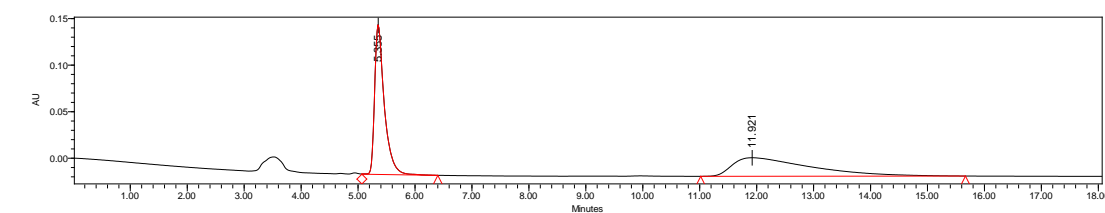

|   | Retention Time | Area    | % Area | Height |
|---|----------------|---------|--------|--------|
| 1 | 5.355          | 1897848 | 50.10  | 161034 |
| 2 | 11.921         | 1890580 | 49.90  | 19888  |

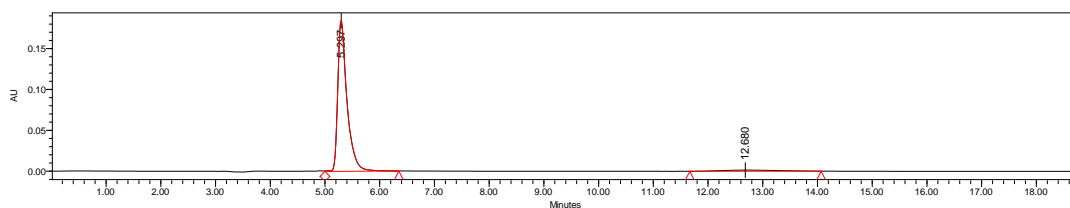

|   | Retention Time | Area    | % Area | Height |
|---|----------------|---------|--------|--------|
| 1 | 5.297          | 2167310 | 95.72  | 184692 |
| 2 | 12.680         | 97008   | 4.28   | 1354   |

**dimethyl 2-((3-bromophenyl)(4-tert-butyl-5-morpholinooxazol-2-yl)methyl)malonate **3ge****

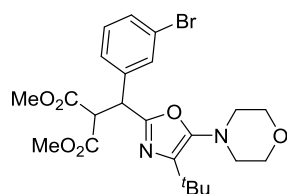

( $C_{23}H_{29}BrN_2O_6$ ) white solid; 96% yield, 91% *ee*.  $[\alpha]_D^{20} = -54.5$  (*c* 0.95 in  $CH_2Cl_2$ ). HPLC DAICEL CHIRALCEL ID, n-hexane/2-propanol = 70/30, flow rate = 1.0 mL/min,  $\lambda = 254$  nm, retention time: 5.43 min (major), 12.94 min (minor).  $^1H$  NMR (400 MHz,  $CDCl_3$ )  $\delta$  7.45 – 7.26 (m, 2H), 7.18 – 7.04 (m, 2H), 4.62 (d,  $J = 11.6$  Hz, 1H), 4.26 (d,  $J = 11.6$  Hz, 1H), 3.71 – 3.58 (m, 7H), 3.46 (s, 3H), 2.92 – 2.75 (m, 4H), 1.18 (s, 9H).  $^{13}C$  NMR (100 MHz,  $CDCl_3$ )  $\delta$  167.68, 167.28, 156.68, 150.04, 138.93, 136.07, 131.54, 130.94, 130.17, 127.13, 122.52, 66.92, 56.29, 52.79, 52.65, 51.91, 44.69, 31.42, 29.58. ESI-HRMS: calcd for  $C_{23}H_{29}^{78,9183}BrN_2NaO_6^+$  ( $[M+Na^+]$ ) 530.1101, found 530.1103, calcd for  $C_{23}H_{29}^{80,9163}BrN_2NaO_6^+$  ( $[M+Na^+]$ ) 533.1081, found 533.1090.

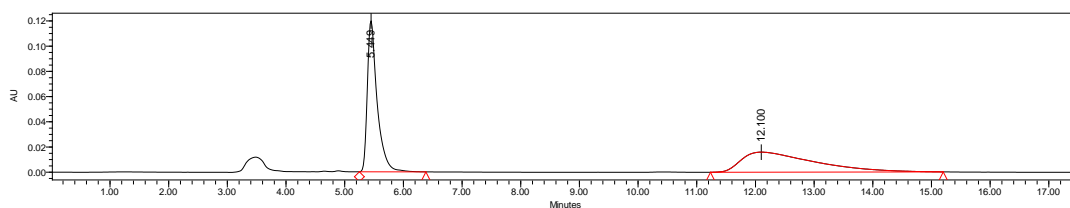

|   | Retention Time | Area    | % Area | Height |
|---|----------------|---------|--------|--------|
| 1 | 5.449          | 1403348 | 50.55  | 119761 |
| 2 | 12.100         | 1372871 | 49.45  | 15943  |

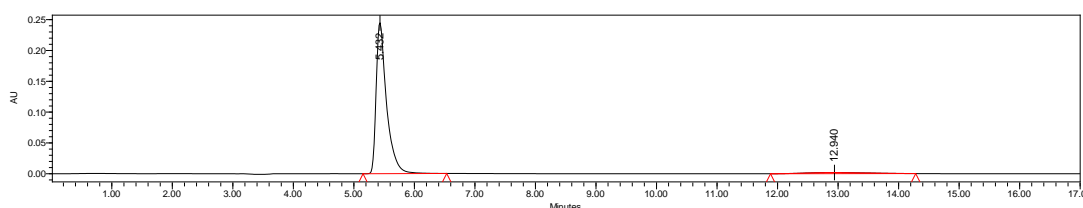

|   | Retention Time | Area    | % Area | Height |
|---|----------------|---------|--------|--------|
| 1 | 5.432          | 2923839 | 95.53  | 244747 |
| 2 | 12.940         | 136949  | 4.47   | 1962   |

**dimethyl 2-((4-tert-butyl-5-morpholinooxazol-2-yl)(m-tolyl)methyl)malonate **3he****

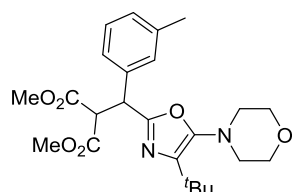

( $C_{24}H_{32}N_2O_6$ ) white solid; 66% yield, 94% *ee*.  $[\alpha]_D^{20} = -68.1$  (*c* 0.54 in  $CH_2Cl_2$ ). HPLC DAICEL CHIRALCEL ID, n-hexane/2-propanol = 70/30, flow rate = 1.0 mL/min,  $\lambda = 254$  nm,

retention time: 5.12 min (major), 9.37 min (minor).  $^1\text{H}$  NMR (400 MHz,  $\text{CDCl}_3$ )  $\delta$  7.22 – 7.00 (m, 4H), 4.68 (d,  $J = 11.8$  Hz, 1H), 4.35 (d,  $J = 11.8$  Hz, 1H), 3.79 – 3.63 (m, 7H), 3.49 (s, 3H), 2.96 – 2.79 (m, 4H), 2.32 (s, 3H), 1.25 (s, 9H).  $^{13}\text{C}$  NMR (100 MHz,  $\text{CDCl}_3$ )  $\delta$  168.02, 167.56, 157.43, 149.78, 138.19, 136.58, 135.87, 129.18, 128.46, 125.33, 66.96, 56.55, 52.67, 52.48, 51.94, 45.13, 31.40, 29.61, 21.42. ESI-HRMS: calcd for  $\text{C}_{24}\text{H}_{32}\text{N}_2\text{NaO}_6^+$  ( $[\text{M}+\text{Na}^+]$ ) 467.2153, found 467.2153.

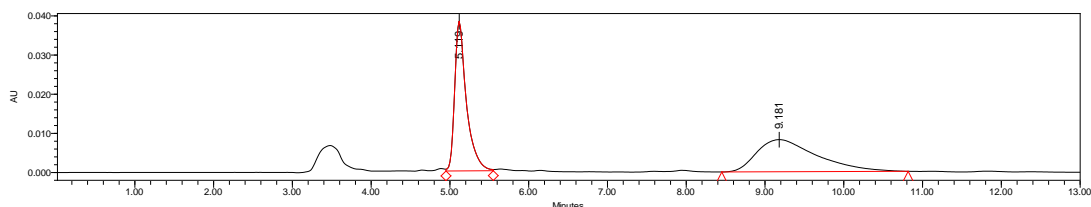

|   | Retention Time | Area   | % Area | Height |
|---|----------------|--------|--------|--------|
| 1 | 5.119          | 394419 | 47.56  | 38184  |
| 2 | 9.181          | 434855 | 52.44  | 8212   |

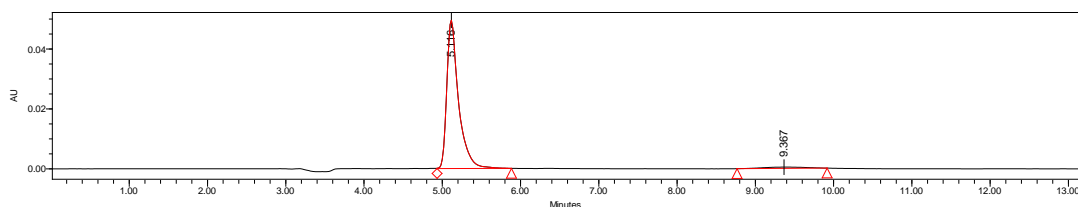

|   | Retention Time | Area   | % Area | Height |
|---|----------------|--------|--------|--------|
| 1 | 5.116          | 514905 | 96.97  | 49460  |
| 2 | 9.367          | 16091  | 3.03   | 426    |

### dimethyl 2-((4-tert-butyl-5-morpholinooxazol-2-yl)(3-methoxyphenyl)methyl)malonate **3ie**

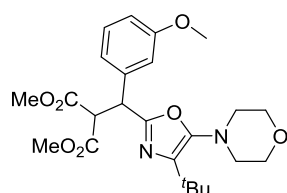

( $\text{C}_{24}\text{H}_{32}\text{N}_2\text{O}_7$ ) colorless oil; 81% yield, 90% *ee*.  $[\alpha]_{\text{D}}^{20} = -61.7$  (*c* 0.61 in  $\text{CH}_2\text{Cl}_2$ ). HPLC DAICEL CHIRALCEL ID, n-hexane/2-propanol = 70/30, flow rate = 1.0 mL/min,  $\lambda = 254$  nm, retention time: 6.47 min (major), 14.68 min (minor).  $^1\text{H}$  NMR (400 MHz,  $\text{CDCl}_3$ )  $\delta$  7.13 (t,  $J = 7.8$  Hz, 1H), 6.74 (dt,  $J = 8.0, 4.8$  Hz, 3H), 4.63 (d,  $J = 11.8$  Hz, 1H), 4.29 (d,  $J = 11.8$  Hz, 1H), 3.70 (s, 3H), 3.67 – 3.52 (m, 7H), 3.44 (s, 3H), 2.87 – 2.74 (m, 4H), 1.18 (s, 9H).  $^{13}\text{C}$  NMR (100 MHz,  $\text{CDCl}_3$ )  $\delta$  167.96, 167.50, 159.62, 157.28, 149.82, 138.13, 135.89, 129.57, 120.73, 113.86, 113.33, 66.95, 56.50, 55.15, 52.71, 52.57, 51.94, 45.11, 31.41, 29.60. ESI-HRMS: calcd for  $\text{C}_{24}\text{H}_{32}\text{N}_2\text{NaO}_7^+$  ( $[\text{M}+\text{Na}^+]$ ) 483.2102, found 483.2104.

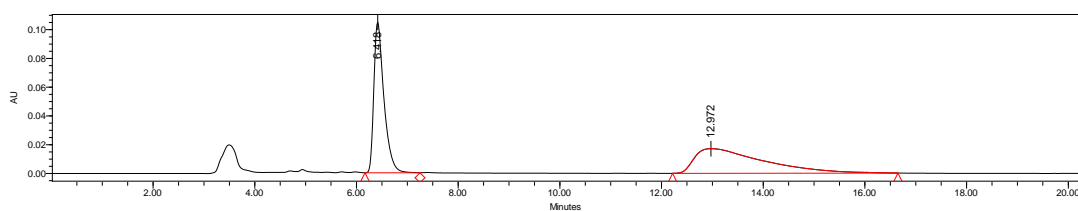

|   | Retention Time | Area | % Area | Height |
|---|----------------|------|--------|--------|
| 1 | 6.47           |      |        |        |
| 2 | 12.972         |      |        |        |

|   |        |         |       |        |
|---|--------|---------|-------|--------|
| 1 | 6.418  | 1445120 | 47.41 | 104766 |
| 2 | 12.972 | 1603287 | 52.59 | 17129  |

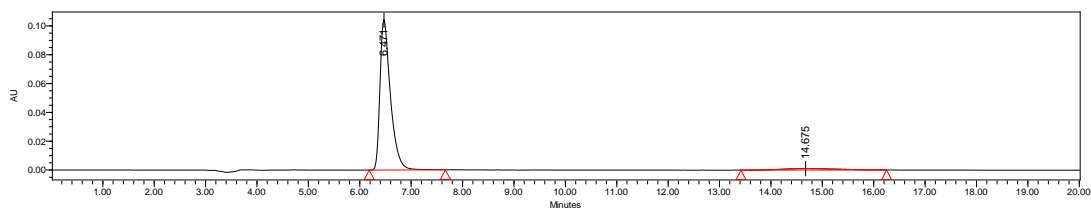

|   | Retention Time | Area    | % Area | Height |
|---|----------------|---------|--------|--------|
| 1 | 6.471          | 1476464 | 95.10  | 104441 |
| 2 | 14.675         | 76019   | 4.90   | 1019   |

**dimethyl 2-((4-tert-butyl-5-morpholinooxazol-2-yl)(3-phenoxyphenyl)methyl)malonate 3je**

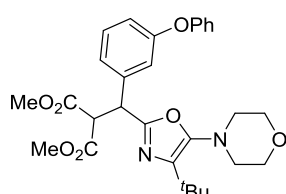

( $C_{29}H_{34}N_2O_7$ ) colorless oil; 84% yield, 88% *ee*.  $[\alpha]_D^{20} = -52.9$  (*c* 1.21 in  $CH_2Cl_2$ ). HPLC DAICEL CHIRALCEL ID, n-hexane/2-propanol = 80/20, flow rate = 1.0 mL/min,  $\lambda = 254$  nm, retention time: 5.52 min (major), 6.56 min (minor).  $^1H$  NMR (400 MHz,  $CDCl_3$ )  $\delta$  7.28 – 7.15 (m, 3H), 7.06 – 6.71 (m, 6H), 4.63 (d, *J* = 11.6 Hz, 1H), 4.24 (d, *J* = 11.6 Hz, 1H), 3.74 – 3.55 (m, 7H), 3.46 (s, 3H), 2.89 – 2.68 (m, 4H), 1.15 (s, 9H).  $^{13}C$  NMR (100 MHz,  $CDCl_3$ )  $\delta$  167.85, 167.39, 157.39, 157.01, 156.95, 149.90, 138.61, 135.96, 129.94, 129.76, 123.42, 123.33, 118.90, 118.66, 118.28, 66.94, 56.39, 52.74, 52.60, 51.91, 44.97, 31.39, 29.59. ESI-HRMS: calcd for  $C_{29}H_{34}N_2NaO_7^+$  ( $[M+Na^+]$ ) 545.2258, found 545.2266.

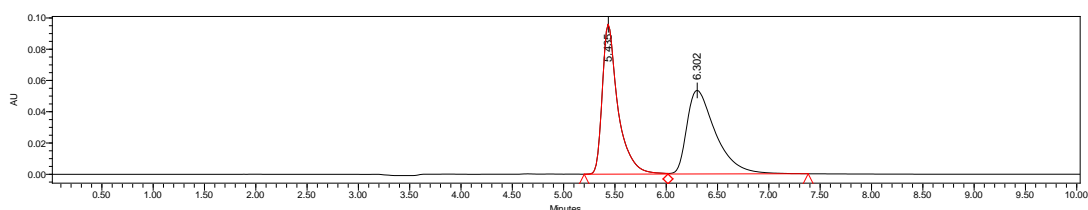

|   | Retention Time | Area    | % Area | Height |
|---|----------------|---------|--------|--------|
| 1 | 5.435          | 1012736 | 49.36  | 95834  |
| 2 | 6.302          | 1038796 | 50.64  | 53501  |

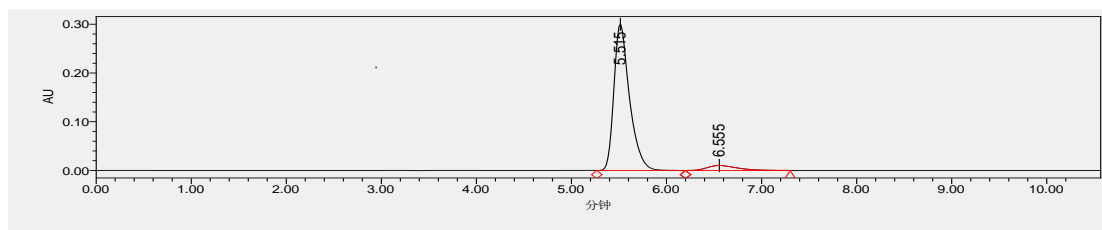

|   | Retention Time | Area    | % Area | Height |
|---|----------------|---------|--------|--------|
| 1 | 5.515          | 3423774 | 93.98  | 300577 |
| 2 | 6.555          | 219357  | 6.02   | 10136  |

**dimethyl 2-((4-tert-butyl-5-morpholinooxazol-2-yl)(4-fluorophenyl)methyl)malonate 3ke**

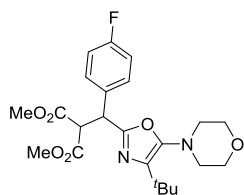

( $C_{23}H_{29}FN_2O_6$ ) white solid; 86% yield, 93% *ee*.  $[\alpha]_D^{20} = -61.0$  (*c* 1.61 in  $CH_2Cl_2$ ). HPLC DAICEL CHIRALCEL ID, n-hexane/2-propanol = 80/20, flow rate = 1.0 mL/min,  $\lambda = 254$  nm, retention time: 5.62 min (major), 8.38 min (minor).  $^1H$  NMR (400 MHz,  $CDCl_3$ )  $\delta$  7.23 – 7.14 (m, 2H), 6.91 (t,  $J = 8.6$  Hz, 2H), 4.64 (d,  $J = 11.8$  Hz, 1H), 4.26 (d,  $J = 11.8$  Hz, 1H), 3.64 (dd,  $J = 6.7, 4.0$  Hz, 7H), 3.43 (s, 3H), 2.91 – 2.72 (m, 4H), 1.18 (s, 9H).  $^{13}C$  NMR (100 MHz,  $CDCl_3$ )  $\delta$  167.83, 167.47, 162.25 (d,  $J = 245.0$  Hz), 157.18, 149.92, 135.98, 132.45 (d,  $J = 3.2$  Hz), 130.08 (d,  $J = 8.1$  Hz), 115.56 (d,  $J = 21.4$  Hz), 66.92, 56.49, 52.75, 52.59, 51.91, 44.39, 31.41, 29.58. ESI-HRMS: calcd for  $C_{23}H_{29}FN_2NaO_6^+$  ( $[M+Na^+]$ ) 471.1902, found 471.1907.

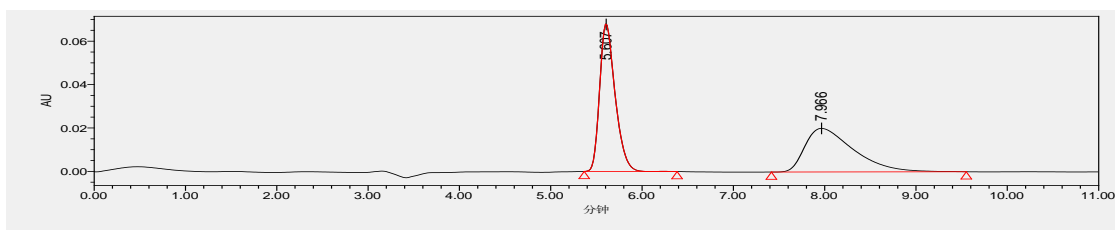

|   | Retention Time | Area   | % Area | Height |
|---|----------------|--------|--------|--------|
| 1 | 5.607          | 800484 | 51.88  | 68206  |
| 2 | 7.966          | 742378 | 48.12  | 20102  |

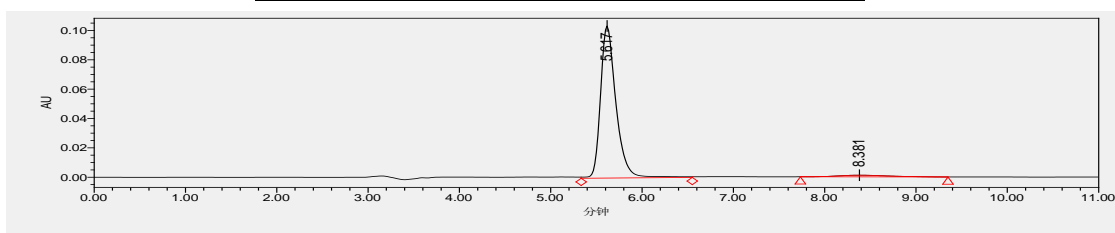

|   | Retention Time | Area    | % Area | Height |
|---|----------------|---------|--------|--------|
| 1 | 5.617          | 1220150 | 96.45  | 103577 |
| 2 | 8.381          | 44878   | 3.55   | 1138   |

### dimethyl 2-((4-tert-butyl-5-morpholinooxazol-2-yl)(4-chlorophenyl)methyl)malonate **3e**

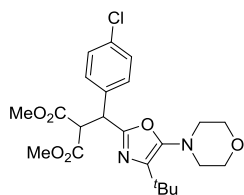

( $C_{23}H_{29}ClN_2O_6$ ) white solid; 96% yield, 94% *ee*.  $[\alpha]_D^{20} = -52.3$  (*c* 1.63 in  $CH_2Cl_2$ ). HPLC DAICEL CHIRALCEL ID, n-hexane/2-propanol = 80/20, flow rate = 1.0 mL/min,  $\lambda = 254$  nm, retention time: 5.77 min (major), 11.68 min (minor).  $^1H$  NMR (400 MHz,  $CDCl_3$ )  $\delta$  7.23 – 7.11 (m, 4H), 4.64 (d,  $J = 11.6$  Hz, 1H), 4.26 (d,  $J = 11.6$  Hz, 1H), 3.74 – 3.55 (m, 7H), 3.45 (s, 3H), 2.89 – 2.70 (m, 4H), 1.18 (s, 9H).  $^{13}C$  NMR (100 MHz,  $CDCl_3$ )  $\delta$  167.75, 167.37, 156.93, 149.98, 136.03, 135.21, 133.69, 129.81, 128.84, 66.92, 56.28, 52.79, 52.65, 51.91, 44.49, 31.41, 29.58. ESI-HRMS: calcd for  $C_{23}H_{29}^{34.9689}ClN_2NaO_6^+$  ( $[M+Na^+]$ ) 487.1606, found 487.1612, calcd for  $C_{23}H_{29}^{36.9659}ClN_2NaO_6^+$  ( $[M+Na^+]$ ) 489.1577, found 489.1602.

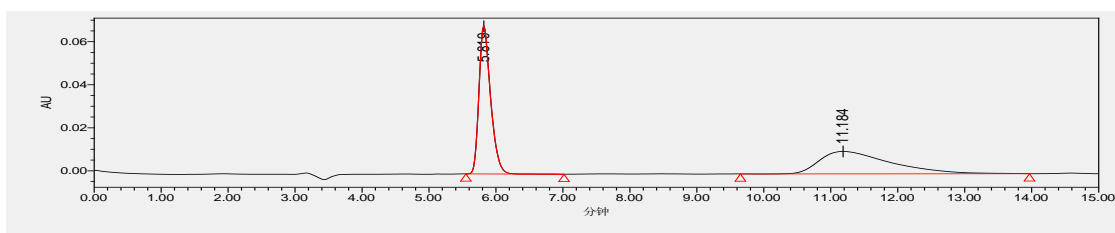

|   | Retention Time | Area   | % Area | Height |
|---|----------------|--------|--------|--------|
| 1 | 5.819          | 828915 | 51.85  | 68793  |
| 2 | 11.184         | 769891 | 48.15  | 10411  |

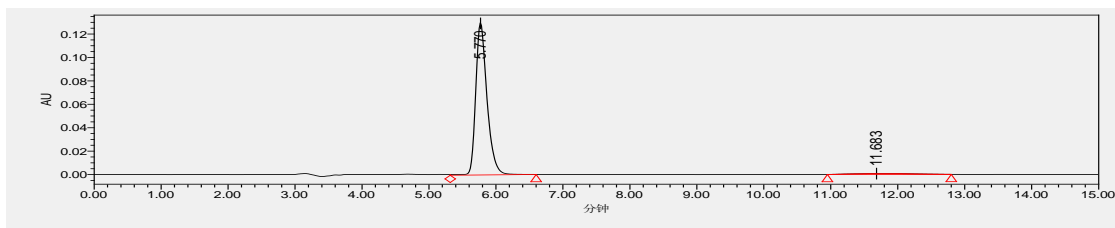

|   | Retention Time | Area    | % Area | Height |
|---|----------------|---------|--------|--------|
| 1 | 5.770          | 1524866 | 96.94  | 130021 |
| 2 | 11.683         | 48179   | 3.06   | 717    |

**dimethyl 2-((4-bromophenyl)(4-tert-butyl-5-morpholinooxazol-2-yl)methyl)malonate 3me**

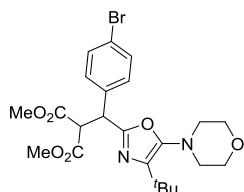

( $C_{23}H_{29}BrN_2O_6$ ) white solid; 93% yield, 94% *ee*.  $[\alpha]_D^{20} = -46.9$  (*c* 1.76 in  $CH_2Cl_2$ ). HPLC DAICEL CHIRALCEL ID, *n*-hexane/2-propanol = 80/20, flow rate = 1.0 mL/min,  $\lambda = 254$  nm, retention time: 5.97 min (major), 14.11 min (minor).  $^1H$  NMR (400 MHz,  $CDCl_3$ )  $\delta$  7.43 (d,  $J = 8.4$  Hz, 2H), 7.17 (d,  $J = 8.4$  Hz, 2H), 4.70 (d,  $J = 11.6$  Hz, 1H), 4.33 (d,  $J = 11.6$  Hz, 1H), 3.78 – 3.56 (m, 7H), 3.52 (s, 3H), 2.94 – 2.80 (m, 4H), 1.25 (s, 9H).  $^{13}C$  NMR (100 MHz,  $CDCl_3$ )  $\delta$  167.74, 167.35, 156.86, 149.99, 136.02, 135.73, 131.80, 130.16, 121.88, 66.92, 56.21, 52.81, 52.68, 51.91, 44.54, 31.41, 29.58. ESI-HRMS: calcd for  $C_{23}H_{29}^{78.9183}BrN_2NaO_6^+$  ( $[M+Na^+]$ ) 530.1101, found 530.1102, calcd for  $C_{23}H_{29}^{80.9163}BrN_2NaO_6^+$  ( $[M+Na^+]$ ) 533.1081, found 533.1086.

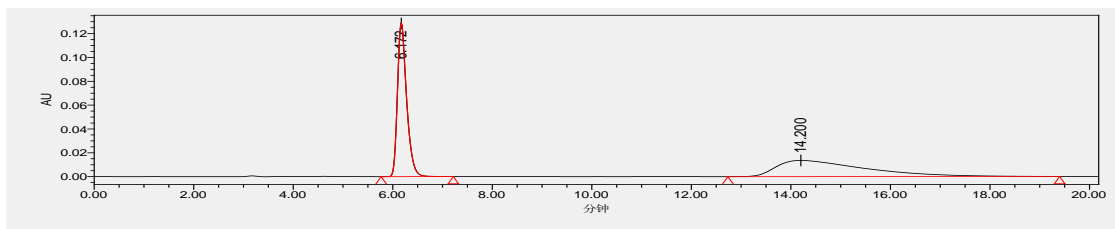

|   | Retention Time | Area    | % Area | Height |
|---|----------------|---------|--------|--------|
| 1 | 6.172          | 1652794 | 49.61  | 129120 |
| 2 | 14.200         | 1678780 | 50.39  | 13579  |

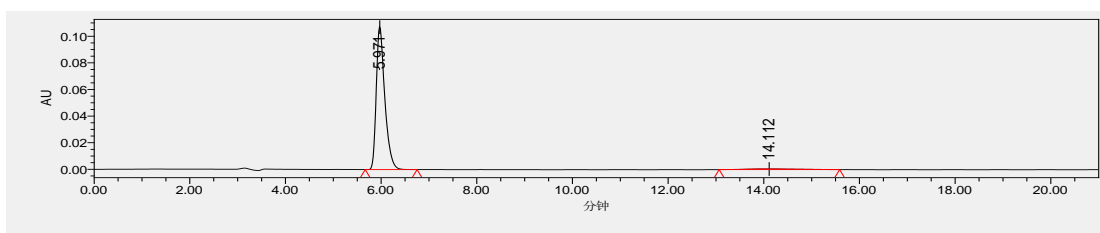

|   | Retention Time | Area    | % Area | Height |
|---|----------------|---------|--------|--------|
| 1 | 5.971          | 1329639 | 97.16  | 107527 |
| 2 | 14.112         | 38805   | 2.84   | 511    |

### dimethyl

### 2-((4-tert-butyl-5-morpholinooxazol-2-yl)(4-(trifluoromethyl)phenyl)methyl)malonate

#### 3ne

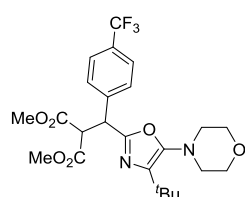

( $C_{24}H_{29}F_3N_2O_6$ ) white solid; 86% yield, 92% *ee*.  $[\alpha]_D^{20} = -53.2$  (*c* 1.80 in  $CH_2Cl_2$ ). HPLC DAICEL CHIRALCEL ID, n-hexane/2-propanol = 80/20, flow rate = 1.0 mL/min,  $\lambda = 254$  nm, retention time: 4.76 min (major), 7.40 min (minor).  $^1H$  NMR (400 MHz,  $CDCl_3$ )  $\delta$  7.49 (d, *J* = 8.2 Hz, 2H), 7.35 (d, *J* = 8.1 Hz, 2H), 4.73 (d, *J* = 11.7 Hz, 1H), 4.31 (d, *J* = 11.7 Hz, 1H), 3.75 – 3.55 (m, 7H), 3.44 (s, 3H), 2.91 – 2.69 (m, 4H), 1.18 (s, 9H).  $^{13}C$  NMR (100 MHz,  $CDCl_3$ )  $\delta$  167.63, 167.24, 156.57, 150.11, 140.72, 136.15, 130.01 (q, *J* = 32.3 Hz), 128.90, 125.50 (d, *J* = 3.8 Hz), 122.62, 66.90, 56.15, 52.85, 52.67, 51.90, 44.82, 31.43, 29.56. ESI-HRMS: calcd for  $C_{24}H_{29}F_3N_2NaO_6^+$  ( $[M+Na^+]$ ) 521.1870, found 521.1870.

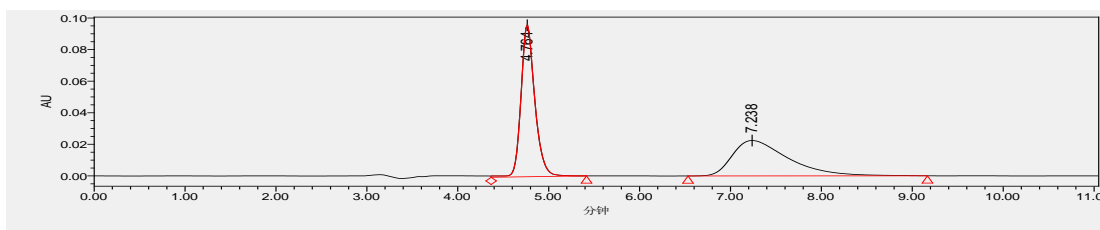

|   | Retention Time | Area    | % Area | Height |
|---|----------------|---------|--------|--------|
| 1 | 4.764          | 1016723 | 51.44  | 96165  |
| 2 | 7.238          | 959801  | 48.56  | 22438  |

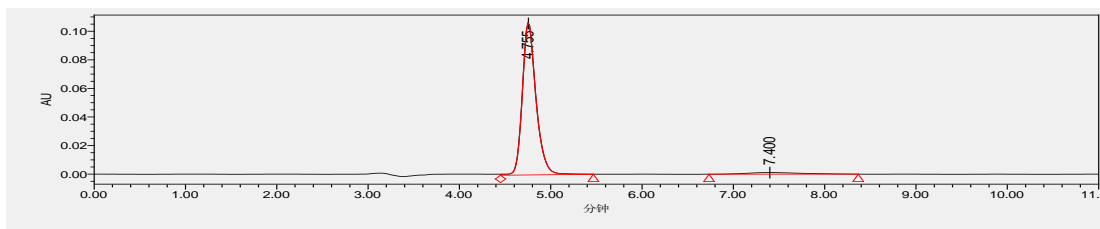

|   | Retention Time | Area    | % Area | Height |
|---|----------------|---------|--------|--------|
| 1 | 4.755          | 1110748 | 95.89  | 106712 |
| 2 | 7.400          | 47573   | 4.11   | 1108   |

### dimethyl 2-((4-tert-butyl-5-morpholinooxazol-2-yl)(4-cyanophenyl)methyl)malonate 3oe

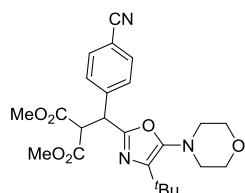

( $C_{24}H_{29}N_3O_6$ ) white solid; 98% yield, 94% *ee*.  $[\alpha]_D^{20} = -48.2$  (*c* 1.72 in  $CH_2Cl_2$ ). HPLC DAICEL CHIRALCEL ID, n-hexane/2-propanol =

80/20, flow rate = 1.0 mL/min,  $\lambda$  = 254 nm, retention time: 9.58 min (major), 12.73 min (minor).  $^1\text{H}$  NMR (400 MHz,  $\text{CDCl}_3$ )  $\delta$  7.54 (d,  $J$  = 8.2 Hz, 2H), 7.35 (d,  $J$  = 8.2 Hz, 2H), 4.72 (d,  $J$  = 11.7 Hz, 1H), 4.29 (d,  $J$  = 11.7 Hz, 1H), 3.64 (s, 7H), 3.45 (s, 3H), 2.92 – 2.68 (m, 4H), 1.18 (s, 9H).  $^{13}\text{C}$  NMR (100 MHz,  $\text{CDCl}_3$ )  $\delta$  167.44, 167.12, 156.15, 150.24, 142.04, 136.28, 132.45, 129.35, 118.45, 111.87, 66.87, 55.94, 52.91, 52.75, 51.88, 44.96, 31.44, 29.55. ESI-HRMS: calcd for  $\text{C}_{24}\text{H}_{29}\text{N}_3\text{NaO}_6^+$  ( $[\text{M}+\text{Na}^+]$ ) 478.1949, found 478.1956.

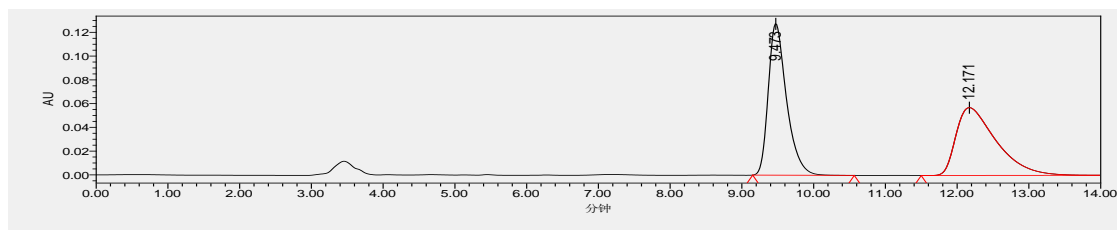

|   | Retention Time | Area    | % Area | Height |
|---|----------------|---------|--------|--------|
| 1 | 9.473          | 2258384 | 50.40  | 127728 |
| 2 | 12.171         | 2222357 | 49.60  | 57142  |

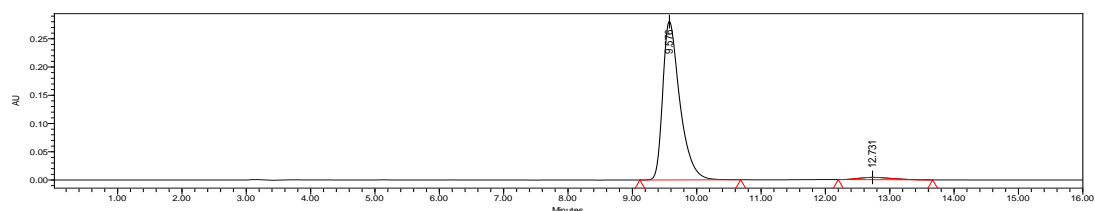

|   | Retention Time | Area    | % Area | Height |
|---|----------------|---------|--------|--------|
| 1 | 9.576          | 5169436 | 97.23  | 281156 |
| 2 | 12.731         | 147491  | 2.77   | 4093   |

### dimethyl 2-((4-tert-butyl-5-morpholinooxazol-2-yl)(4-nitrophenyl)methyl)malonate **3pe**

C23H29N3O8 white solid; 91% yield, 94% *ee*.  $[\alpha]_{\text{D}}^{20} = -51.5$  ( $c$  0.85 in  $\text{CH}_2\text{Cl}_2$ ). HPLC DAICEL CHIRALCEL ID, *n*-hexane/2-propanol = 70/30, flow rate = 1.0 mL/min,  $\lambda$  = 254 nm, retention time: 7.26 min (major), 12.42 min (minor).  $^1\text{H}$  NMR (400 MHz,  $\text{CDCl}_3$ )  $\delta$  8.10 (d,  $J$  = 8.7 Hz, 2H), 7.42 (d,  $J$  = 8.7 Hz, 2H), 4.79 (d,  $J$  = 11.6 Hz, 1H), 4.32 (d,  $J$  = 11.6 Hz, 1H), 3.74 – 3.57 (m, 7H), 3.46 (s, 3H), 2.92 – 2.67 (m, 4H), 1.18 (s, 9H).  $^{13}\text{C}$  NMR (100 MHz,  $\text{CDCl}_3$ )  $\delta$  167.41, 167.08, 156.04, 150.30, 147.53, 144.00, 136.35, 129.53, 123.87, 66.87, 55.94, 52.97, 52.82, 51.88, 44.71, 31.45, 29.55. ESI-HRMS: calcd for  $\text{C}_{23}\text{H}_{29}\text{N}_3\text{NaO}_8^+$  ( $[\text{M}+\text{Na}^+]$ ) 498.1847, found 498.1858.

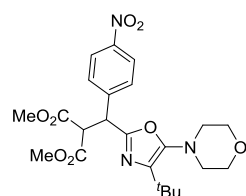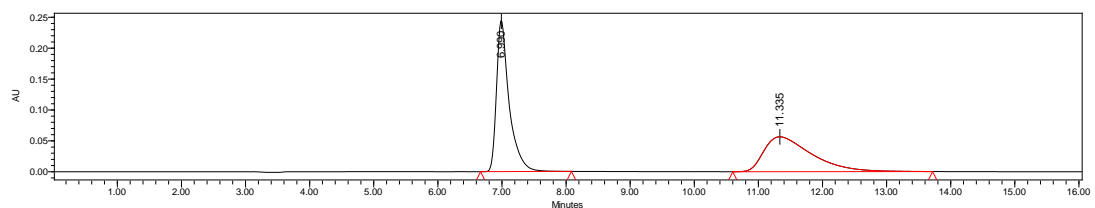

|   | Retention Time | Area    | % Area | Height |
|---|----------------|---------|--------|--------|
| 1 | 6.990          | 3354989 | 53.51  | 244785 |
| 2 | 11.335         | 2915005 | 46.49  | 56427  |



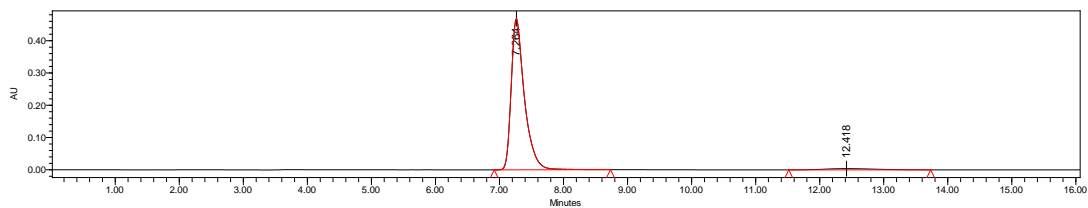

|   | Retention Time | Area    | % Area | Height |
|---|----------------|---------|--------|--------|
| 1 | 7.264          | 6697373 | 96.99  | 468745 |
| 2 | 12.418         | 207792  | 3.01   | 3867   |

### dimethyl 2-((4-tert-butyl-5-morpholinooxazol-2-yl)(p-tolyl)methyl)malonate 3qe

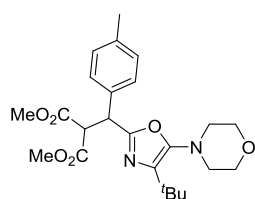

( $C_{24}H_{32}N_2O_6$ ) colorless oil; 83% yield, 94% *ee*.  $[\alpha]_D^{20} = -63.2$  (*c* 1.29 in  $CH_2Cl_2$ ). HPLC DAICEL CHIRALCEL ID, n-hexane/2-propanol = 80/20, flow rate = 1.0 mL/min,  $\lambda = 254$  nm, retention time: 6.84 min (major), 17.80 min (minor).  $^1H$  NMR (400 MHz,  $CDCl_3$ )  $\delta$  7.13 (dd,  $J = 28.0, 8.0$  Hz, 4H), 4.69 (d,  $J = 11.8$  Hz, 1H), 4.34 (d,  $J = 11.8$  Hz, 1H), 3.80 – 3.63 (m, 7H), 3.50 (s, 3H), 2.96 – 2.80 (m, 4H), 2.30 (s, 3H), 1.25 (s, 9H).  $^{13}C$  NMR (100 MHz,  $CDCl_3$ )  $\delta$  168.04, 167.57, 157.53, 149.76, 137.35, 135.83, 133.63, 129.32, 128.23, 66.95, 56.58, 52.68, 52.52, 51.93, 44.82, 31.39, 29.61, 21.10. ESI-HRMS: calcd for  $C_{24}H_{32}N_2NaO_6^+$  ( $[M+Na^+]$ ) 467.2153, found 467.2154.

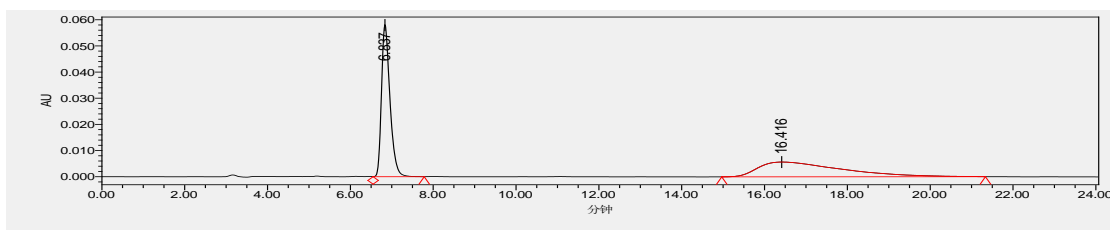

|   | Retention Time | Area   | % Area | Height |
|---|----------------|--------|--------|--------|
| 1 | 6.837          | 825376 | 51.23  | 58131  |
| 2 | 16.416         | 785616 | 48.77  | 5647   |

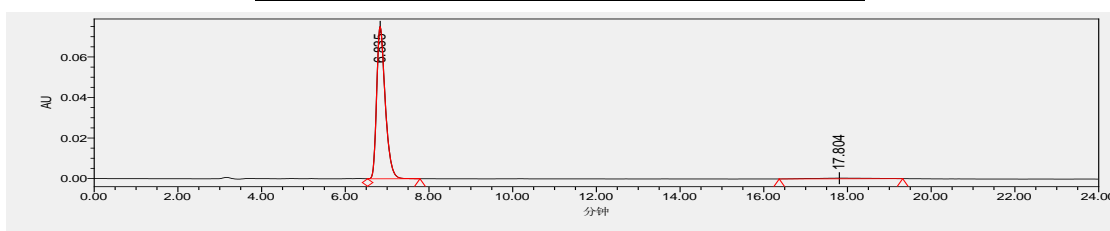

|   | Retention Time | Area    | % Area | Height |
|---|----------------|---------|--------|--------|
| 1 | 6.835          | 1065583 | 97.15  | 75046  |
| 2 | 17.804         | 31293   | 2.85   | 323    |

### dimethyl 2-(biphenyl-4-yl(4-tert-butyl-5-morpholinooxazol-2-yl)methyl)malonate 3re

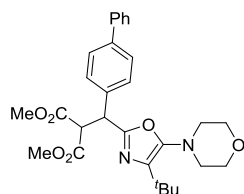

( $C_{29}H_{34}N_2O_6$ ) white solid; 98% yield, 91% *ee*.  $[\alpha]_D^{20} = -42.9$  (*c* 3.14 in  $CH_2Cl_2$ ). HPLC DAICEL CHIRALCEL ID, n-hexane/2-propanol = 90/10, flow rate = 1.0 mL/min,  $\lambda = 254$  nm, retention time: 10.82 min (major), 13.34 min (minor).  $^1H$  NMR (400 MHz,  $CDCl_3$ )  $\delta$  7.55 (dd,  $J$

= 12.0, 7.9 Hz, 4H), 7.37 (qd,  $J = 15.1, 7.4$  Hz, 5H), 4.79 (d,  $J = 11.8$  Hz, 1H), 4.41 (d,  $J = 11.8$  Hz, 1H), 3.71 (d,  $J = 5.9$  Hz, 7H), 3.51 (s, 3H), 3.01 – 2.77 (m, 4H), 1.32 – 1.22 (m, 9H).  $^{13}\text{C}$  NMR (100 MHz,  $\text{CDCl}_3$ )  $\delta$  167.97, 167.57, 157.32, 149.91, 140.49, 140.45, 135.96, 135.70, 128.85, 128.80, 127.42, 127.29, 126.99, 66.96, 56.50, 52.76, 52.61, 51.96, 44.87, 31.44, 29.65. ESI-HRMS: calcd for  $\text{C}_{29}\text{H}_{35}\text{N}_2\text{O}_6^+$  ( $[\text{M}+\text{H}^+]$ ) 507.2490, found 507.2488.

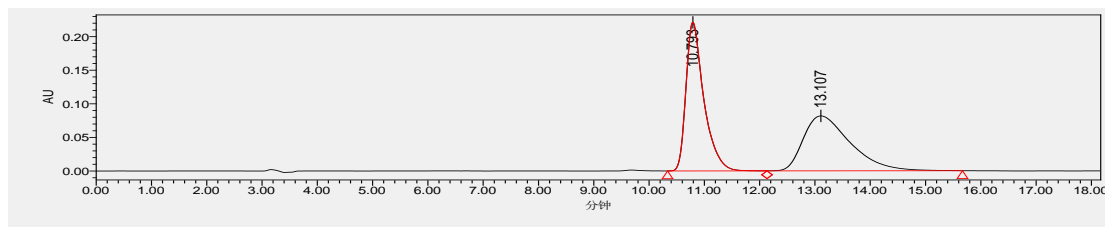

|   | Retention Time | Area    | % Area | Height |
|---|----------------|---------|--------|--------|
| 1 | 10.793         | 4953554 | 50.70  | 221225 |
| 2 | 13.107         | 4816702 | 49.30  | 81698  |

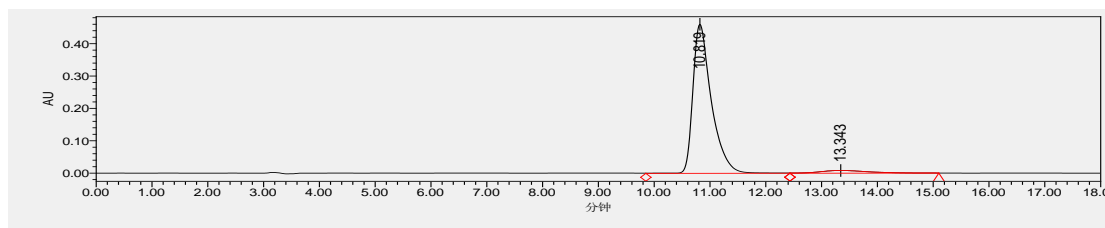

|   | Retention Time | Area     | % Area | Height |
|---|----------------|----------|--------|--------|
| 1 | 10.819         | 10583335 | 95.50  | 460729 |
| 2 | 13.343         | 498390   | 4.50   | 8402   |

**dimethyl 2-((4-tert-butyl-5-morpholinooxazol-2-yl)(4-methoxyphenyl)methyl)malonate 3se**

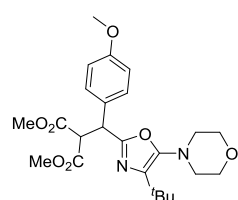

( $\text{C}_{24}\text{H}_{32}\text{N}_2\text{O}_7$ ) colorless oil; 87% yield, 96% *ee*.  $[\alpha]_{\text{D}}^{20} = -64.7$  (*c* 0.73 in  $\text{CH}_2\text{Cl}_2$ ). HPLC DAICEL CHIRALCEL ID, *n*-hexane/2-propanol = 80/20, flow rate = 1.0 mL/min,  $\lambda = 254$  nm, retention time: 8.03 min (major), 18.26 min (minor).  $^1\text{H}$  NMR (400 MHz,  $\text{CDCl}_3$ )  $\delta$  7.23 – 7.11 (m, 2H), 6.89 – 6.65 (m, 2H), 4.68 (d,  $J = 11.6$  Hz, 1H), 4.32 (d,  $J = 11.6$  Hz, 1H), 3.77 (s, 3H), 3.76 – 3.62 (m, 7H), 3.51 (s, 3H), 3.03 – 2.70 (m, 4H), 1.25 (s, 9H).  $^{13}\text{C}$  NMR (100 MHz,  $\text{CDCl}_3$ )  $\delta$  168.03, 167.63, 159.02, 157.62, 149.75, 135.84, 129.48, 128.70, 113.97, 66.96, 56.66, 55.17, 52.67, 52.54, 51.93, 44.43, 31.39, 29.61. ESI-HRMS: calcd for  $\text{C}_{24}\text{H}_{32}\text{N}_2\text{NaO}_7^+$  ( $[\text{M}+\text{Na}^+]$ ) 483.2102, found 483.2106.

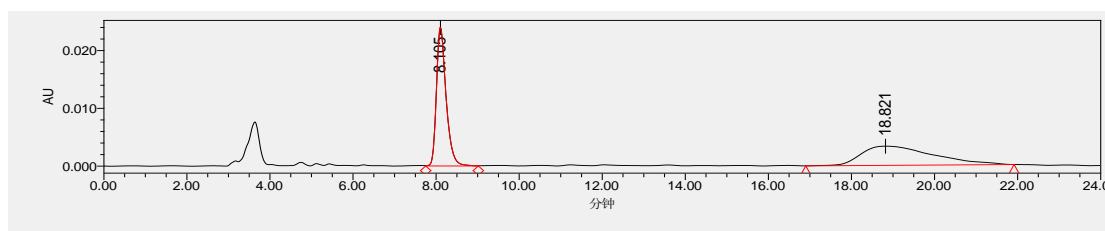

|   | Retention Time | Area   | % Area | Height |
|---|----------------|--------|--------|--------|
| 1 | 8.105          | 386632 | 49.10  | 24013  |
| 2 | 18.821         | 400801 | 50.90  | 3322   |

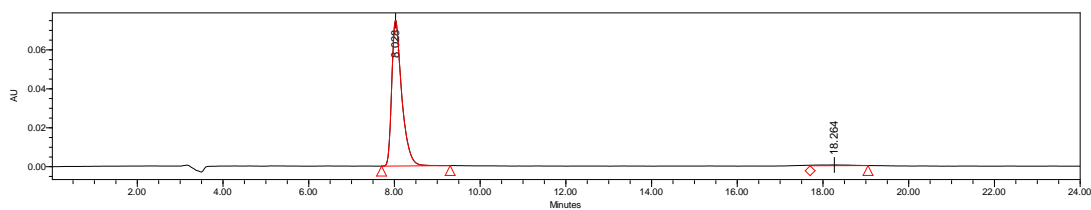

|   | Retention Time | Area    | % Area | Height |
|---|----------------|---------|--------|--------|
| 1 | 8.028          | 1210793 | 98.14  | 74854  |
| 2 | 18.264         | 22939   | 1.86   | 410    |

**dimethyl 2-((4-tert-butyl-5-morpholinooxazol-2-yl)(4-phenoxyphenyl)methyl)malonate 3te**

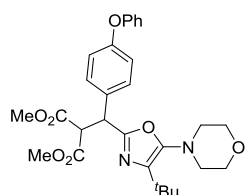

( $C_{29}H_{34}N_2O_7$ ) colorless oil; 64% yield, 92% *ee*.  $[\alpha]_D^{20} = -50.3$  (*c* 0.66 in  $CH_2Cl_2$ ). HPLC DAICEL CHIRALCEL ID, n-hexane/2-propanol = 80/20, flow rate = 1.0 mL/min,  $\lambda = 254$  nm, retention time: 6.77 min (major), 9.90 min (minor).  $^1H$  NMR (400 MHz,  $CDCl_3$ )  $\delta$  7.37 – 7.28 (m, 2H), 7.23 (d, *J* = 8.6 Hz, 2H), 7.17 – 7.06 (m, 1H), 7.04 – 6.87 (m, 4H), 4.72 (d, *J* = 11.6 Hz, 1H), 4.34 (d, *J* = 11.6 Hz, 1H), 3.79 – 3.64 (m, 7H), 3.53 (s, 3H), 2.98 – 2.79 (m, 4H), 1.25 (s, 9H).  $^{13}C$  NMR (100 MHz,  $CDCl_3$ )  $\delta$  167.93, 167.57, 157.37, 156.97, 156.73, 149.86, 135.93, 131.24, 129.78, 129.77, 123.57, 119.21, 118.56, 66.96, 56.64, 52.72, 52.58, 51.94, 44.50, 31.42, 29.61. ESI-HRMS: calcd for  $C_{29}H_{35}N_2O_7^+$  ( $[M+H]^+$ ) 523.2439, found 523.2440.

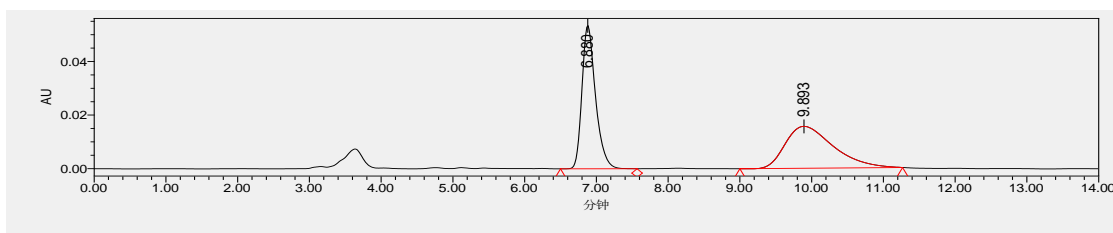

|   | Retention Time | Area   | % Area | Height |
|---|----------------|--------|--------|--------|
| 1 | 6.880          | 703109 | 49.14  | 53438  |
| 2 | 9.893          | 727679 | 50.86  | 15630  |

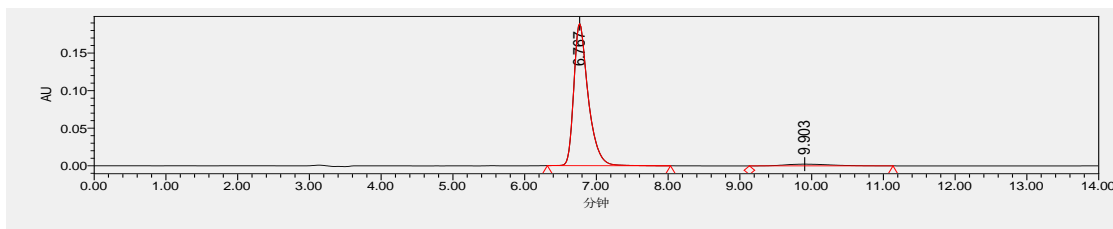

|   | Retention Time | Area    | % Area | Height |
|---|----------------|---------|--------|--------|
| 1 | 6.767          | 2624169 | 96.21  | 188894 |
| 2 | 9.903          | 103425  | 3.79   | 2344   |

**dimethyl**

**2-((4-(benzyloxy)phenyl)(4-tert-butyl-5-morpholinooxazol-2-yl)methyl)malonate 3ue**

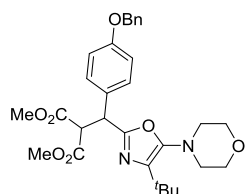

( $C_{30}H_{36}N_2O_7$ ) colorless oil; 64% yield, 92% *ee*.  $[\alpha]_D^{20} = -49.7$  (*c* 0.66

in CH<sub>2</sub>Cl<sub>2</sub>). HPLC DAICEL CHIRALCEL ID, n-hexane/2-propanol = 80/20, flow rate = 1.0 mL/min, λ = 254 nm, retention time: 9.38 min (major), 10.91 min (minor). <sup>1</sup>H NMR (400 MHz, CDCl<sub>3</sub>) δ 7.53 – 7.28 (m, 5H), 7.24 – 7.11 (m, 2H), 6.99 – 6.78 (m, 2H), 5.02 (s, 2H), 4.68 (d, *J* = 11.6 Hz, 1H), 4.32 (d, *J* = 11.6 Hz, 1H), 3.82 – 3.59 (m, 7H), 3.49 (s, 3H), 2.99 – 2.73 (m, 4H), 1.25 (s, 9H). <sup>13</sup>C NMR (100 MHz, CDCl<sub>3</sub>) δ 168.02, 167.64, 158.28, 157.59, 149.77, 136.87, 135.86, 129.53, 128.99, 128.59, 128.02, 127.53, 114.91, 69.98, 66.97, 56.67, 52.67, 52.53, 51.94, 44.46, 31.41, 29.62. ESI-HRMS: calcd for C<sub>30</sub>H<sub>36</sub>N<sub>2</sub>NaO<sub>7</sub><sup>+</sup> ([M+Na<sup>+</sup>]) 559.2415, found 559.2421.

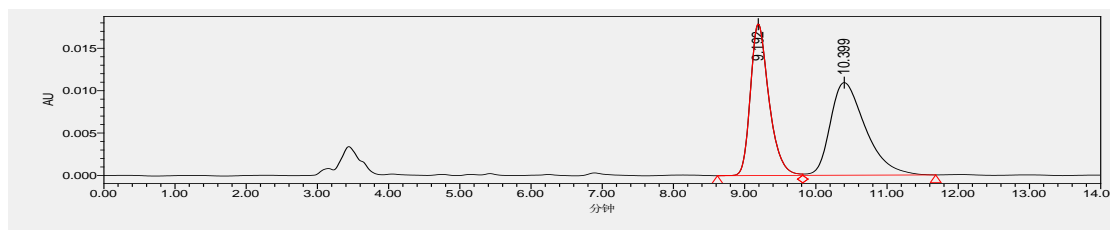

|   | Retention Time | Area   | % Area | Height |
|---|----------------|--------|--------|--------|
| 1 | 9.192          | 323290 | 46.31  | 17913  |
| 2 | 10.399         | 374805 | 53.69  | 10934  |

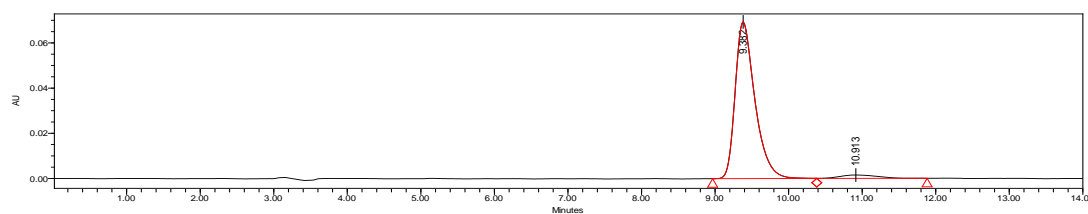

|   | Retention Time | Area    | % Area | Height |
|---|----------------|---------|--------|--------|
| 1 | 9.382          | 1292128 | 96.05  | 69373  |
| 2 | 10.913         | 53139   | 3.95   | 1503   |

### dimethyl

#### 2-((4-(tert-butyl)-5-morpholinooxazol-2-yl)(3,4-dichlorophenyl)methyl)malonate 3ve

CC(C)(C)C1=CN(C2=CC(=CC(=C2)Cl)Cl)OC3=CC=C(C3C(=O)OC)C4=CC=CC=C4 (C<sub>23</sub>H<sub>28</sub>Cl<sub>2</sub>N<sub>2</sub>O<sub>6</sub>) colorless oil; 90% yield, 92% *ee*. [α]<sub>D</sub><sup>20</sup> = -42.1 (c 0.86 in CH<sub>2</sub>Cl<sub>2</sub>). HPLC DAICEL CHIRALCEL ID, n-hexane/2-propanol = 70/30, flow rate = 1.0 mL/min, λ = 254 nm, retention time: 5.03 min (major), 24.56 min (minor). <sup>1</sup>H NMR (400 MHz, CDCl<sub>3</sub>) δ 7.32 (dd, *J* = 10.5, 5.2 Hz, 2H), 7.07 (dd, *J* = 8.3, 2.1 Hz, 1H), 4.62 (d, *J* = 11.7 Hz, 1H), 4.24 (d, *J* = 11.7 Hz, 1H), 3.71 – 3.58 (m, 7H), 3.49 (s, 3H), 2.87 – 2.75 (m, 4H), 1.18 (s, 9H). <sup>13</sup>C NMR (100 MHz, CDCl<sub>3</sub>) δ 166.50, 166.15, 155.38, 149.12, 135.91, 135.18, 131.65, 131.03, 129.59, 129.49, 126.85, 65.90, 55.11, 51.82, 51.75, 50.90, 43.16, 30.42, 28.55. ESI-HRMS: calcd for C<sub>23</sub>H<sub>28</sub><sup>34,9689</sup>Cl<sub>2</sub>N<sub>2</sub>NaO<sub>6</sub><sup>+</sup> ([M+Na<sup>+</sup>]) 521.1217, found 521.1229, calcd for C<sub>23</sub>H<sub>28</sub><sup>34,9689</sup>Cl<sup>36,9659</sup>CIN<sub>2</sub>NaO<sub>6</sub><sup>+</sup> ([M+Na<sup>+</sup>]) 523.1187, found 523.1215.

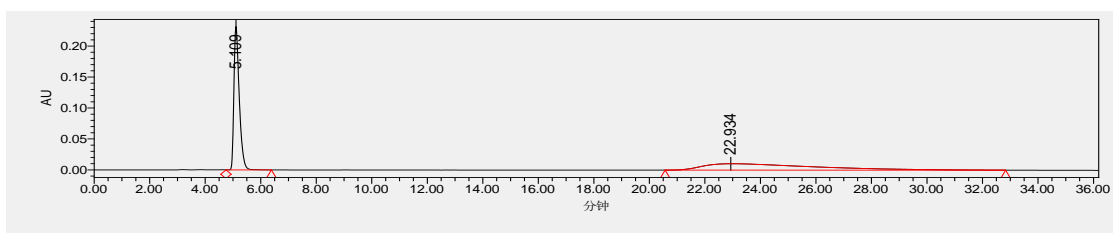

|   | Retention Time | Area    | % Area | Height |
|---|----------------|---------|--------|--------|
| 1 | 5.109          | 3105170 | 51.98  | 232898 |
| 2 | 22.934         | 2868680 | 48.02  | 10306  |

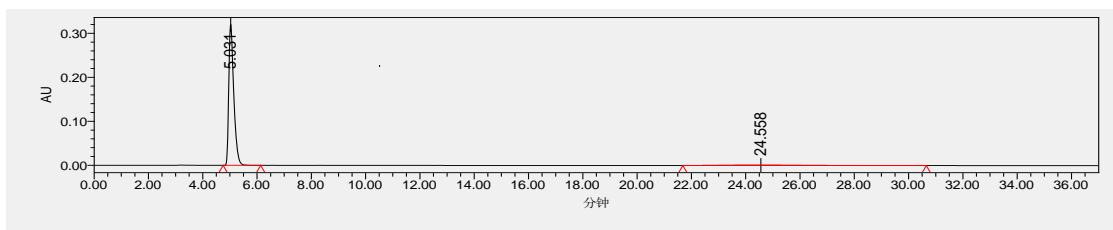

|   | Retention Time | Area    | % Area | Height |
|---|----------------|---------|--------|--------|
| 1 | 5.031          | 4088713 | 95.97  | 319822 |
| 2 | 24.558         | 171791  | 4.03   | 767    |

**dimethyl 2-((4-tert-butyl-5-morpholinooxazol-2-yl)(naphthalen-2-yl)methyl)malonate**  
**3we**

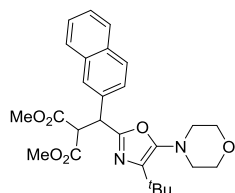

( $C_{27}H_{32}N_2O_6$ ) colorless oil; 81% yield, 90% *ee*.  $[\alpha]_D^{20} = -51.1$  (*c* 0.74 in  $CH_2Cl_2$ ). HPLC DAICEL CHIRALCEL ID, n-hexane/2-propanol = 70/30, flow rate = 1.0 mL/min,  $\lambda = 254$  nm, retention time: 6.20 min (major), 22.16 min (minor).  $^1H$  NMR (400 MHz,  $CDCl_3$ )  $\delta$  7.79 (dd,  $J = 13.2, 8.4$  Hz, 4H), 7.51 – 7.36 (m, 3H), 4.91 (d,  $J = 11.8$  Hz, 1H), 4.50 (d,  $J = 11.8$  Hz, 1H), 3.77 – 3.62 (m, 7H), 3.42 (s, 3H), 2.86 (t,  $J = 4.6$  Hz, 4H), 1.27 (s, 9H).  $^{13}C$  NMR (100 MHz,  $CDCl_3$ )  $\delta$  168.01, 167.54, 157.38, 149.91, 135.98, 134.12, 133.30, 132.79, 128.40, 128.00, 127.73, 127.64, 126.22, 126.15, 125.91, 66.94, 56.38, 52.76, 52.57, 51.93, 45.31, 31.44, 29.63. ESI-HRMS: calcd for  $C_{27}H_{32}N_2NaO_6^+$  ( $[M+Na^+]$ ) 503.2153, found 503.2159.

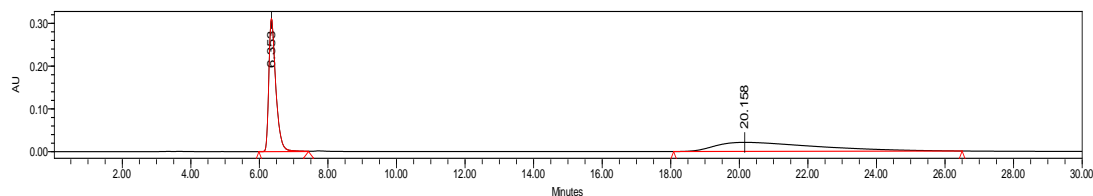

|   | Retention Time | Area    | % Area | Height |
|---|----------------|---------|--------|--------|
| 1 | 6.353          | 4396656 | 50.12  | 311744 |
| 2 | 20.158         | 4375672 | 49.88  | 21136  |

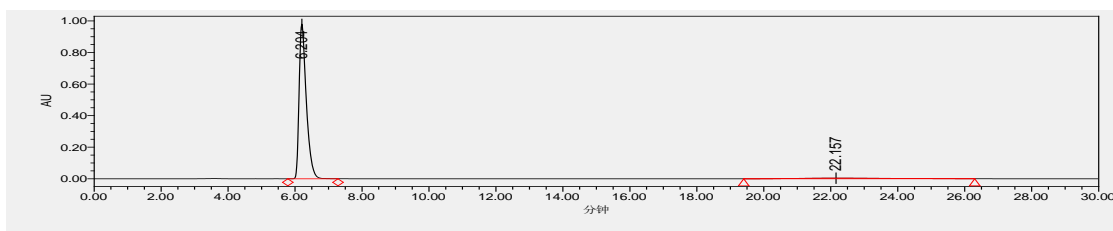

|   | Retention Time | Area     | % Area | Height |
|---|----------------|----------|--------|--------|
| 1 | 6.204          | 14637108 | 95.07  | 981153 |
| 2 | 22.157         | 758692   | 4.93   | 3912   |

**dimethyl 2-((4-(tert-butyl)-5-morpholinooxazol-2-yl)(thiophen-2-yl)methyl)malonate 3xe**

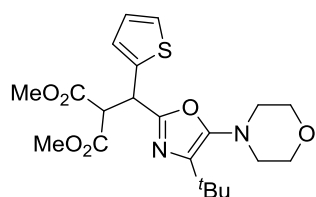

( $C_{21}H_{28}N_2O_6S$ ) white solid; 28% yield, 85% *ee*.  $[\alpha]_D^{20} = -46.3$  (*c* 0.24 in  $CH_2Cl_2$ ). HPLC DAICEL CHIRALCEL ID, n-hexane/2-propanol = 90/10, flow rate = 1.0 mL/min,  $\lambda = 254$  nm, retention time: 9.27 min (major), 11.40 min (minor).  $^1H$  NMR (400 MHz,  $CDCl_3$ )  $\delta$  7.17 – 7.08 (m, 1H), 6.91 – 6.79 (m, 2H), 5.00 (d,  $J = 11.5$  Hz, 1H), 4.27 (d,  $J = 11.5$  Hz, 1H), 3.70 – 3.63 (m, 4H), 3.61 (s, 3H), 3.54 (s, 3H), 2.89 – 2.80 (m, 4H), 1.18 (s, 9H).  $^{13}C$  NMR (100 MHz,  $CDCl_3$ )  $\delta$  166.43, 166.29, 155.59, 148.92, 138.09, 135.10, 125.73, 125.61, 124.53, 65.92, 56.21, 51.73, 50.93, 39.43, 30.41, 28.57. ESI-HRMS: calcd for  $C_{21}H_{28}N_2NaO_6S^+$  ( $[M+Na^+]$ ) 459.1560, found 459.1567.

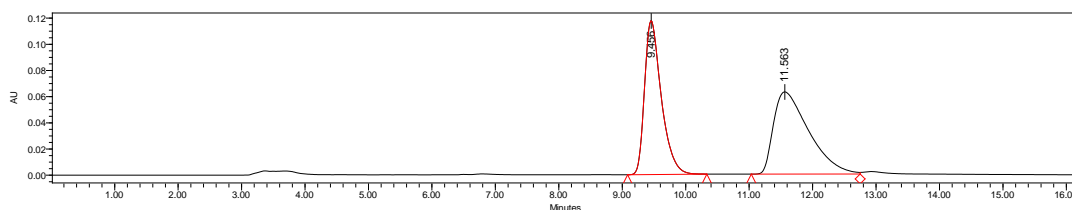

|   | Retention Time | Area    | % Area | Height |
|---|----------------|---------|--------|--------|
| 1 | 9.456          | 2154165 | 46.98  | 117632 |
| 2 | 11.563         | 2430721 | 53.02  | 62797  |

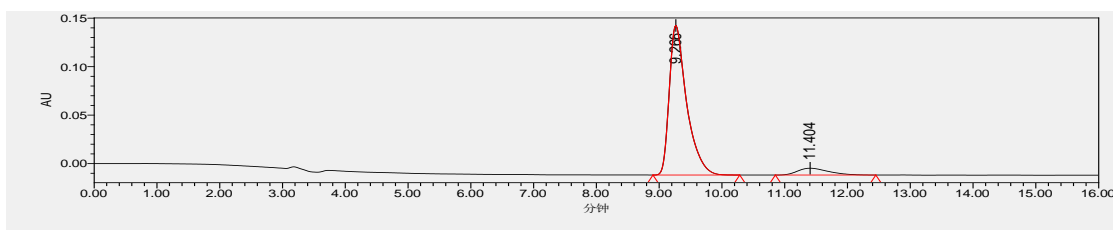

|   | Retention Time | Area    | % Area | Height |
|---|----------------|---------|--------|--------|
| 1 | 9.266          | 2961315 | 92.51  | 154244 |
| 2 | 11.404         | 239916  | 7.49   | 7026   |

**dimethyl 2-((4-(tert-butyl)-5-morpholinooxazol-2-yl)(furan-3-yl)methyl)malonate 3ye**

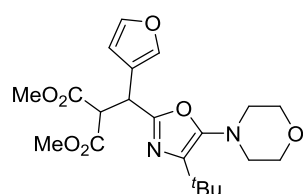

( $C_{21}H_{28}N_2O_7$ ) yellow oil; 76% yield, 89% *ee*.  $[\alpha]_D^{20} = -32.6$  (*c* 0.82 in  $CH_2Cl_2$ ). HPLC DAICEL CHIRALCEL IE, n-hexane/2-propanol = 80/20, flow rate = 1.0 mL/min,  $\lambda = 254$  nm, retention time: 6.10 min (minor), 6.97 min (major).  $^1H$  NMR (400

MHz, CDCl<sub>3</sub>) δ 7.33 (dd, *J* = 6.0, 4.4 Hz, 2H), 6.33 (d, *J* = 0.9 Hz, 1H), 4.73 (d, *J* = 11.2 Hz, 1H), 4.21 (d, *J* = 11.2 Hz, 1H), 3.79 – 3.71 (m, 4H), 3.66 (d, *J* = 12.9 Hz, 6H), 2.99 – 2.82 (m, 4H), 1.25 (s, 9H). <sup>13</sup>C NMR (100 MHz, CDCl<sub>3</sub>) δ 167.66, 167.62, 156.88, 149.76, 143.05, 140.55, 136.02, 121.07, 110.05, 66.96, 56.02, 52.72, 52.68, 51.95, 36.26, 31.40, 29.60. ESI-HRMS: calcd for C<sub>21</sub>H<sub>28</sub>N<sub>2</sub>NaO<sub>7</sub><sup>+</sup> ([M+Na<sup>+</sup>]) 443.1789, found 443.1792.

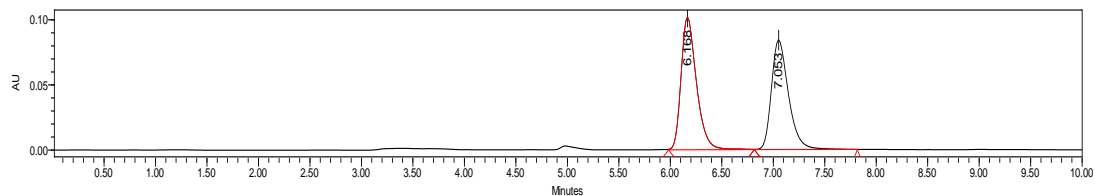

|   | Retention Time | Area    | % Area | Height |
|---|----------------|---------|--------|--------|
| 1 | 6.168          | 1055615 | 52.19  | 101998 |
| 2 | 7.053          | 967161  | 47.81  | 84285  |

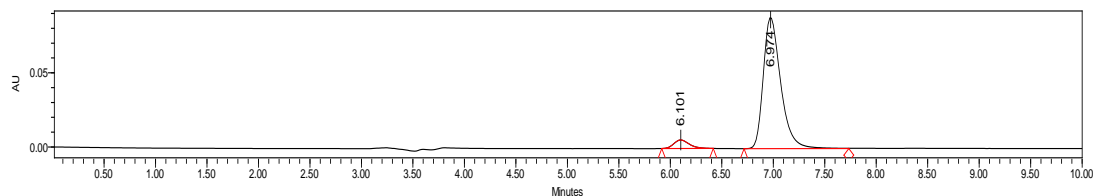

|   | Retention Time | Area    | % Area | Height |
|---|----------------|---------|--------|--------|
| 1 | 6.101          | 59860   | 5.44   | 5771   |
| 2 | 6.974          | 1040520 | 94.56  | 88732  |

### dimethyl 2-((4-(tert-butyl)-5-morpholinooxazol-2-yl)(cyclohexyl)methyl)malonate **3ze**

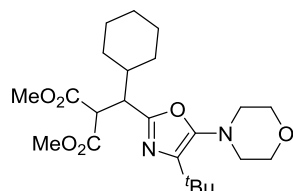

(C<sub>23</sub>H<sub>36</sub>N<sub>2</sub>O<sub>6</sub>) colorless oil; 81% yield, 86% *ee*. [ $\alpha$ ]<sub>D</sub><sup>20</sup> = -13.8 (*c* 0.81 in CH<sub>2</sub>Cl<sub>2</sub>). HPLC DAICEL CHIRALCEL ID, n-hexane/2-propanol = 90/10, flow rate = 1.0 mL/min,  $\lambda$  = 254 nm, retention time: 5.78 min (major), 8.30 min (minor). <sup>1</sup>H NMR (400 MHz, CDCl<sub>3</sub>) δ 4.09 (d, *J* = 11.3 Hz, 1H), 3.83 – 3.71 (m, 7H), 3.60 (s, 3H), 3.49 (dd, *J* = 11.3, 4.1 Hz, 1H), 3.01 – 2.89 (m, 4H), 1.95 – 1.44 (m, 7H), 1.24 (s, 9H), 1.17 – 0.91 (m, 3H), 0.80 – 0.58 (m, 1H). <sup>13</sup>C NMR (100 MHz, CDCl<sub>3</sub>) δ 168.64, 168.43, 157.68, 149.18, 135.54, 66.98, 52.73, 52.49, 52.01, 44.72, 39.65, 31.88, 31.31, 29.61, 28.26, 26.61, 26.32, 26.23. ESI-HRMS: calcd for C<sub>23</sub>H<sub>36</sub>N<sub>2</sub>NaO<sub>6</sub><sup>+</sup> ([M+Na<sup>+</sup>]) 459.2466, found 459.2466.

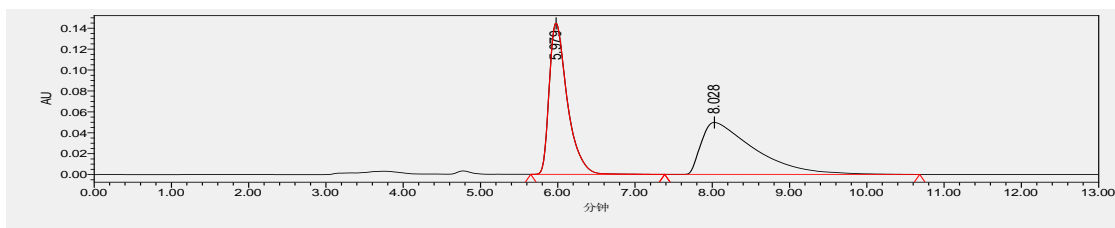

|   | Retention Time | Area    | % Area | Height |
|---|----------------|---------|--------|--------|
| 1 | 5.979          | 2347979 | 49.78  | 144672 |
| 2 | 8.028          | 2368492 | 50.22  | 49684  |

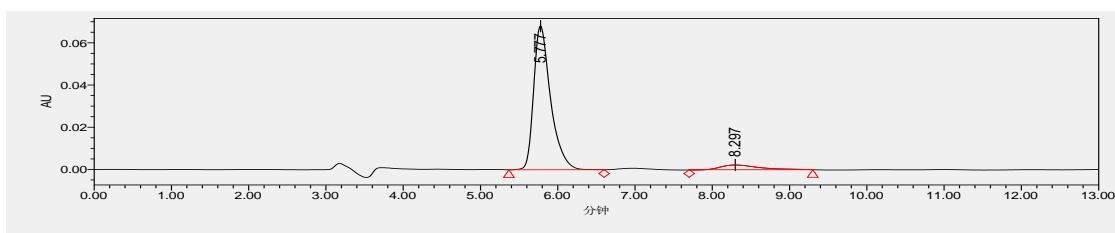

|   | Retention Time | Area    | % Area | Height |
|---|----------------|---------|--------|--------|
| 1 | 5.777          | 1038477 | 93.14  | 68203  |
| 2 | 8.297          | 76541   | 6.86   | 2231   |

### dimethyl 2-(1-(4-(tert-butyl)-5-morpholinooxazol-2-yl)ethyl)malonate **4ae**

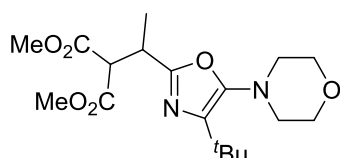

( $C_{18}H_{28}N_2O_6$ ) colorless oil; 83% yield, 72% *ee*.  $[\alpha]_D^{20} = -6.0$  (*c* 1.30 in  $CH_2Cl_2$ ). HPLC DAICEL CHIRALCEL ID, n-hexane/2-propanol = 90/10, flow rate = 1.0 mL/min,  $\lambda = 254$  nm, retention time: 6.65 min (major), 7.67 min (minor).

$^1H$  NMR (400 MHz,  $CDCl_3$ )  $\delta$  3.77 (d, *J* = 9.6 Hz, 1H), 3.73 – 3.65 (m, 7H), 3.61 (s, 3H), 3.59 – 3.50 (m, 1H), 2.93 – 2.82 (m, 4H), 1.27 (d, *J* = 7.0 Hz, 3H), 1.18 (s, 9H).  $^{13}C$  NMR (100 MHz,  $CDCl_3$ )  $\delta$  168.28, 168.25, 159.11, 149.42, 135.83, 66.99, 55.46, 52.58, 52.57, 52.53, 51.95, 34.09, 31.33, 29.61, 16.19. ESI-HRMS: calcd for  $C_{18}H_{28}N_2NaO_6^+$  ( $[M+Na]^+$ ) 391.1840, found 391.1841.

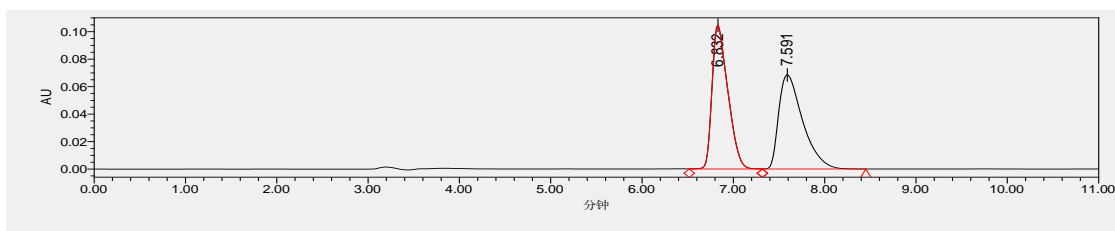

|   | Retention Time | Area    | % Area | Height |
|---|----------------|---------|--------|--------|
| 1 | 6.832          | 1252643 | 50.10  | 104686 |
| 2 | 7.591          | 1247539 | 49.90  | 68615  |

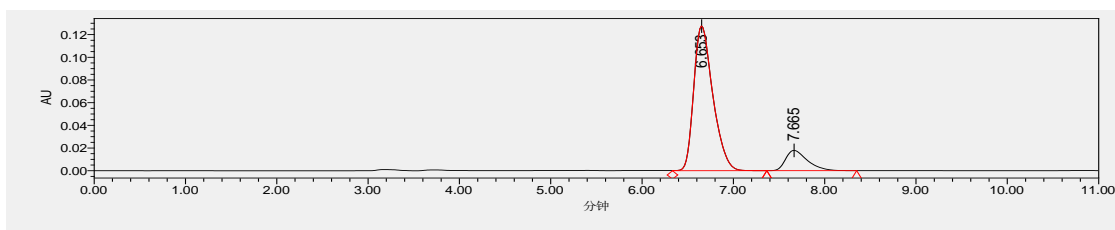

|   | Retention Time | Area    | % Area | Height |
|---|----------------|---------|--------|--------|
| 1 | 6.653          | 1854717 | 86.26  | 127727 |
| 2 | 7.665          | 295467  | 13.74  | 17896  |

### dimethyl 2-((4-benzyl-5-morpholinooxazol-2-yl)(phenyl)methyl)malonate **3aa**

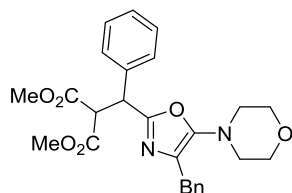

( $C_{26}H_{28}N_2O_6$ ) yellow oil; 85% yield, 86% *ee*.  $[\alpha]_D^{20} = -54.4$  (*c* 1.00 in  $CH_2Cl_2$ ). HPLC DAICEL CHIRALCEL IA, n-hexane/2-propanol = 85/15, flow rate = 1.0 mL/min,  $\lambda = 254$  nm, retention time: 6.20 min (minor), 6.78 min (major).  $^1H$  NMR (400



MHz, CDCl<sub>3</sub>) δ 7.24 – 7.15 (m, 7H), 7.14 – 7.04 (m, 3H), 4.67 (d, *J* = 11.9 Hz, 1H), 4.32 (d, *J* = 11.9 Hz, 1H), 3.71 (s, 2H), 3.59 (dd, *J* = 5.2, 4.2 Hz, 4H), 3.52 (s, 3H), 3.39 (s, 3H), 2.82 (dd, *J* = 5.2, 4.3 Hz, 4H). <sup>13</sup>C NMR (100 MHz, CDCl<sub>3</sub>) δ 167.91, 167.48, 157.74, 152.20, 139.62, 136.37, 128.70, 128.40, 128.38, 128.29, 127.85, 126.06, 124.37, 66.83, 56.19, 52.73, 52.53, 50.99, 45.03, 31.58. ESI-HRMS: calcd for C<sub>26</sub>H<sub>28</sub>N<sub>2</sub>NaO<sub>6</sub><sup>+</sup> ([M+Na<sup>+</sup>]) 487.1840, found 487.1847.

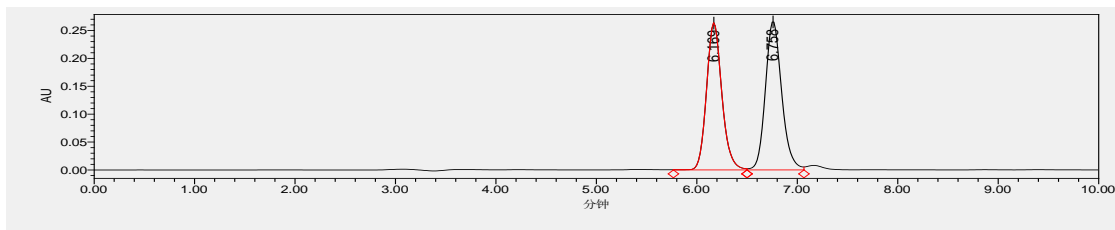

|   | Retention Time | Area    | % Area | Height |
|---|----------------|---------|--------|--------|
| 1 | 6.169          | 2786715 | 48.20  | 263673 |
| 2 | 6.758          | 2995297 | 51.80  | 266757 |

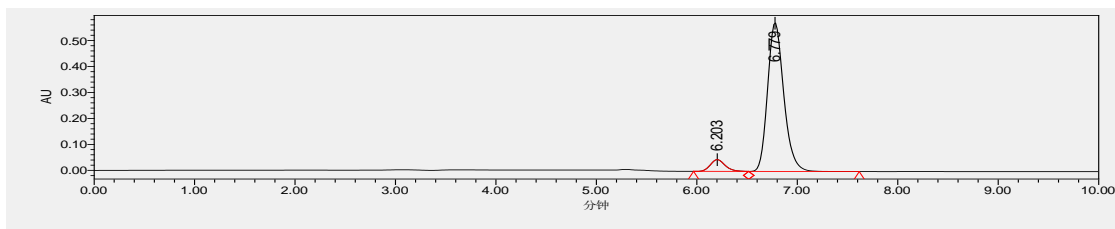

|   | Retention Time | Area    | % Area | Height |
|---|----------------|---------|--------|--------|
| 1 | 6.203          | 463594  | 6.75   | 45526  |
| 2 | 6.779          | 6404518 | 93.25  | 572680 |

### dimethyl 2-((5-morpholino-4-phenyloxazol-2-yl)(phenyl)methyl)malonate **3ab**

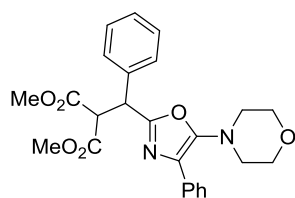

(C<sub>25</sub>H<sub>26</sub>N<sub>2</sub>O<sub>6</sub>) white solid; 97% yield, 86% *ee*. [α]<sub>D</sub><sup>20</sup> = -127.7 (c 0.83 in CH<sub>2</sub>Cl<sub>2</sub>). HPLC DAICEL CHIRALCEL ID, n-hexane/2-propanol = 80/20, flow rate = 1.0 mL/min, λ = 254 nm, retention time: 9.06 min (minor), 12.13 min (major). <sup>1</sup>H NMR (400 MHz, CDCl<sub>3</sub>) δ 7.84 (dd, *J* = 8.2, 1.0 Hz, 2H), 7.35 – 7.11 (m, 8H), 4.73 (d, *J* = 11.8 Hz, 1H), 4.41 (d, *J* = 11.8 Hz, 1H), 3.71 (t, *J* = 4.7 Hz, 4H), 3.65 (s, 3H), 3.40 (s, 3H), 3.02 – 2.89 (m, 4H). <sup>13</sup>C NMR (100 MHz, CDCl<sub>3</sub>) δ 168.00, 167.51, 157.62, 151.10, 136.27, 131.96, 128.72, 128.45, 128.39, 127.93, 126.88, 125.91, 123.94, 66.89, 56.28, 52.90, 52.89, 52.56, 50.34, 44.97. ESI-HRMS: calcd for C<sub>25</sub>H<sub>26</sub>N<sub>2</sub>NaO<sub>6</sub><sup>+</sup> ([M+Na<sup>+</sup>]) 473.1683, found 473.1688.

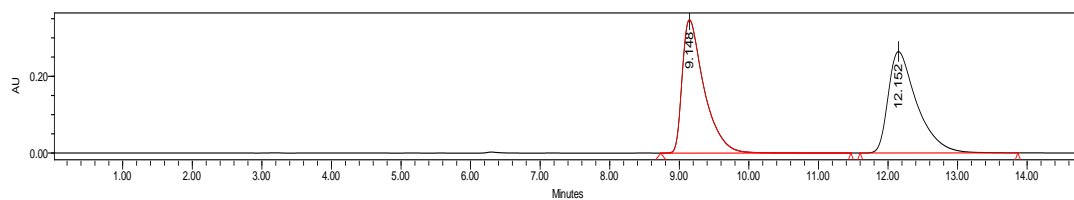

|   | Retention Time | Area    | % Area | Height |
|---|----------------|---------|--------|--------|
| 1 | 9.148          | 7573212 | 50.08  | 347786 |

|   |        |         |       |        |
|---|--------|---------|-------|--------|
| 2 | 12.152 | 7549125 | 49.92 | 264411 |
|---|--------|---------|-------|--------|

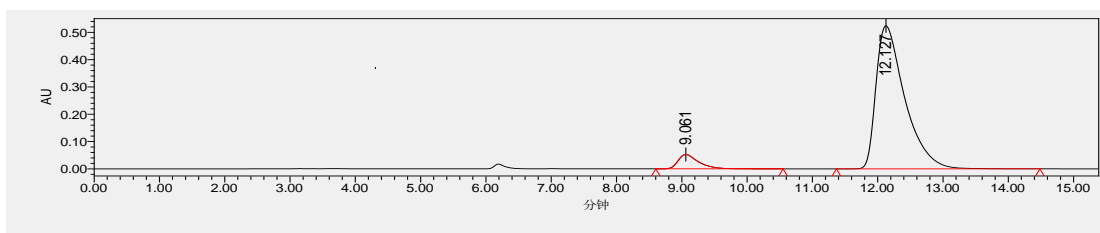

|   | Retention Time | Area     | % Area | Height |
|---|----------------|----------|--------|--------|
| 1 | 9.061          | 1146884  | 6.68   | 52660  |
| 2 | 12.127         | 16023868 | 93.32  | 524207 |

### dimethyl 2-((4-methyl-5-morpholinooxazol-2-yl)(phenyl)methyl)malonate **3ac**

C20H24N2O6 colorless oil; 60% yield, 86% *ee*.  $[\alpha]_D^{20} = -73.9$  (c 0.56 in  $\text{CH}_2\text{Cl}_2$ ). HPLC DAICEL CHIRALCEL IC, n-hexane/2-propanol = 70/30, flow rate = 1.0 mL/min,  $\lambda = 254$  nm, retention time: 9.51 min (minor), 14.12 min (major).  $^1\text{H}$  NMR (400 MHz,  $\text{CDCl}_3$ )  $\delta$  7.34 – 7.21 (m, 5H), 4.72 (d,  $J = 11.9$  Hz, 1H), 4.40 (d,  $J = 11.9$  Hz, 1H), 3.79 – 3.64 (m, 7H), 3.46 (s, 3H), 3.00 – 2.89 (m, 4H), 2.05 (s, 3H).  $^{13}\text{C}$  NMR (100 MHz,  $\text{CDCl}_3$ )  $\delta$  167.94, 167.50, 157.13, 151.43, 136.46, 128.67, 128.34, 127.81, 121.23, 66.89, 55.95, 52.84, 52.52, 50.86, 44.93, 11.17. ESI-HRMS: calcd for  $\text{C}_{20}\text{H}_{24}\text{N}_2\text{NaO}_6^+$  ( $[\text{M}+\text{Na}^+]$ ) 411.1527, found 411.1529.

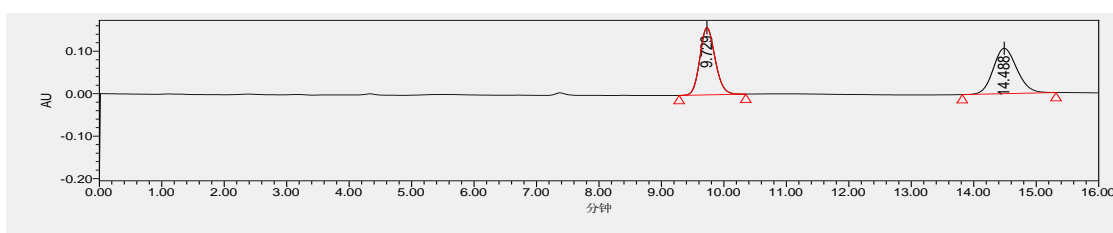

|   | Retention Time | Area    | % Area | Height |
|---|----------------|---------|--------|--------|
| 1 | 9.729          | 2682783 | 48.79  | 158303 |
| 2 | 14.488         | 2815380 | 51.21  | 106855 |

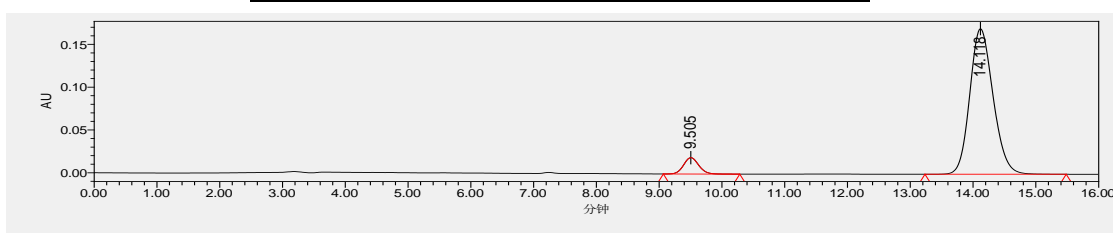

|   | Retention Time | Area    | % Area | Height |
|---|----------------|---------|--------|--------|
| 1 | 9.505          | 321493  | 6.84   | 19168  |
| 2 | 14.118         | 4375924 | 93.16  | 170055 |

### dimethyl 2-((4-isopropyl-5-morpholinooxazol-2-yl)(phenyl)methyl)malonate **3ad**

C22H28N2O6 yellow oil; 99% yield, 89% *ee*.  $[\alpha]_D^{20} = -65.8$  (c 0.88 in  $\text{CH}_2\text{Cl}_2$ ). HPLC DAICEL CHIRALCEL ID, n-hexane/2-propanol = 80/20, flow rate = 1.0 mL/min,  $\lambda = 254$  nm,

retention time: 7.18 min (major), 10.88 min (minor).  $^1\text{H}$  NMR (400 MHz,  $\text{CDCl}_3$ )  $\delta$  7.32 – 7.22 (m, 5H), 4.73 (d,  $J = 11.8$  Hz, 1H), 4.38 (d,  $J = 11.8$  Hz, 1H), 3.78 – 3.65 (m, 7H), 3.47 (s, 3H), 2.96 – 2.88 (m, 4H), 2.82 (dt,  $J = 13.8, 6.9$  Hz, 1H), 1.17 (dd,  $J = 9.3, 6.9$  Hz, 6H).  $^{13}\text{C}$  NMR (100 MHz,  $\text{CDCl}_3$ )  $\delta$  167.94, 167.51, 157.50, 150.11, 136.64, 132.18, 128.62, 128.39, 127.73, 66.94, 56.37, 52.71, 52.49, 51.53, 45.19, 25.32, 22.00, 21.75. ESI-HRMS: calcd for  $\text{C}_{22}\text{H}_{28}\text{N}_2\text{NaO}_6^+$  ( $[\text{M}+\text{Na}^+]$ ) 439.1840, found 439.1840.

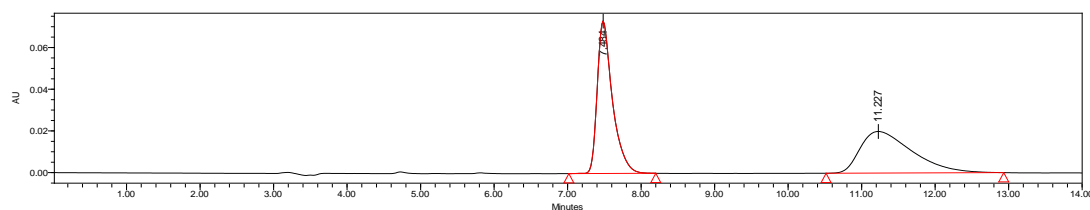

|   | Retention Time | Area    | % Area | Height |
|---|----------------|---------|--------|--------|
| 1 | 7.484          | 1047484 | 51.73  | 73126  |
| 2 | 11.227         | 977237  | 48.27  | 19938  |

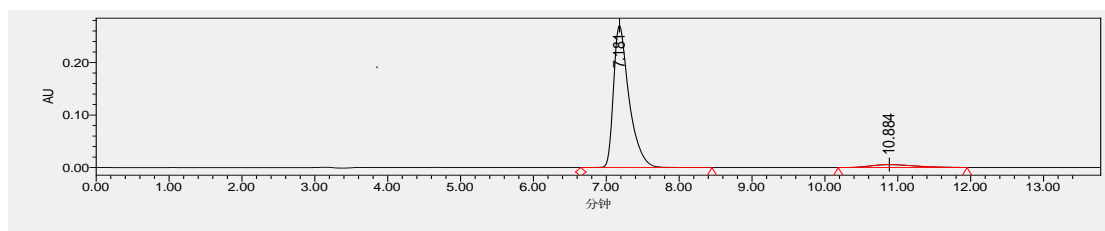

|   | Retention Time | Area    | % Area | Height |
|---|----------------|---------|--------|--------|
| 1 | 7.181          | 4007767 | 94.52  | 270763 |
| 2 | 10.884         | 232570  | 5.48   | 5487   |

### dimethyl 2-((4-benzyl-5-(piperidin-1-yl)oxazol-2-yl)(phenyl)methyl)malonate 3af

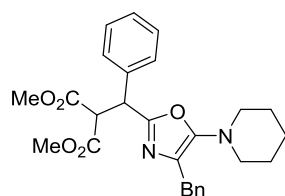

( $\text{C}_{27}\text{H}_{30}\text{N}_2\text{O}_5$ ) yellow oil; 86% yield, 86% *ee*.  $[\alpha]_{\text{D}}^{20} = -77.9$  ( $c$  0.89 in  $\text{CH}_2\text{Cl}_2$ ). HPLC DAICEL CHIRALCEL ID, *n*-hexane/2-propanol = 90/10, flow rate = 1.0 mL/min,  $\lambda = 254$  nm, retention time: 9.89 min (major), 10.93 min (minor).  $^1\text{H}$  NMR (400 MHz,  $\text{CDCl}_3$ )  $\delta$  7.33 – 7.12 (m, 10H), 4.73 (d,  $J = 12.0$  Hz, 1H), 4.39 (d,  $J = 12.0$  Hz, 1H), 3.77 (d,  $J = 1.5$  Hz, 2H), 3.57 (s, 3H), 3.45 (s, 3H), 2.95 – 2.79 (m, 4H), 1.64 – 1.33 (m, 6H).  $^{13}\text{C}$  NMR (100 MHz,  $\text{CDCl}_3$ )  $\delta$  167.90, 167.58, 157.07, 153.70, 140.01, 136.61, 128.64, 128.43, 128.40, 128.20, 127.73, 125.88, 123.10, 56.27, 52.68, 52.49, 52.06, 45.09, 31.61, 25.86, 23.84. ESI-HRMS: calcd for  $\text{C}_{27}\text{H}_{30}\text{N}_2\text{NaO}_5^+$  ( $[\text{M}+\text{Na}^+]$ ) 485.2047, found 485.2050.

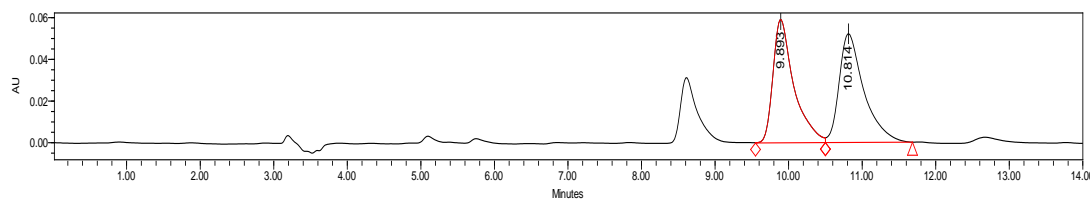

|   | Retention Time | Area    | % Area | Height |
|---|----------------|---------|--------|--------|
| 1 | 9.893          | 1168417 | 48.97  | 59174  |

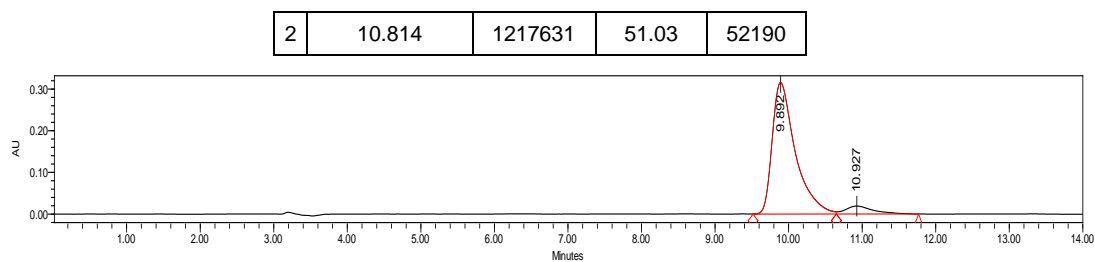

|   | Retention Time | Area    | % Area | Height |
|---|----------------|---------|--------|--------|
| 1 | 9.892          | 6873579 | 93.13  | 316215 |
| 2 | 10.927         | 507218  | 6.87   | 19211  |

**dimethyl 2-((4-(tert-butyl)-5-(piperidin-1-yl)oxazol-2-yl)(phenyl)methyl)malonate 3ag**

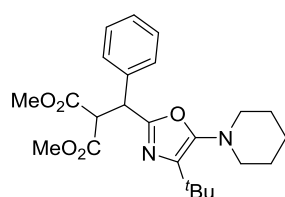

( $C_{24}H_{32}N_2O_5$ ) colorless oil; 91% yield, 91% *ee*.  $[\alpha]_D^{20} = -58.4$  (*c* 0.75 in  $CH_2Cl_2$ ). HPLC DAICEL CHIRALCEL ID, n-hexane/2-propanol = 90/10, flow rate = 1.0 mL/min,  $\lambda = 254$  nm, retention time: 4.91 min (major), 6.13 min (minor).  $^1H$  NMR (400 MHz,  $CDCl_3$ )  $\delta$  7.23 – 7.14 (m, 5H), 4.64 (d, *J* = 11.8 Hz, 1H), 4.28 (d, *J* = 11.8 Hz, 1H), 3.61 (s, 3H), 3.40 (s, 3H), 2.73 (t, *J* = 5.3 Hz, 4H), 1.56 – 1.36 (m, 6H), 1.17 (s, 9H).  $^{13}C$  NMR (100 MHz,  $CDCl_3$ )  $\delta$  166.96, 166.64, 155.75, 150.45, 135.94, 133.79, 127.52, 127.42, 126.58, 55.64, 51.87, 51.65, 51.43, 44.28, 30.30, 28.56, 24.90, 22.84. ESI-HRMS: calcd for  $C_{24}H_{32}N_2NaO_5^+$  ( $[M+Na^+]$ ) 451.2203, found 451.2204.

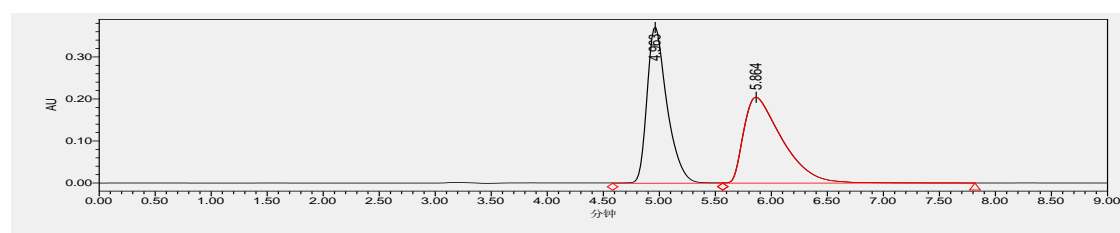

|   | Retention Time | Area    | % Area | Height |
|---|----------------|---------|--------|--------|
| 1 | 4.963          | 4609347 | 48.56  | 371402 |
| 2 | 5.864          | 4883484 | 51.44  | 204594 |

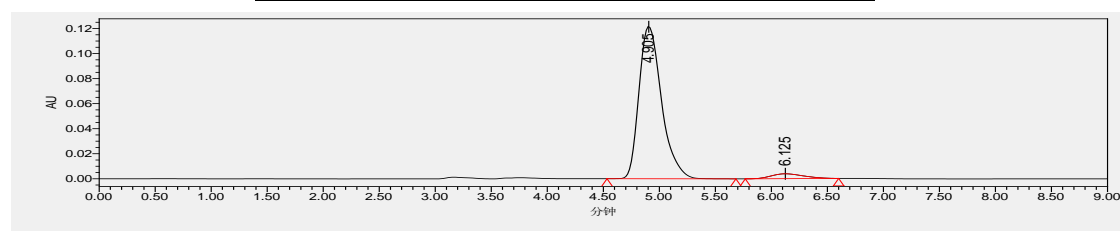

|   | Retention Time | Area    | % Area | Height |
|---|----------------|---------|--------|--------|
| 1 | 4.905          | 1701597 | 95.64  | 121817 |
| 2 | 6.125          | 77639   | 4.36   | 3878   |

**dimethyl 2-((4-(tert-butyl)-5-(pyrrolidin-1-yl)oxazol-2-yl)(phenyl)methyl)malonate 3ah**

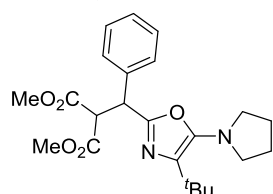

( $C_{23}H_{30}N_2O_5$ ) yellow oil; 80% yield, 91% *ee*.  $[\alpha]_D^{20} = -70.2$  (*c* 0.75 in  $CH_2Cl_2$ ). HPLC DAICEL CHIRALCEL ID, n-hexane/2-propanol = 90/10, flow rate = 1.0 mL/min,  $\lambda = 254$  nm, retention time: 5.08

min (major), 7.56 min (minor).  $^1\text{H}$  NMR (400 MHz,  $\text{CDCl}_3$ )  $\delta$  7.25 – 7.13 (m, 5H), 4.64 (d,  $J$  = 11.8 Hz, 1H), 4.30 (d,  $J$  = 11.8 Hz, 1H), 3.62 (s, 3H), 3.40 (s, 3H), 3.00 – 2.83 (m, 4H), 1.82 – 1.71 (m, 4H), 1.16 (s, 9H).  $^{13}\text{C}$  NMR (100 MHz,  $\text{CDCl}_3$ )  $\delta$  168.04, 167.67, 156.71, 148.51, 136.99, 136.46, 128.54, 128.45, 127.60, 56.61, 52.67, 52.44, 45.31, 31.31, 29.51, 25.37. ESI-HRMS: calcd for  $\text{C}_{23}\text{H}_{30}\text{N}_2\text{NaO}_5^+$  ( $[\text{M}+\text{Na}^+]$ ) 437.2047, found 437.2048.

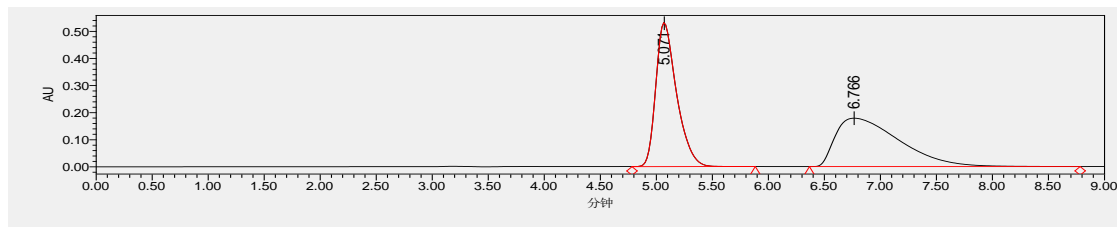

|   | Retention Time | Area    | % Area | Height |
|---|----------------|---------|--------|--------|
| 1 | 5.071          | 6838875 | 49.10  | 531646 |
| 2 | 6.766          | 7090215 | 50.90  | 178577 |

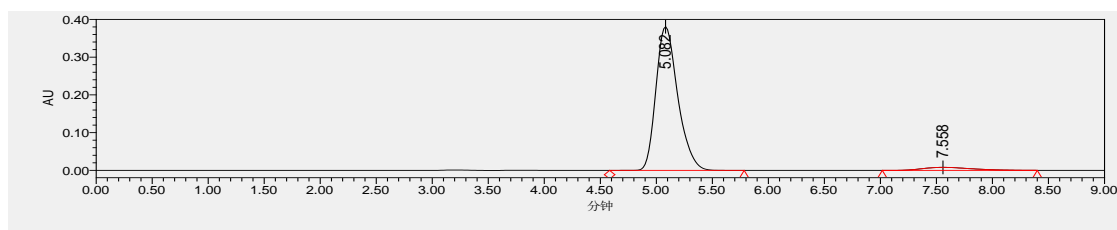

|   | Retention Time | Area    | % Area | Height |
|---|----------------|---------|--------|--------|
| 1 | 5.082          | 5160759 | 95.47  | 380707 |
| 2 | 7.558          | 245092  | 4.53   | 7987   |

### dimethyl 2-((5-morpholinooxazol-2-yl)(phenyl)methyl)malonate **3ai**

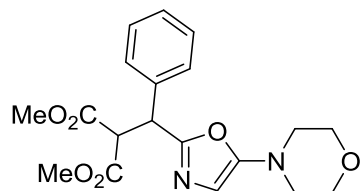

( $\text{C}_{19}\text{H}_{22}\text{N}_2\text{O}_6$ ) colorless oil; 62% yield, 87% *ee*.  $[\alpha]_{\text{D}}^{20} = -46.3$  ( $c$  0.46 in  $\text{CH}_2\text{Cl}_2$ ). HPLC DAICEL CHIRALCEL IE, n-hexane/2-propanol = 80/20, flow rate = 1.0 mL/min,  $\lambda = 254$  nm, retention time: 11.77 min (major), 15.03 min (minor).  $^1\text{H}$  NMR (400 MHz,  $\text{CDCl}_3$ )  $\delta$  7.34 – 7.22 (m, 5H), 5.95 (s, 1H), 4.75 (d,  $J$  = 11.9 Hz, 1H), 4.38 (d,  $J$  = 11.9 Hz, 1H), 3.80 – 3.68 (m, 7H), 3.46 (s, 3H), 3.08 – 2.91 (m, 4H).  $^{13}\text{C}$  NMR (100 MHz,  $\text{CDCl}_3$ )  $\delta$  167.95, 167.46, 157.33, 155.76, 136.40, 128.72, 128.32, 127.88, 102.86, 65.93, 56.06, 52.95, 52.55, 48.22, 44.61. ESI-HRMS: calcd for  $\text{C}_{19}\text{H}_{22}\text{N}_2\text{NaO}_6^+$  ( $[\text{M}+\text{Na}^+]$ ) 397.1370, found 397.1375.

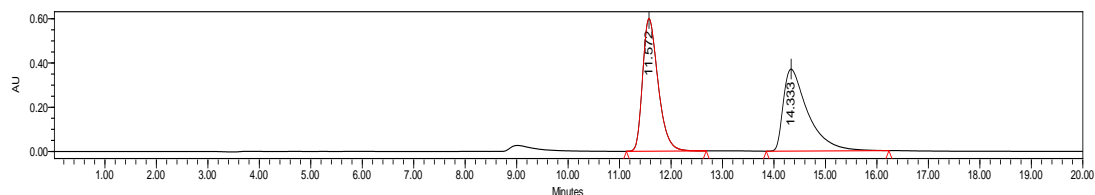

|   | Retention Time | Area     | % Area | Height |
|---|----------------|----------|--------|--------|
| 1 | 11.572         | 12484962 | 50.46  | 600637 |
| 2 | 14.333         | 12257930 | 49.54  | 370393 |

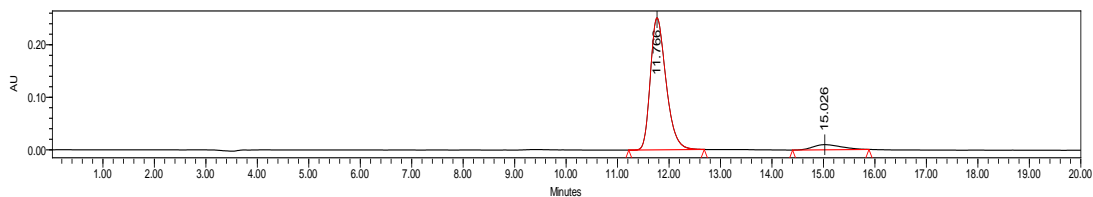

|   | Retention Time | Area    | % Area | Height |
|---|----------------|---------|--------|--------|
| 1 | 11.766         | 5316102 | 93.44  | 251654 |
| 2 | 15.026         | 373190  | 6.56   | 9809   |

### 2-((4-(tert-butyl)-5-morpholinooxazol-2-yl)(phenyl)methyl)propane-1,3-diol 5

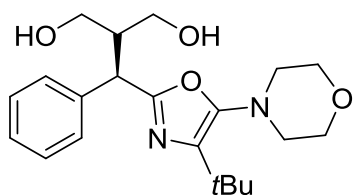

( $C_{21}H_{30}N_2O_4$ ) yellow oil; 90% yield, 95% *ee*. HPLC DAICEL CHIRALCEL IC, n-hexane/2-propanol = 70/30, flow rate = 1.0 mL/min,  $\lambda = 210$  nm, retention time: 6.25 min (major), 7.45 min (minor).  $^1H$  NMR (400 MHz,  $CDCl_3$ )  $\delta$  7.31 – 7.22 (m, 2H), 7.21 – 7.15 (m, 3H), 4.87 (s, 1H), 4.32 (d,  $J = 7.6$  Hz, 1H), 3.85 (d,  $J = 12.1$  Hz, 1H), 3.71 – 3.41 (m, 8H), 2.87 – 2.74 (m, 4H), 2.33 – 2.22 (m, 1H), 1.22 (s, 9H).  $^{13}C$  NMR (100 MHz,  $CDCl_3$ )  $\delta$  159.67, 150.02, 138.31, 135.29, 128.68, 128.46, 127.22, 66.91, 62.23, 61.48, 56.59, 51.89, 46.86, 45.08, 31.33, 29.66. ESI-HRMS: calcd for  $C_{21}H_{30}N_2NaO_4^+$  ( $[M+Na^+]$ ) 397.2098, found 397.2096.

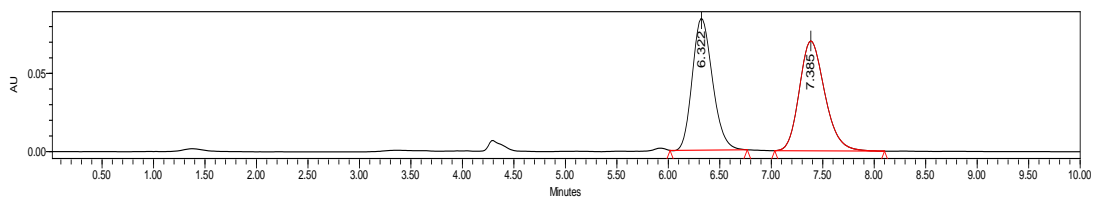

|   | Retention Time | Area    | % Area | Height |
|---|----------------|---------|--------|--------|
| 1 | 6.322          | 1149075 | 48.82  | 84354  |
| 2 | 7.385          | 1204602 | 51.18  | 70266  |

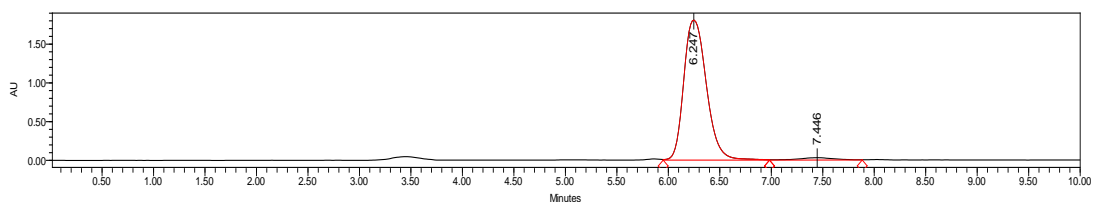

|   | Retention Time | Area     | % Area | Height  |
|---|----------------|----------|--------|---------|
| 1 | 6.247          | 27600153 | 97.43  | 1806916 |
| 2 | 7.446          | 727763   | 2.57   | 30209   |

### dimethyl

### 2-(2-((3,3-dimethyl-1-morpholino-1-oxobutan-2-yl)amino)-2-oxo-1-phenylethyl)malonate 6

6

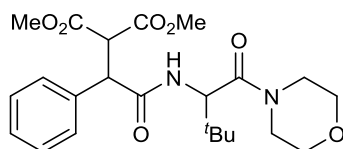

( $C_{23}H_{32}N_2O_7$ ) white solid; 99% yield, 1.8:1 d.r., 99% *ee*. (major), 97% *ee*. (minor); HPLC DAICEL CHIRALCEL IB,

n-hexane/2-propanol = 90/10, flow rate = 1.0 mL/min,  $\lambda = 210$  nm, retention time:  $t_1 = 6.89$  min,  $t_2 = 8.17$  min,  $t_3 = 10.19$ ,  $t_4 = 11.82$ .  $^1\text{H}$  NMR (400 MHz, THF)  $\delta$  7.62 (d,  $J = 9.7$  Hz, 1H), 7.18 – 6.98 (m, 5H), 4.19 (dt,  $J = 25.2, 10.3$  Hz, 3H), 3.54 (s, 3H), 3.50 – 3.41 (m, 4H), 3.22 (s, 5H), 3.14 – 2.98 (m, 2H), 0.89 (s, 9H).  $^{13}\text{C}$  NMR (100 MHz, THF)  $\delta$  170.40, 168.94, 167.96, 167.59, 136.92, 128.31, 128.02, 127.28, 55.04, 53.89, 51.70, 51.25, 46.40, 41.85, 35.40, 26.04. ESI-HRMS: calcd for  $\text{C}_{23}\text{H}_{32}\text{N}_2\text{NaO}_7^+$  ( $[\text{M}+\text{Na}^+]$ ) 471.2102, found 471.2105.

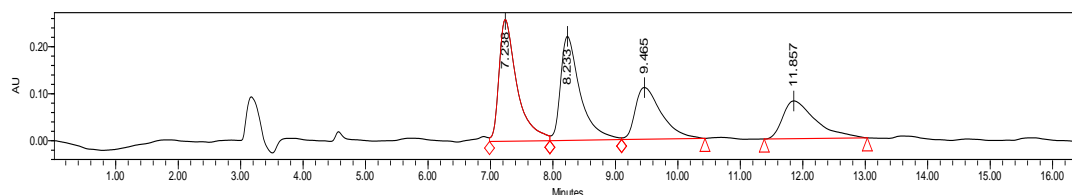

|   | Retention Time | Area    | % Area | Height |
|---|----------------|---------|--------|--------|
| 1 | 7.238          | 5215360 | 32.21  | 259409 |
| 2 | 8.233          | 4832726 | 29.85  | 221306 |
| 3 | 9.465          | 3196685 | 19.74  | 110132 |
| 4 | 11.857         | 2947336 | 18.20  | 80410  |

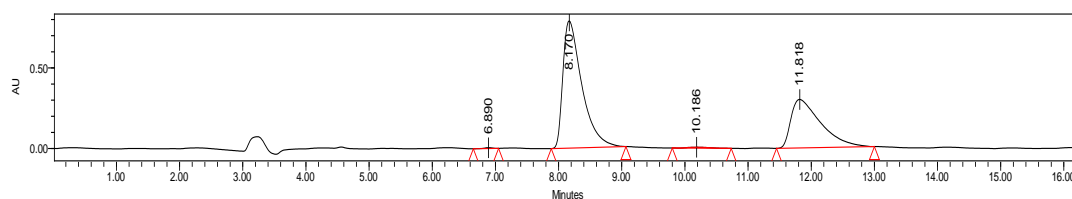

|   | Retention Time | Area     | % Area | Height |
|---|----------------|----------|--------|--------|
| 1 | 6.890          | 43420    | 0.16   | 5132   |
| 2 | 8.170          | 16433517 | 62.13  | 789711 |
| 3 | 10.186         | 132198   | 0.50   | 5423   |
| 4 | 11.818         | 9840801  | 37.21  | 301073 |

### dimethyl 2-(2-oxo-1-phenyl-2-pivalamidoethyl)malonate **7**

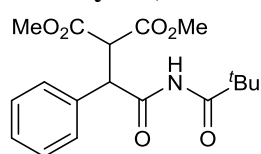

( $\text{C}_{18}\text{H}_{23}\text{NO}_6$ ) colorless oil; 51% yield, 98% *ee*. HPLC DAICEL CHIRALCEL IE, n-hexane/2-propanol = 70/30, flow rate = 1.0 mL/min,  $\lambda = 210$  nm, retention time: 7.48 min (minor), 12.27 min (major).  $^1\text{H}$  NMR (400 MHz,  $\text{CDCl}_3$ )  $\delta$  8.32 (s, 1H), 7.39 – 7.21 (m, 5H), 5.41 (d,  $J = 11.7$  Hz, 1H), 4.32 (d,  $J = 11.7$  Hz, 1H), 3.74 (s, 3H), 3.45 (s, 3H), 1.15 (s, 9H).  $^{13}\text{C}$  NMR (100 MHz,  $\text{CDCl}_3$ )  $\delta$  176.29, 174.04, 168.47, 167.57, 133.86, 129.16, 128.65, 128.17, 55.59, 52.91, 52.46, 50.63, 40.18, 26.77. ESI-HRMS: calcd for  $\text{C}_{18}\text{H}_{23}\text{KNO}_6^+$  ( $[\text{M}+\text{K}^+]$ ) 388.1157, found 388.1163.

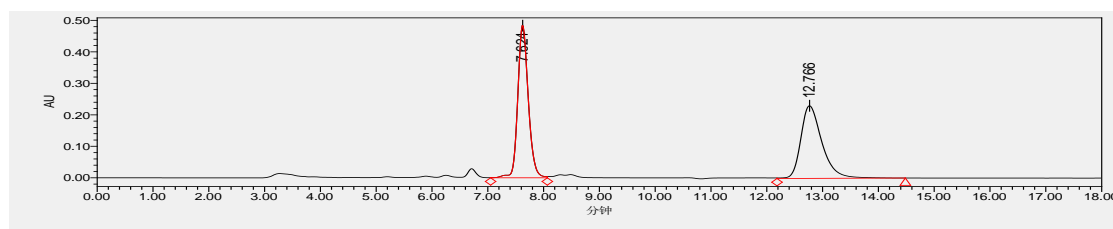

|   | Retention Time | Area    | % Area | Height |
|---|----------------|---------|--------|--------|
| 1 | 7.624          | 6345924 | 51.11  | 485427 |
| 2 | 12.766         | 6069786 | 48.89  | 230987 |

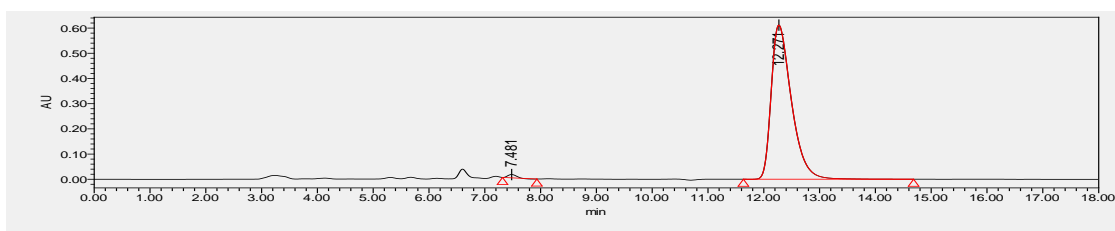

|   | Retention Time | Area     | % Area | Height |
|---|----------------|----------|--------|--------|
| 1 | 7.481          | 154136   | 0.99   | 13318  |
| 2 | 12.271         | 15387661 | 99.01  | 612158 |

### methyl (R)-4-oxo-3-phenyl-4-pivalamidobutanoate **8**

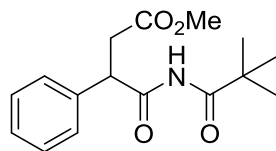

( $C_{16}H_{21}NO_4$ ) yellow solid; 47% yield, 0% *ee*. HPLC DAICEL CHIRALCEL IB, n-hexane/2-propanol = 80/20, flow rate = 1.0 mL/min,  $\lambda$  = 210 nm, retention time: 6.26 min (minor), 7.22 min (major).  $^1H$  NMR (400 MHz,  $CDCl_3$ )  $\delta$  8.22 (s, 1H), 7.37 – 7.23 (m, 5H), 5.11 (dd,  $J$  = 10.4, 4.8 Hz, 1H), 3.66 (s, 3H), 3.29 (dd,  $J$  = 17.2, 10.4 Hz, 1H), 2.63 (dd,  $J$  = 17.2, 4.8 Hz, 1H), 1.13 (s, 9H).  $^{13}C$  NMR (100 MHz,  $CDCl_3$ )  $\delta$  176.29, 174.96, 172.20, 137.24, 128.83, 128.40, 127.67, 51.85, 47.43, 40.17, 38.09, 26.82. ESI-HRMS: calcd for  $C_{16}H_{21}NNaO_4^+$  ( $[M+Na^+]$ ) 314.1363, found 314.1373.

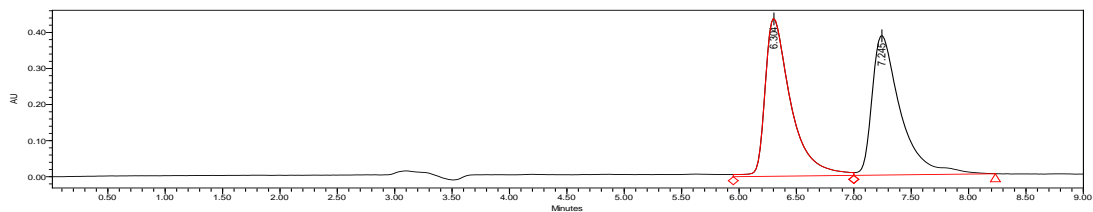

|   | Retention Time | Area    | % Area | Height |
|---|----------------|---------|--------|--------|
| 1 | 6.304          | 6835053 | 50.63  | 438171 |
| 2 | 7.245          | 6664086 | 49.37  | 386695 |

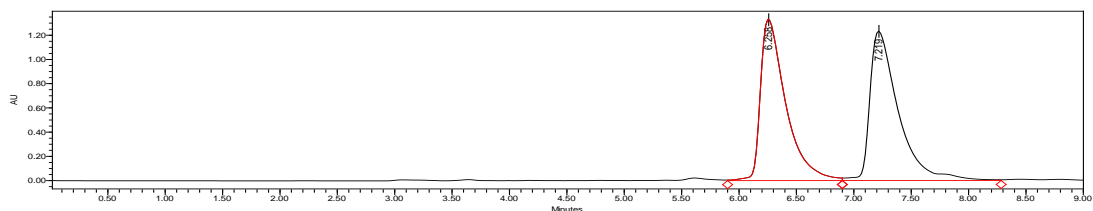

|   | Retention Time | Area     | % Area | Height  |
|---|----------------|----------|--------|---------|
| 1 | 6.258          | 20409465 | 49.02  | 1337155 |
| 2 | 7.219          | 21223222 | 50.98  | 1233388 |

### methyl 3-(5-morpholino-4-phenyloxazol-2-yl)-3-phenylpropanoate **9**

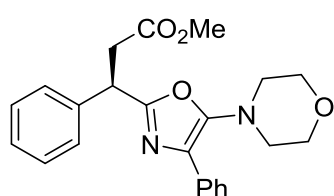

( $C_{23}H_{24}N_2O_4$ ) yellow solid; 99% yield, 95% *ee*. HPLC DAICEL



CHIRALCEL ID, n-hexane/2-propanol = 95/5, flow rate = 1.0 mL/min,  $\lambda = 254$  nm, retention time: 11.68 min (minor), 13.25 min (major).  $^1\text{H}$  NMR (400 MHz,  $\text{CDCl}_3$ )  $\delta$  7.94 (d,  $J = 8.1$  Hz, 2H), 7.37 (t,  $J = 7.7$  Hz, 2H), 7.29 (dd,  $J = 9.3, 3.9$  Hz, 4H), 7.26 – 7.17 (m, 2H), 4.60 (dd,  $J = 8.4, 7.0$  Hz, 1H), 3.84 – 3.70 (m, 4H), 3.62 (s, 3H), 3.39 (dd,  $J = 16.4, 8.6$  Hz, 1H), 3.08 – 2.98 (m, 4H), 2.94 (dd,  $J = 16.4, 6.8$  Hz, 1H).  $^{13}\text{C}$  NMR (100 MHz,  $\text{CDCl}_3$ )  $\delta$  170.67, 157.74, 149.95, 138.33, 130.95, 127.73, 127.33, 126.67, 126.35, 125.79, 124.87, 122.79, 65.81, 50.76, 49.27, 40.50, 37.99. ESI-HRMS: calcd for  $\text{C}_{23}\text{H}_{24}\text{N}_2\text{NaO}_4^+$  ( $[\text{M}+\text{Na}^+]$ ) 415.1628, found 415.1630.

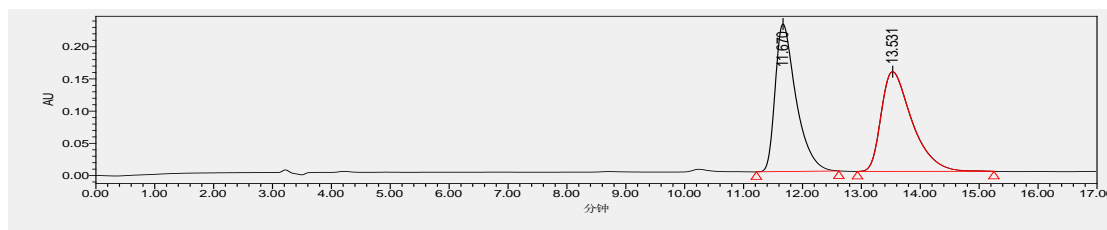

|   | Retention Time | Area    | % Area | Height |
|---|----------------|---------|--------|--------|
| 1 | 11.670         | 5622924 | 49.96  | 229282 |
| 2 | 13.531         | 5633001 | 50.04  | 154889 |

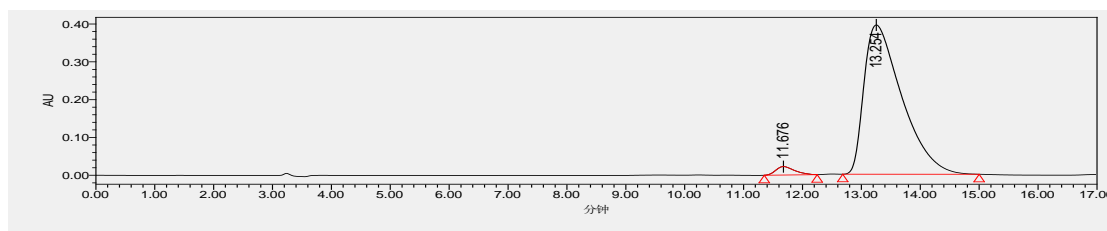

|   | Retention Time | Area     | % Area | Height |
|---|----------------|----------|--------|--------|
| 1 | 11.676         | 496466   | 2.74   | 22378  |
| 2 | 13.254         | 17639663 | 97.26  | 394756 |

### methyl (R)-4-benzamido-4-oxo-3-phenylbutanoate 10

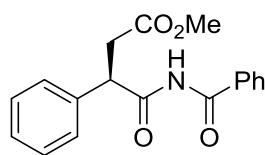

( $\text{C}_{18}\text{H}_{17}\text{NO}_4$ ) yellow oil; 70% yield, 94% *ee*. HPLC DAICEL CHIRALCEL ID, n-hexane/2-propanol = 70/30, flow rate = 1.0 mL/min,  $\lambda = 210$  nm, retention time: 14.15 min (major), 17.94 min (minor).  $^1\text{H}$  NMR (400 MHz,  $\text{CDCl}_3$ )  $\delta$  9.19 (s, 1H), 7.82 – 7.71 (m, 2H), 7.54 (t,  $J = 7.4$  Hz, 1H), 7.41 (dd,  $J = 9.4, 7.6$  Hz, 4H), 7.35 – 7.24 (m, 3H), 5.25 (dd,  $J = 10.6, 4.6$  Hz, 1H), 3.64 (s, 3H), 3.34 (dd,  $J = 17.2, 10.7$  Hz, 1H), 2.68 (dd,  $J = 17.2, 4.6$  Hz, 1H).  $^{13}\text{C}$  NMR (100 MHz,  $\text{CDCl}_3$ )  $\delta$  175.28, 172.39, 165.36, 137.04, 133.16, 132.72, 128.98, 128.79, 128.46, 127.88, 127.85, 51.97, 47.78, 38.25.

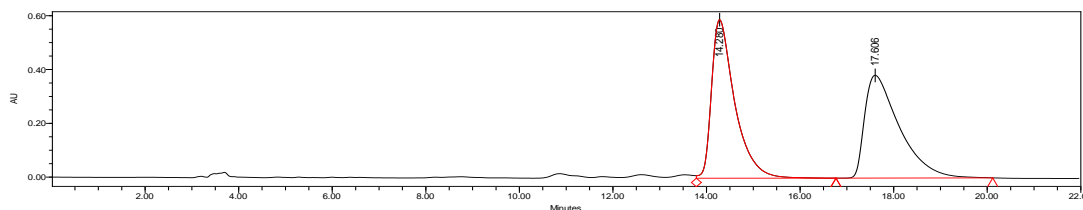

|   | Retention Time | Area     | % Area | Height |
|---|----------------|----------|--------|--------|
| 1 | 14.280         | 20285487 | 50.74  | 589449 |

|   |        |          |       |        |
|---|--------|----------|-------|--------|
| 2 | 17.606 | 19690357 | 49.26 | 382358 |
|---|--------|----------|-------|--------|

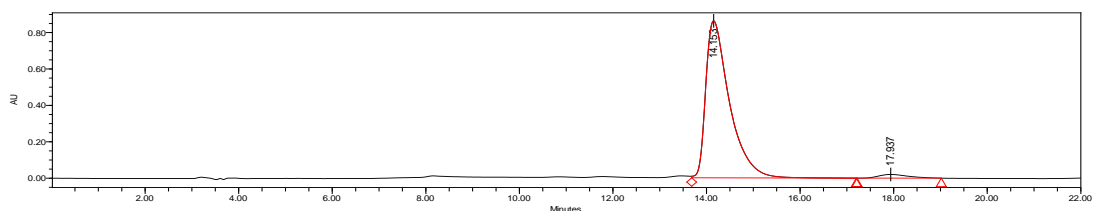

|   | Retention Time | Area     | % Area | Height |
|---|----------------|----------|--------|--------|
| 1 | 14.153         | 30317546 | 97.15  | 862515 |
| 2 | 17.937         | 889831   | 2.85   | 20326  |

### 3-(5-morpholino-4-phenyloxazol-2-yl)-3-phenylpropan-1-ol **11**

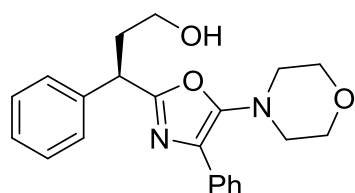

( $C_{22}H_{24}N_2O_3$ ) yellow oil; 47% yiled, 94% *ee*. HPLC DAICEL CHIRALCEL ID, n-hexane/2-propanol = 80/20, flow rate = 1.0 mL/min,  $\lambda = 210$  nm, retention time: 6.62 min (minor), 7.85 min (major).  $^1H$  NMR (400 MHz,  $CDCl_3$ )  $\delta$  7.91 (d,  $J = 7.5$  Hz, 2H), 7.42 – 7.21 (m, 8H), 4.31 (dd,  $J = 8.3, 6.2$  Hz, 1H), 3.91 – 3.76 (m, 4H), 3.75 – 3.60 (m, 2H), 3.50 (s, 1H), 3.12 – 2.96 (m, 4H), 2.54 – 2.37 (m, 1H), 2.26 (ddd,  $J = 13.5, 11.2, 6.5$  Hz, 1H).  $^{13}C$  NMR (100 MHz,  $CDCl_3$ )  $\delta$  160.26, 151.04, 140.14, 131.64, 128.76, 128.51, 127.87, 127.16, 127.03, 125.93, 123.41, 66.90, 60.19, 50.32, 43.31, 37.37. ESI-HRMS: calcd for  $C_{22}H_{24}N_2NaO_3^+$  ( $[M+Na^+]$ ) 387.1679, found 387.1678.

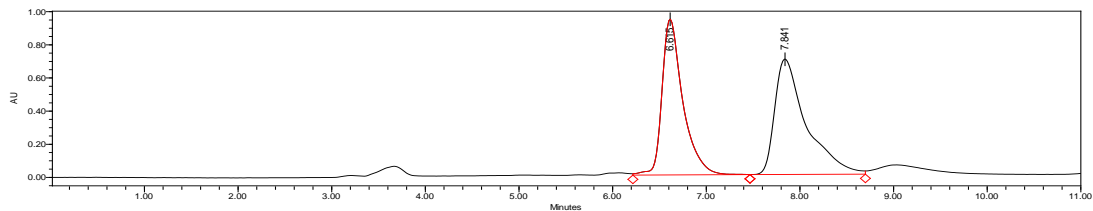

|   | Retention Time | Area     | % Area | Height |
|---|----------------|----------|--------|--------|
| 1 | 6.615          | 14505404 | 47.15  | 940299 |
| 2 | 7.841          | 16259844 | 52.85  | 697479 |

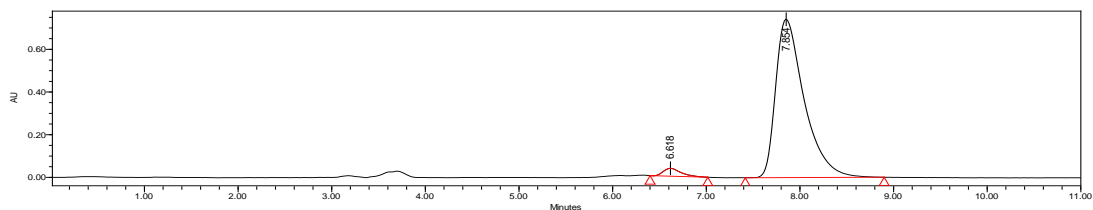

|   | Retention Time | Peak Type | Area     | % Area | Height |
|---|----------------|-----------|----------|--------|--------|
| 1 | 6.618          | Unknown   | 485523   | 3.00   | 37321  |
| 2 | 7.854          | Unknown   | 15683371 | 97.00  | 742908 |

### 4-(tert-butyl)-5-(piperidin-1-yl)oxazole **7**

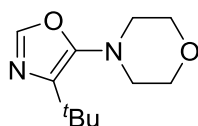

To a stirred solution of the isocyanoacetamide **2e** in DCM was added  $Sc(OTf)_3$  (10 mol%). Upon reaction completion, water was

added and the mixture was extracted with DCM. The combined organic layers were dried upon Na<sub>2</sub>SO<sub>4</sub>, concentrated *in vacuo*. The crude material was then purified by Flash Chromatography (SiO<sub>2</sub>, petroleum ether /AcOEt: 5/1) to give the desired oxazole **7** as a white powder.

(C<sub>12</sub>H<sub>18</sub>N<sub>2</sub>O) <sup>1</sup>H NMR (400 MHz, CDCl<sub>3</sub>) δ 7.51 (s, 1H), 3.77 – 3.64 (m, 4H), 2.98 – 2.83 (m, 4H), 1.24 (s, 9H). <sup>13</sup>C NMR (100 MHz, CDCl<sub>3</sub>) δ 149.03, 145.49, 134.42, 65.97, 50.88, 30.30, 28.64. SI-HRMS: calcd for C<sub>12</sub>H<sub>18</sub>N<sub>2</sub>NaO<sub>2</sub><sup>+</sup> ([M+Na<sup>+</sup>]) 233.1260, found 233.1273.

## 8. References

1. a) Y. H. Wen, X. Huang, J. L. Huang, Y. Xiong, B. Qin, X. M. Feng, *Synlett* **2005**, 2445; b) Z. P. Yu, X. H. Liu, Z. H. Dong, M. S. Xie, X. M. Feng, *Angew. Chem. Int. Ed.* **2008**, *47*, 1308; c) X. Zhou, D. J. Shang, Q. Zhang, L. L. Lin, X. H. Liu, X. M. Feng, *Org. Lett.* **2009**, *11*, 1401 and references therein.
2. O. Kaumanns, R. Lucius, H. Mayr, *Chem. Eur. J.* **2008**, *14*, 9675.
3. a) A. Fayol, C. Housseman, X. Sun, P. Janvier, H. Bienaymé, J. Zhu, *Synthesis* **2005**, 161; b) C. Housseman, J. Zhu, *Synlett* **2006**, 1777.

## 9. Copies of NMR spectra

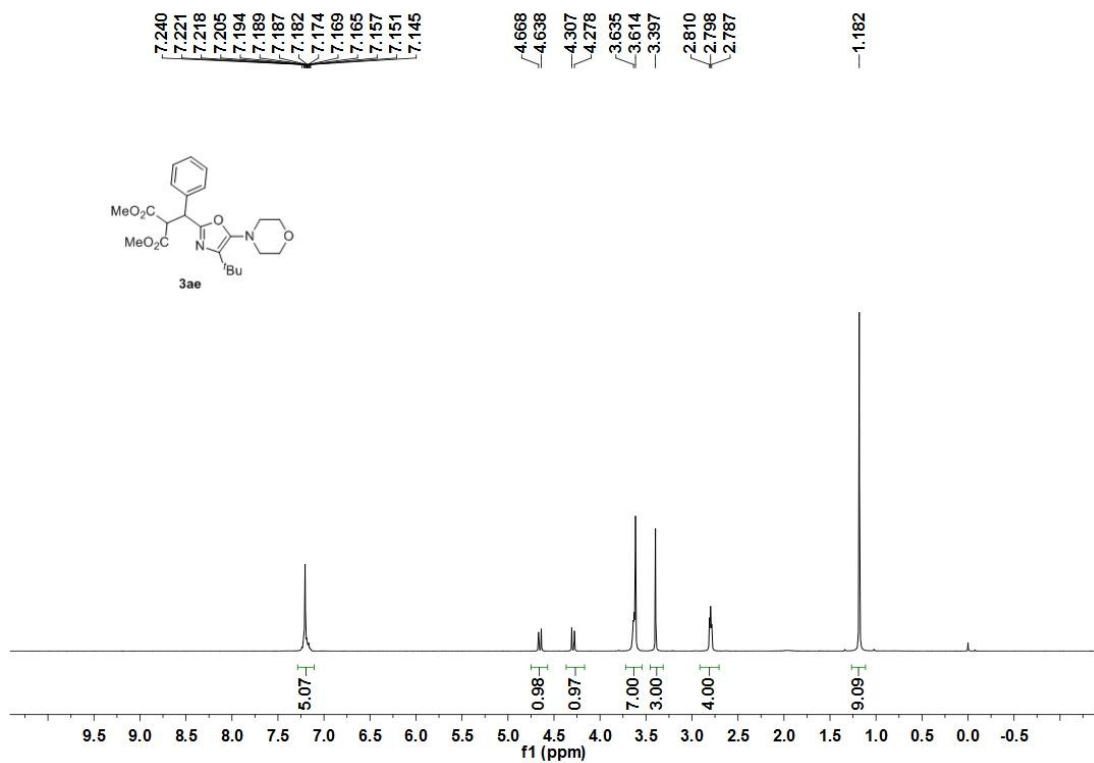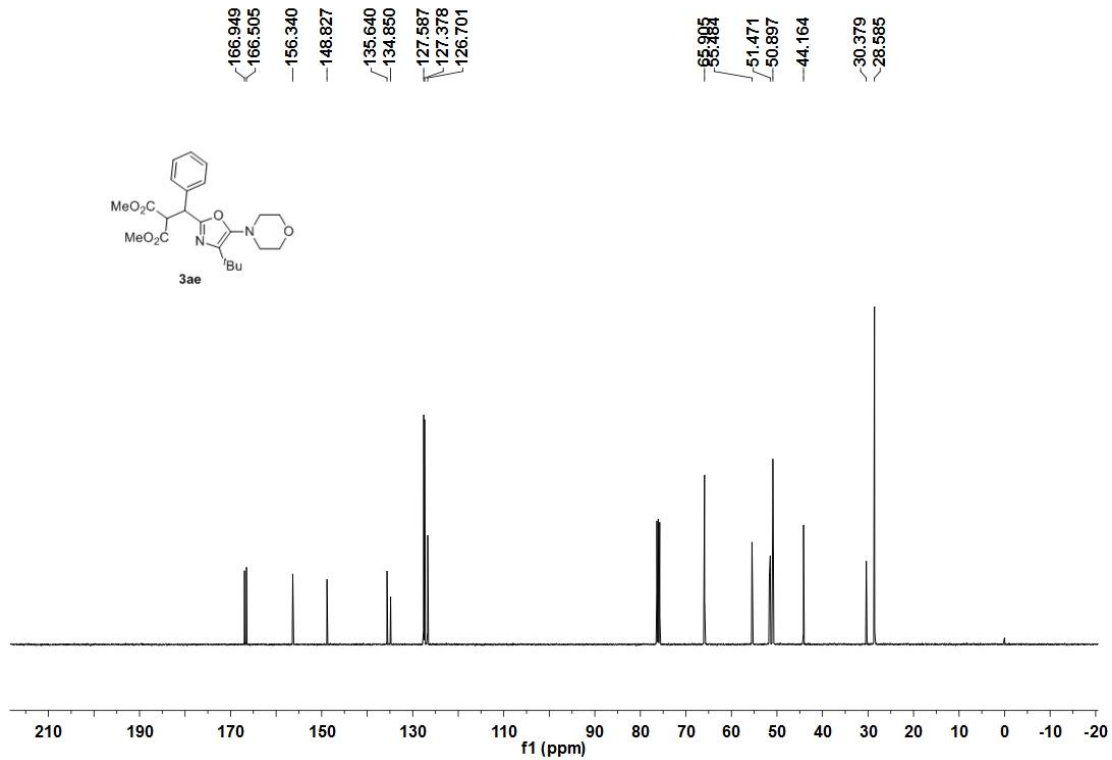

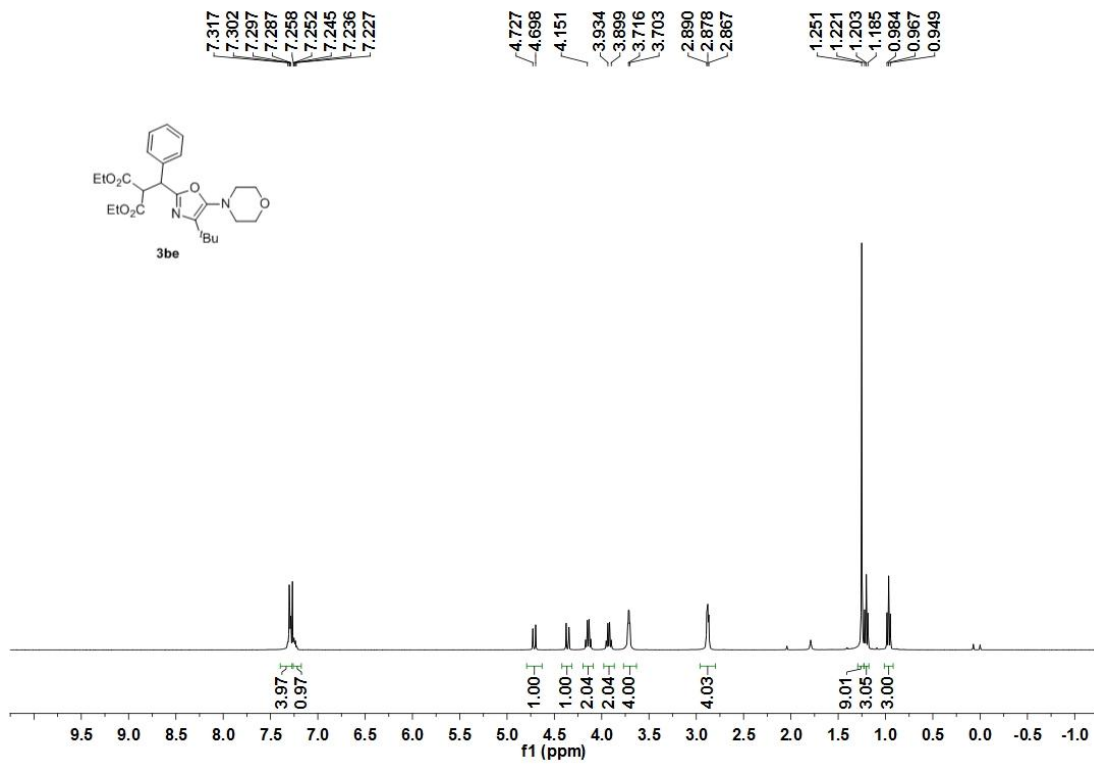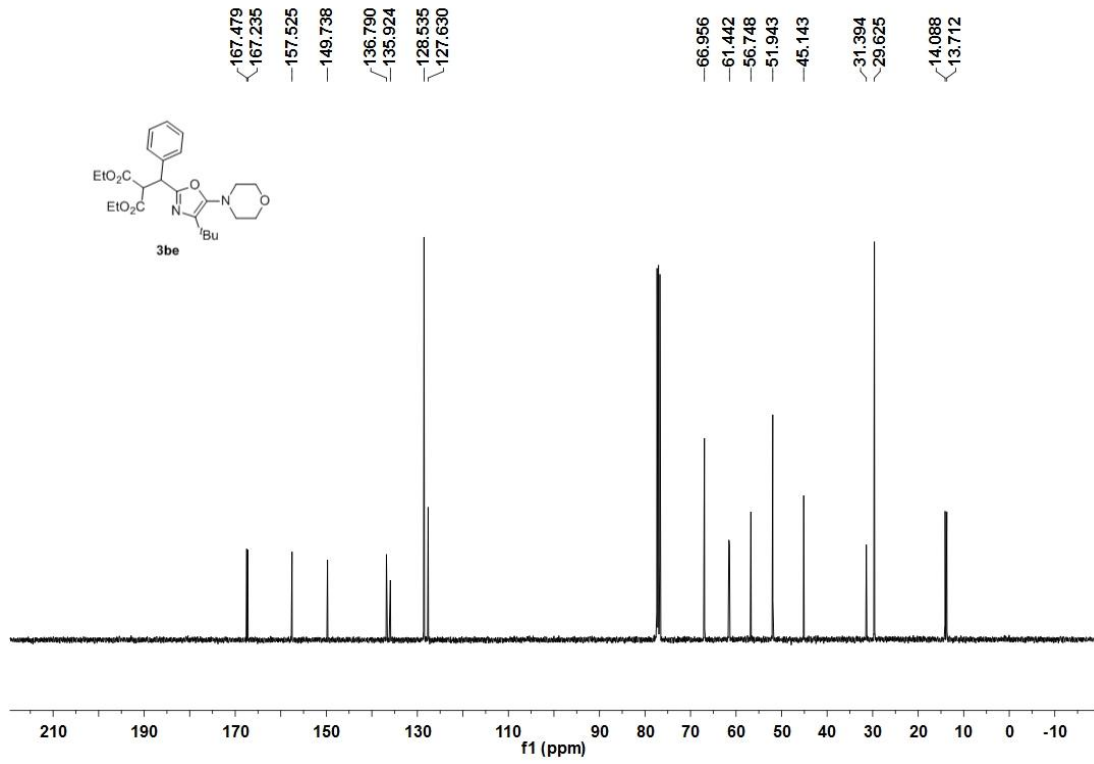

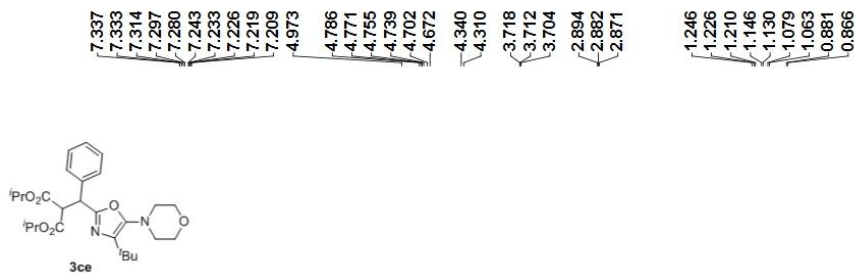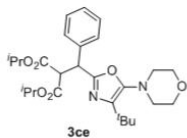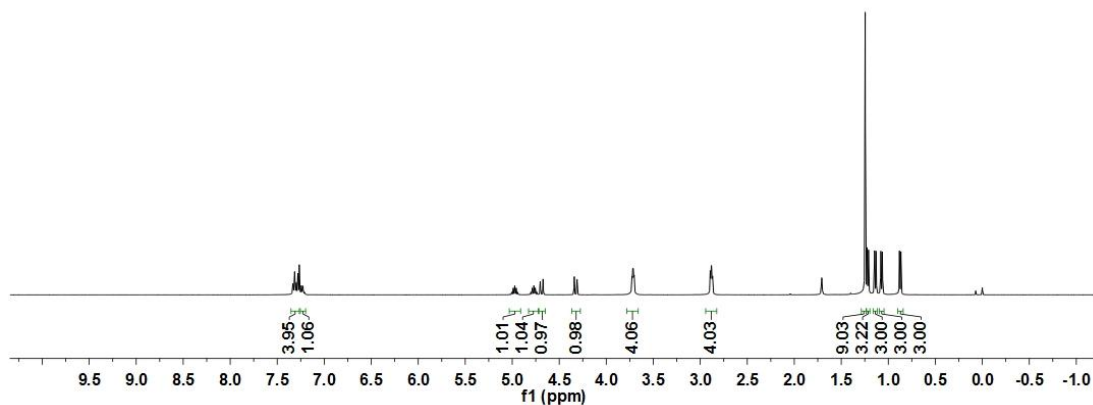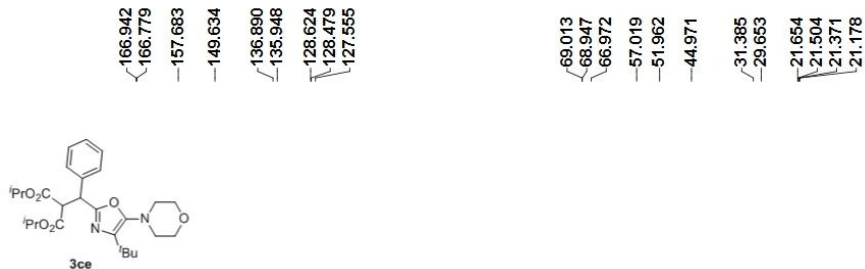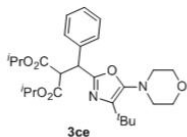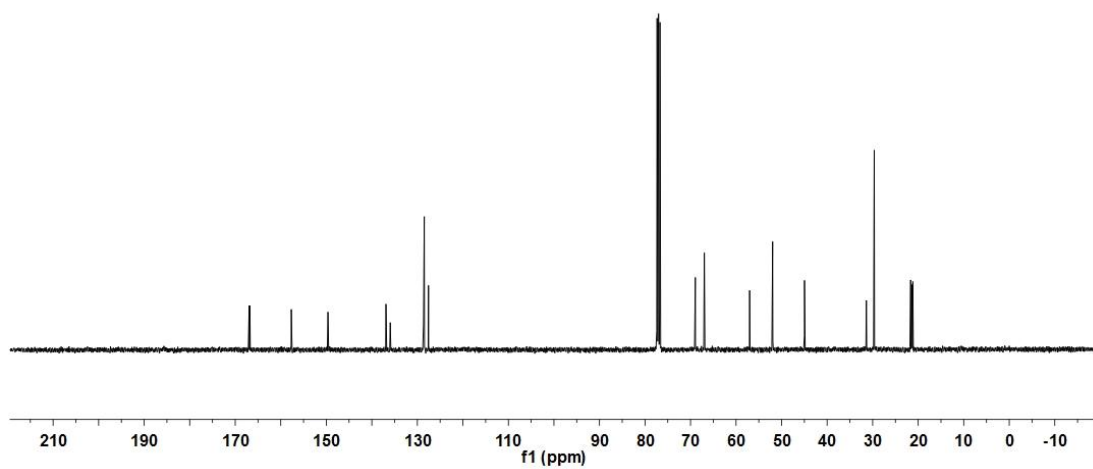

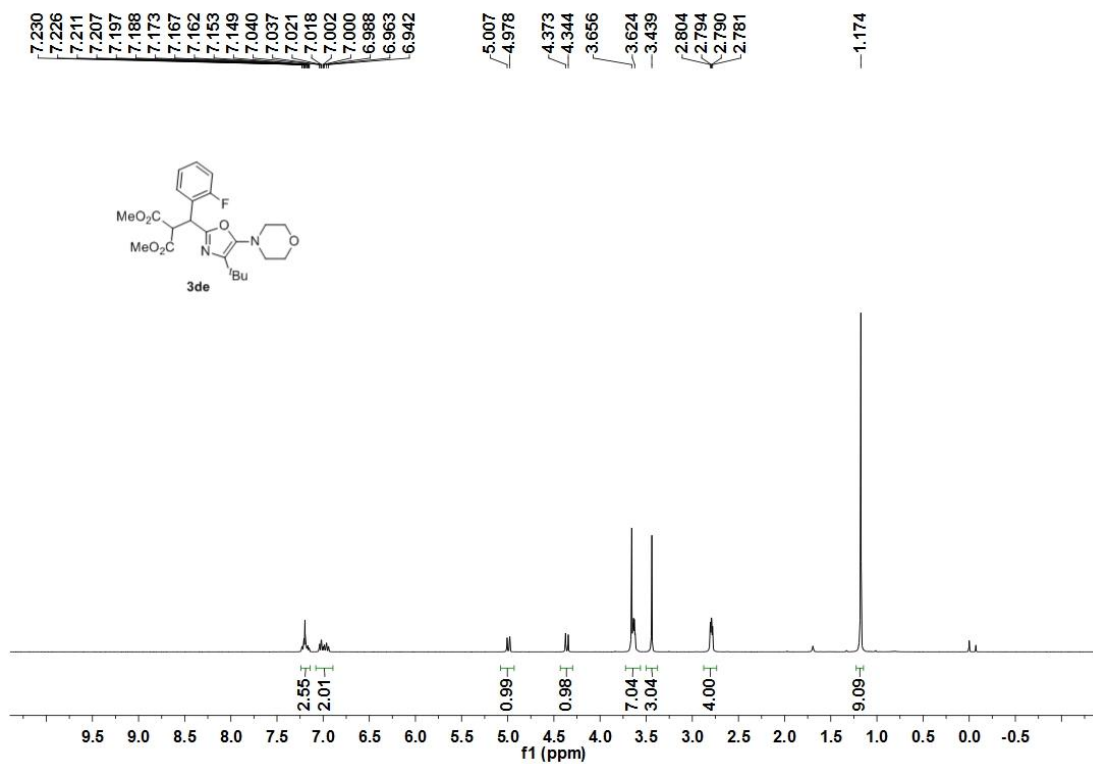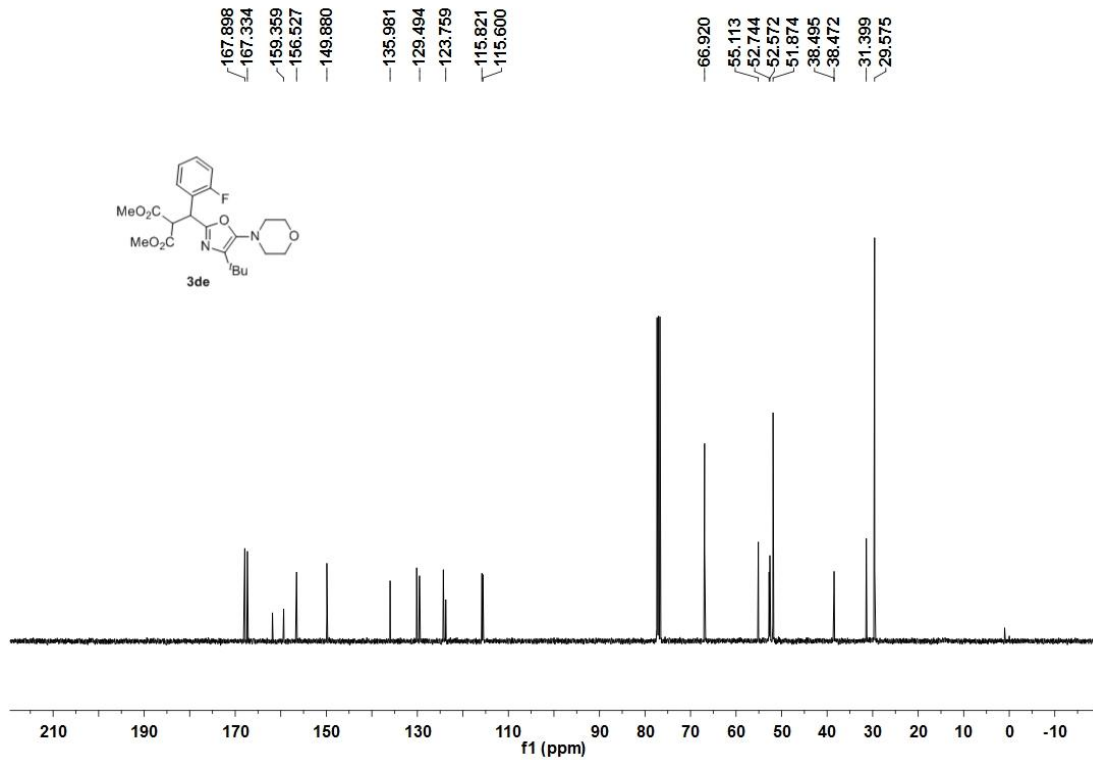

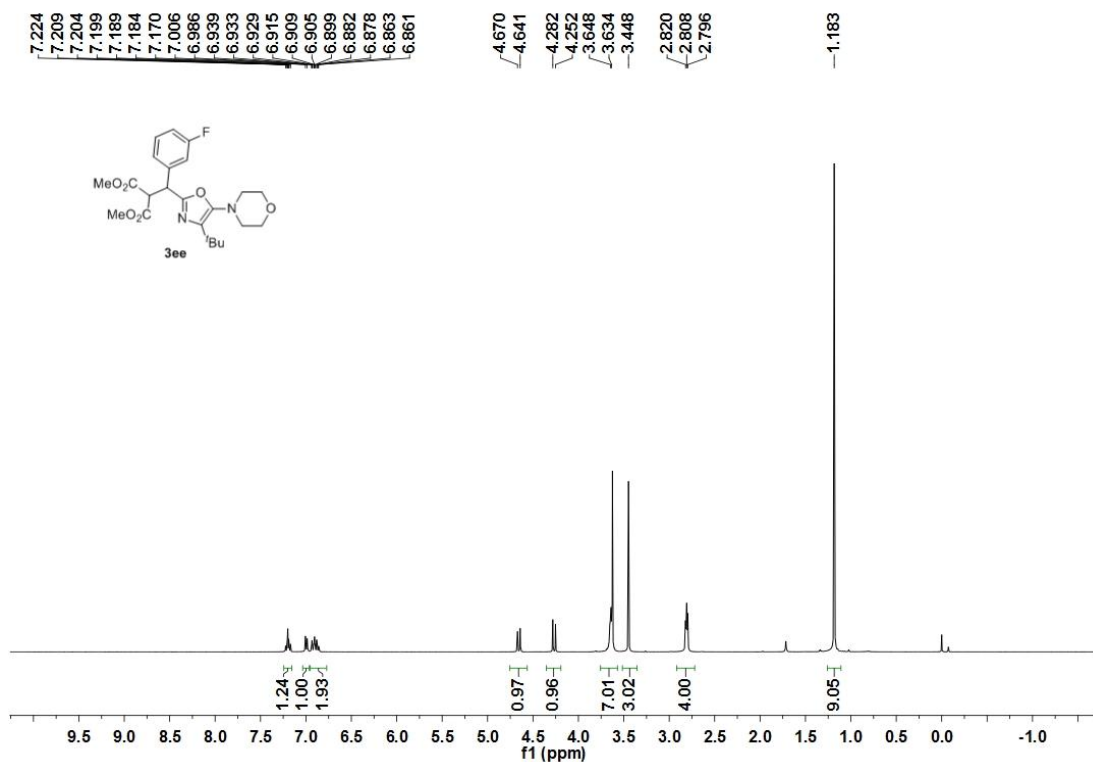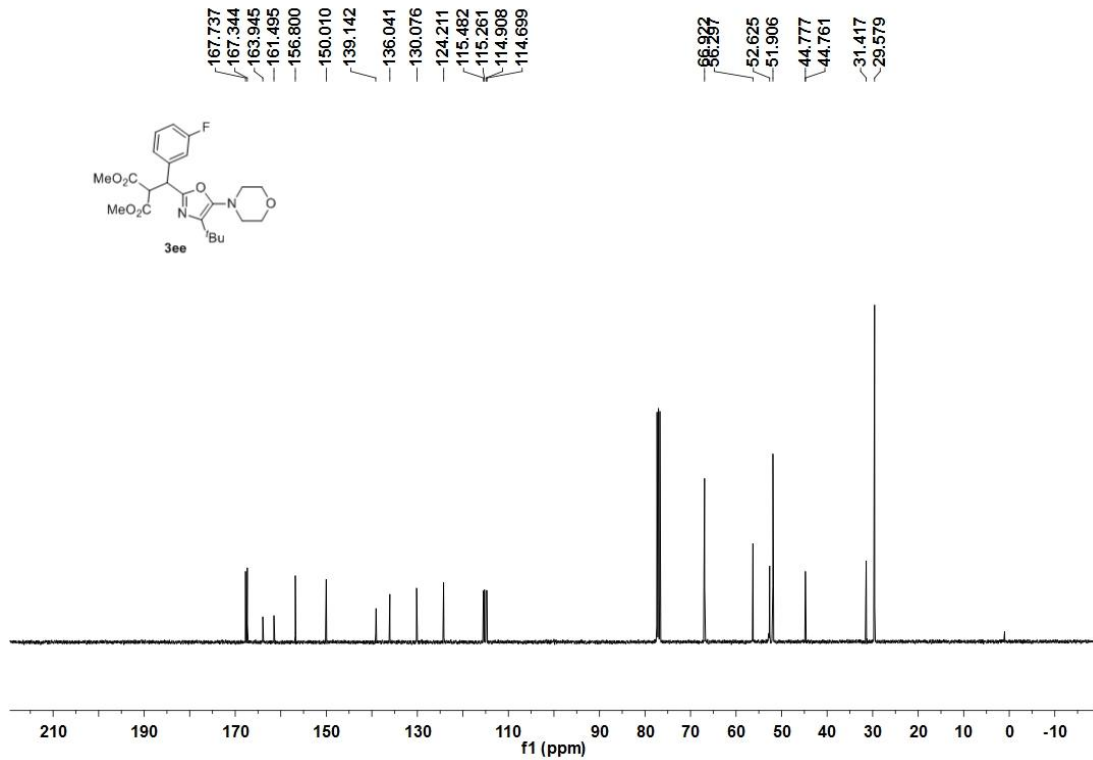



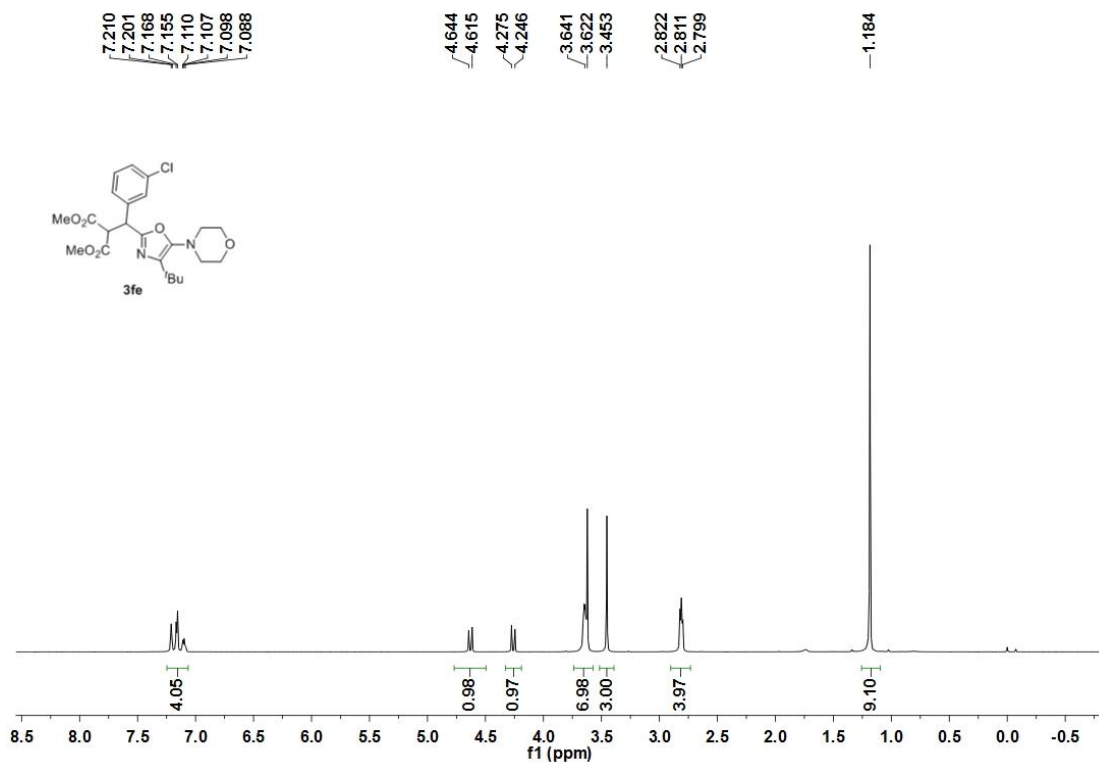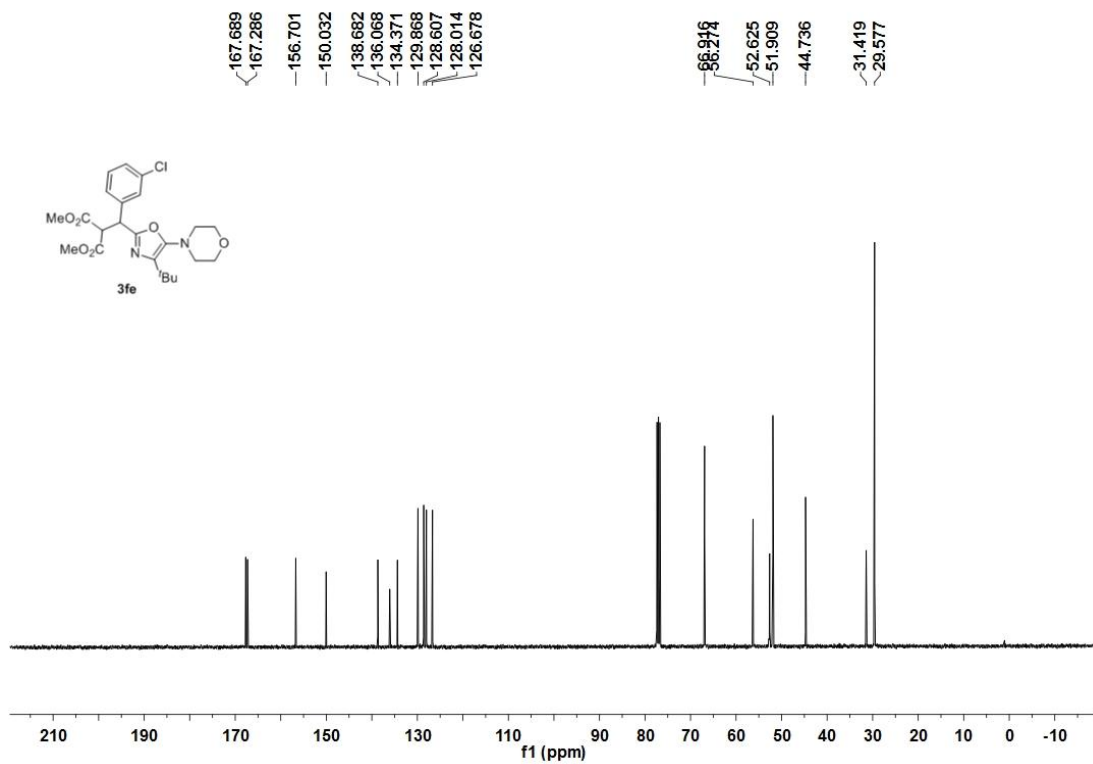

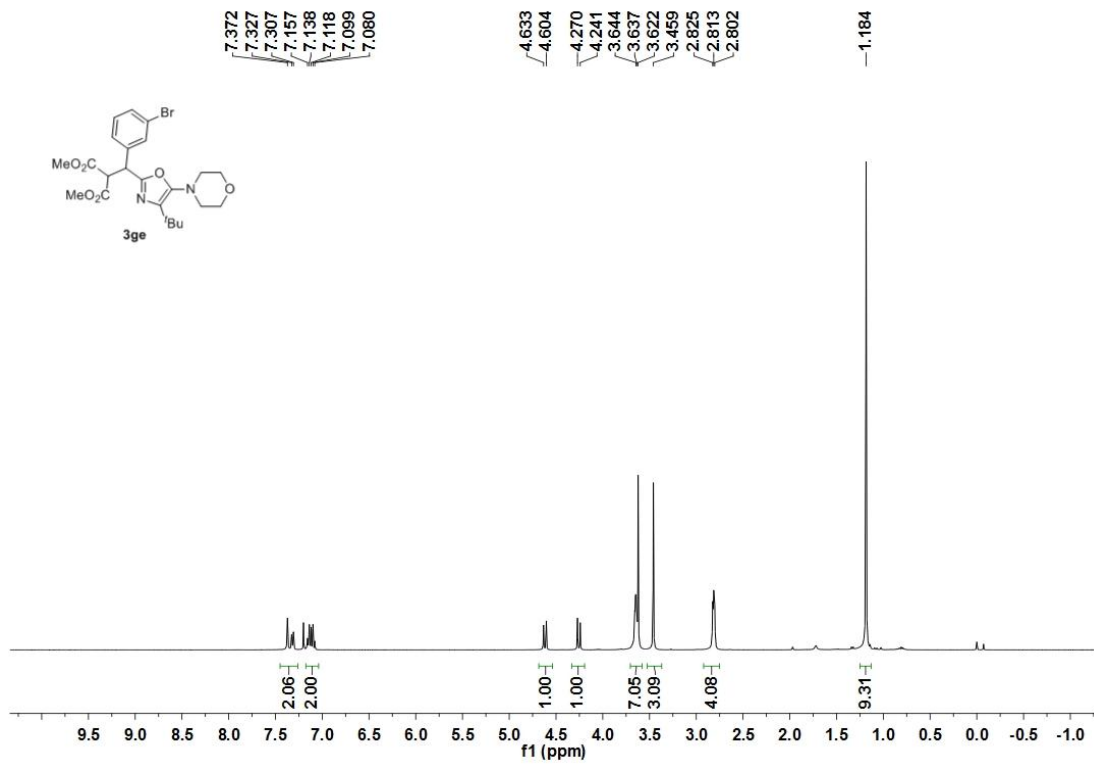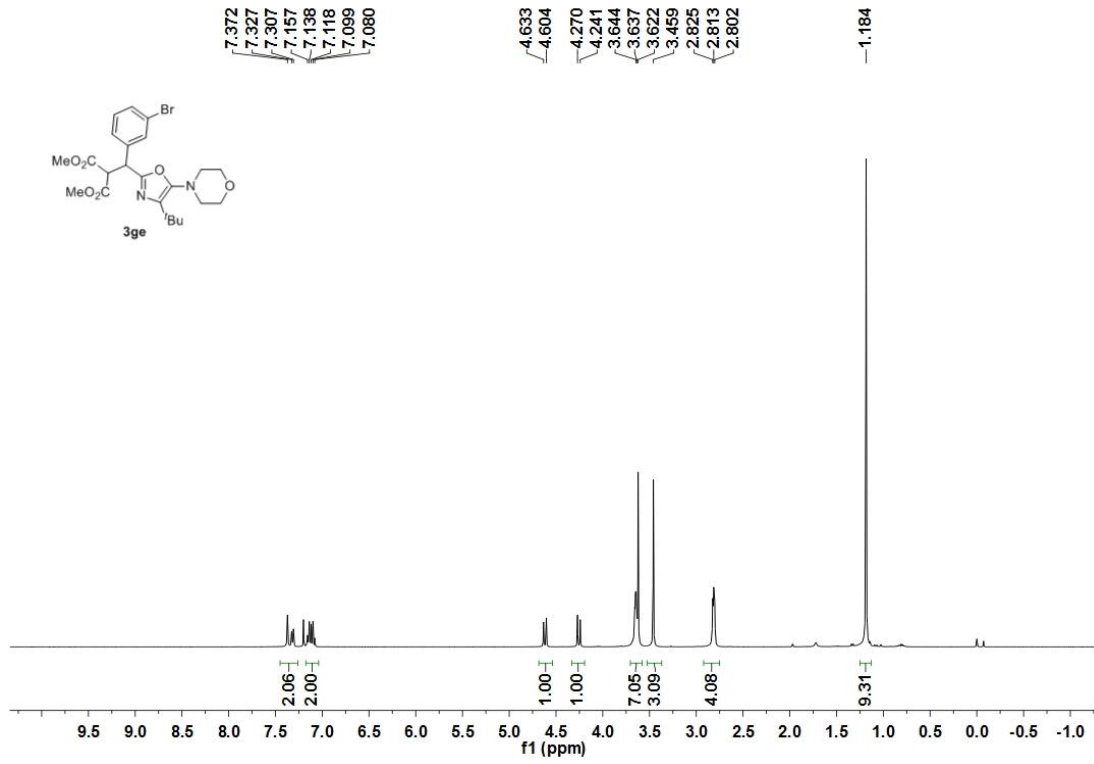

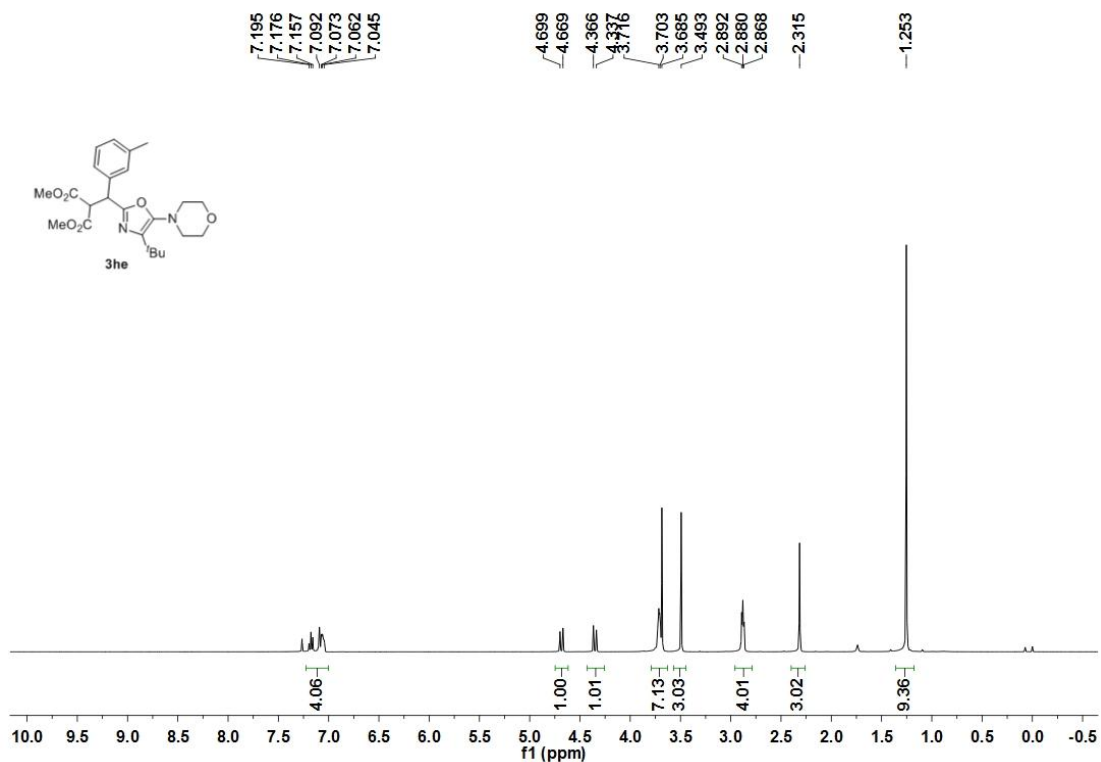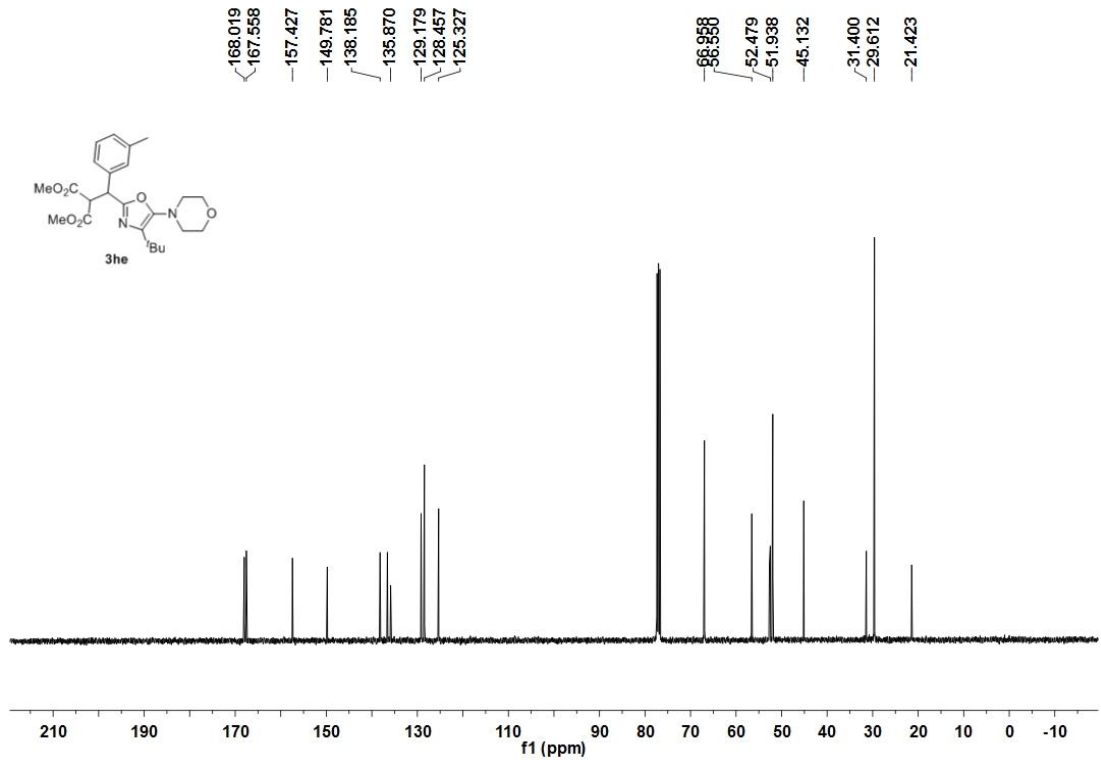

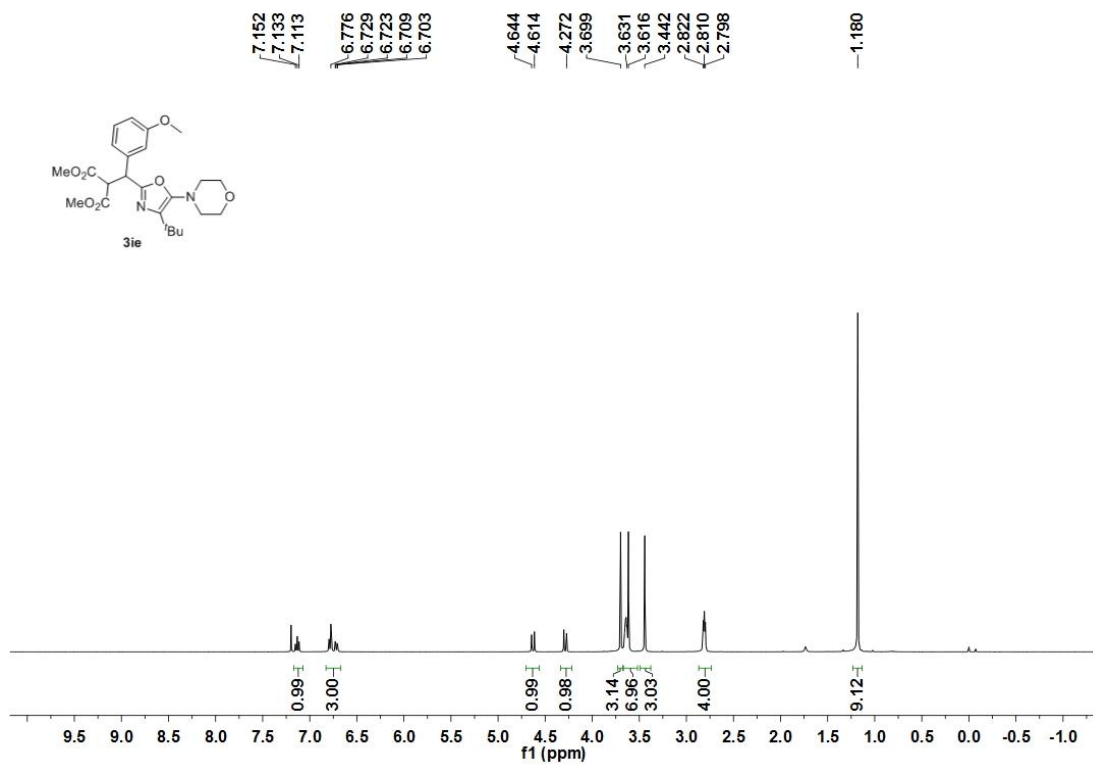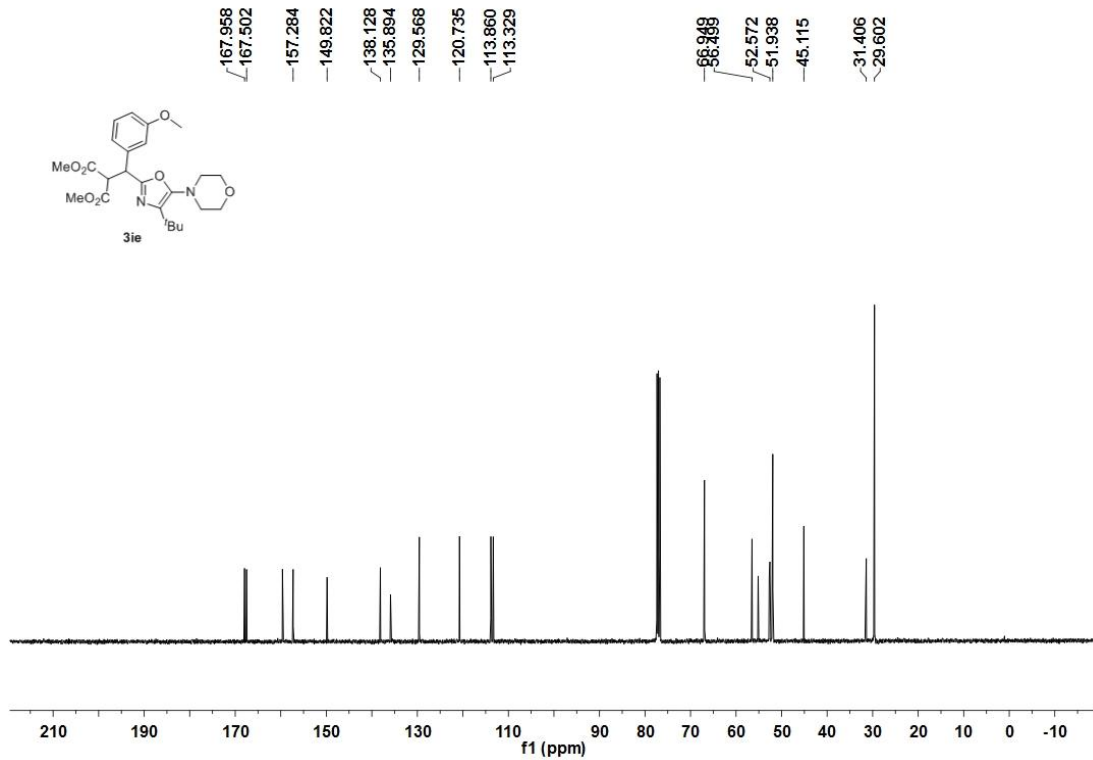

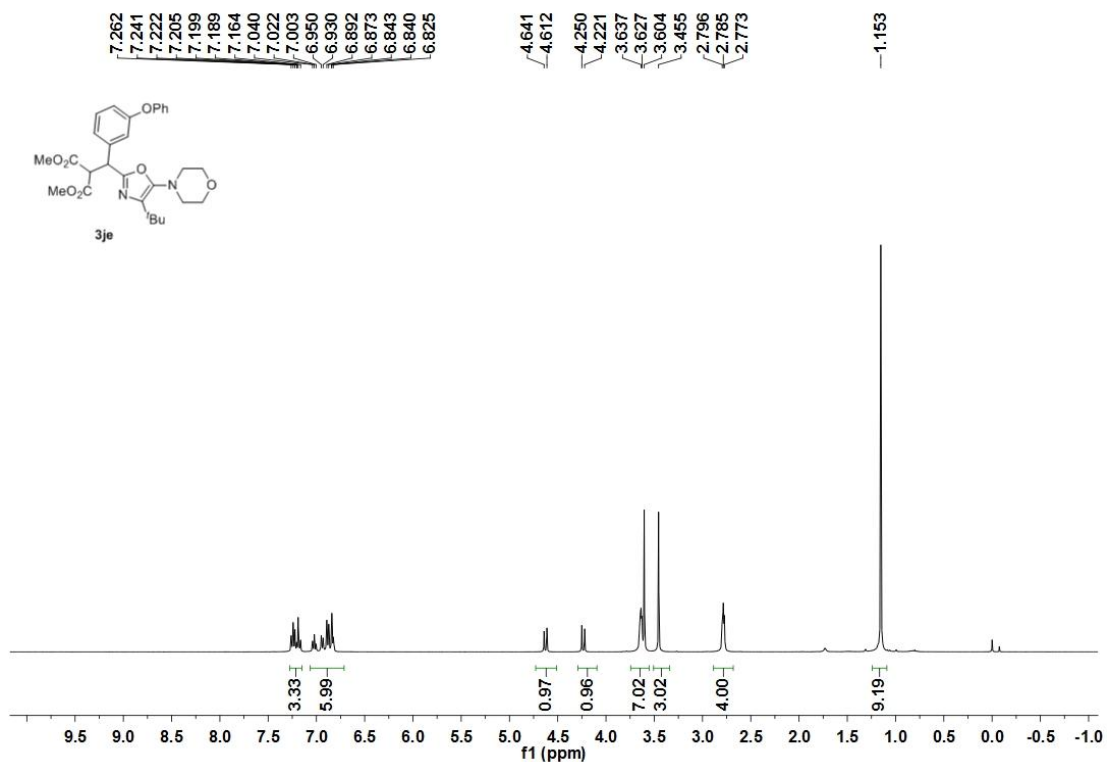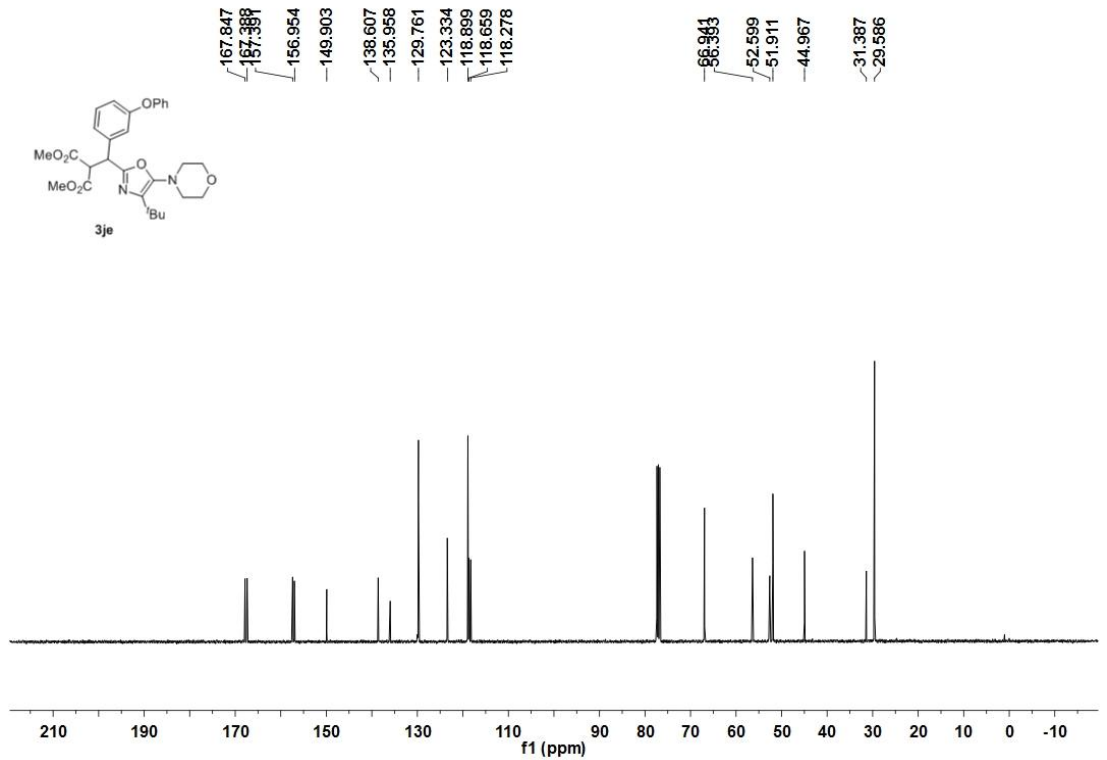

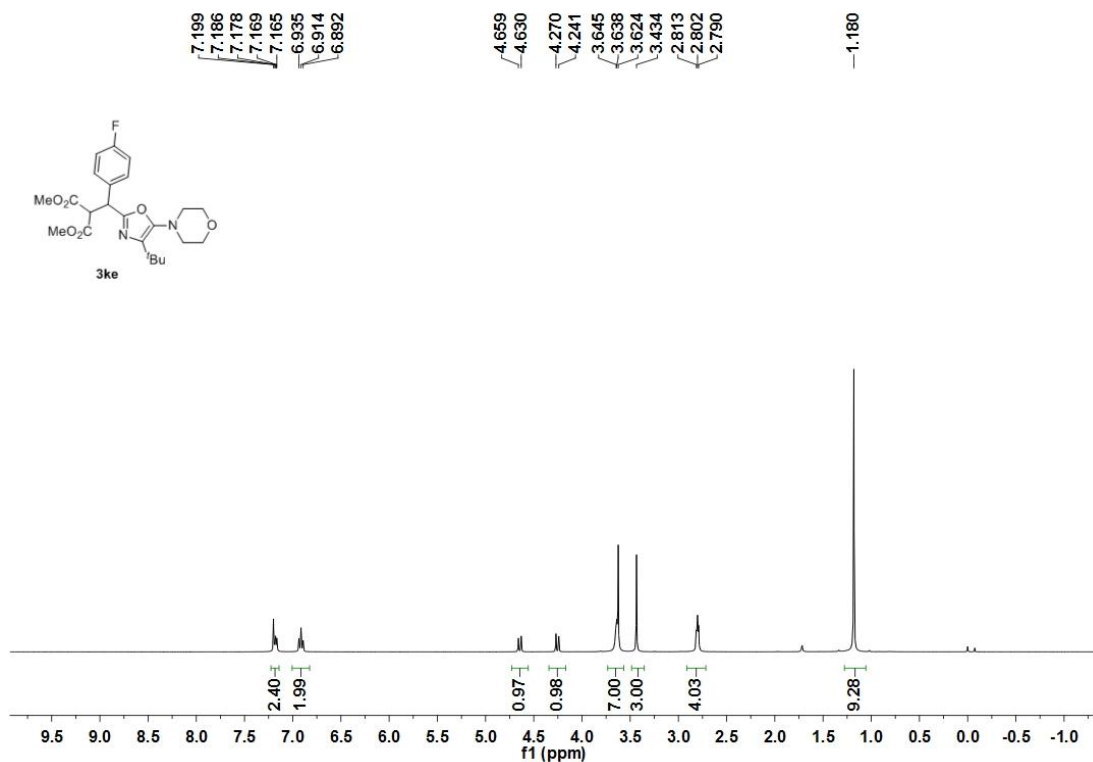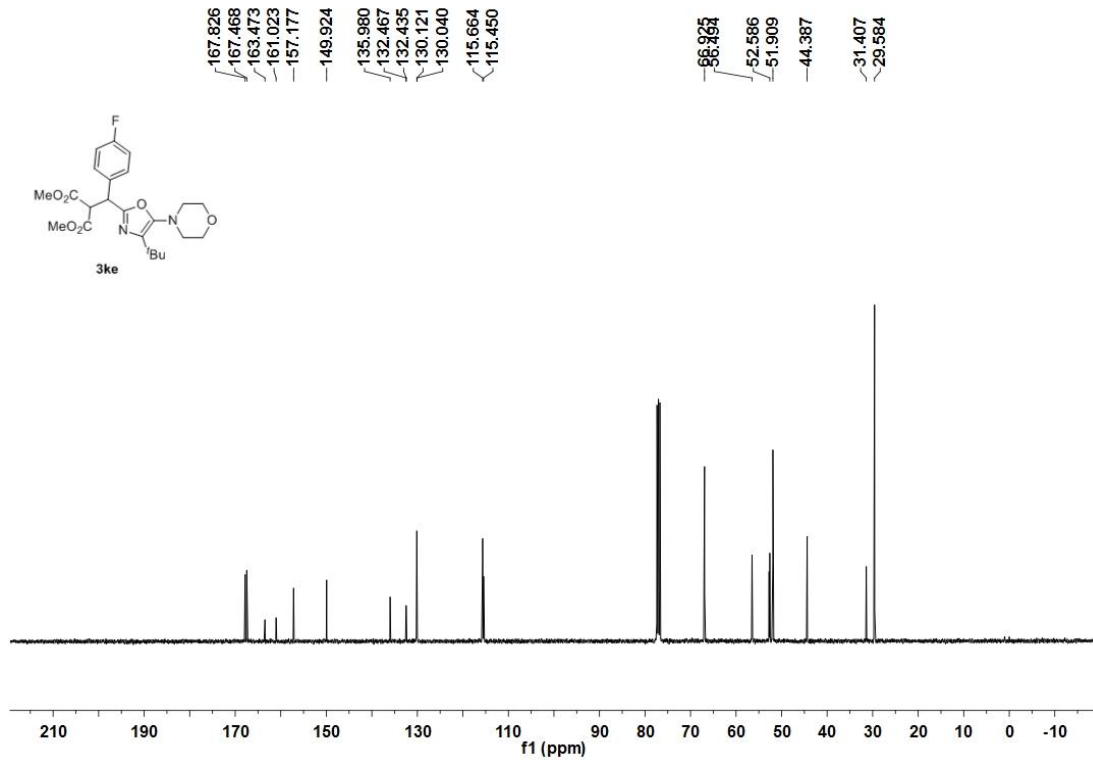

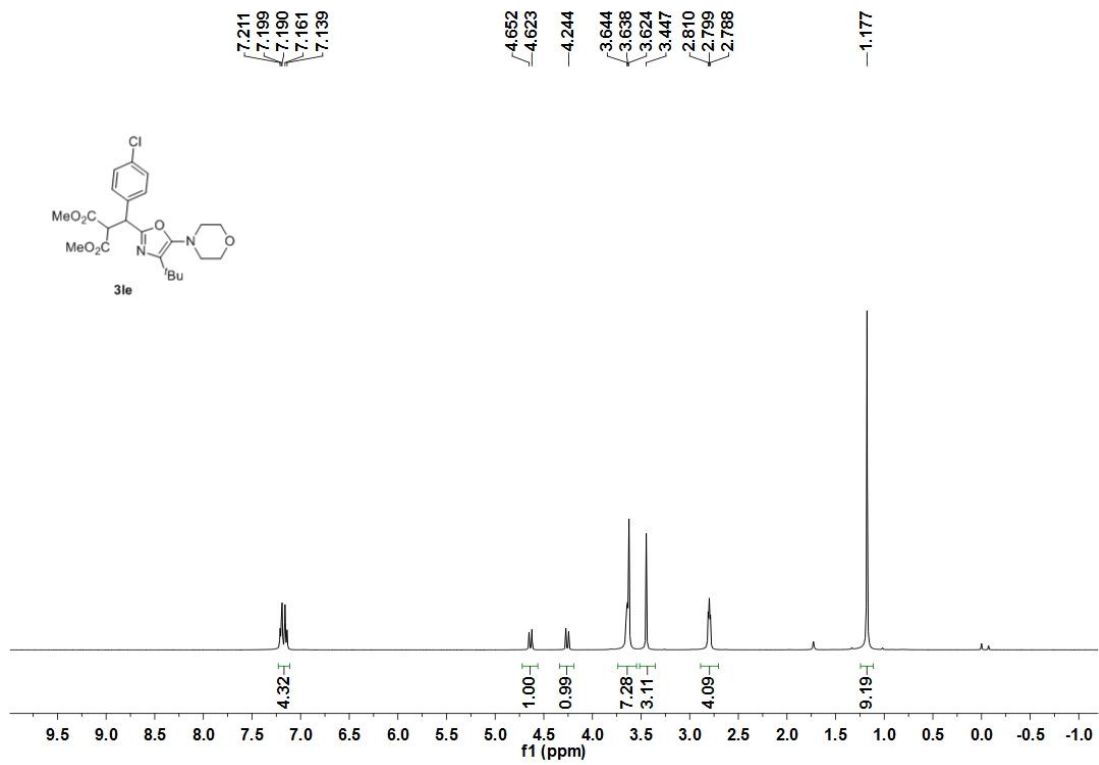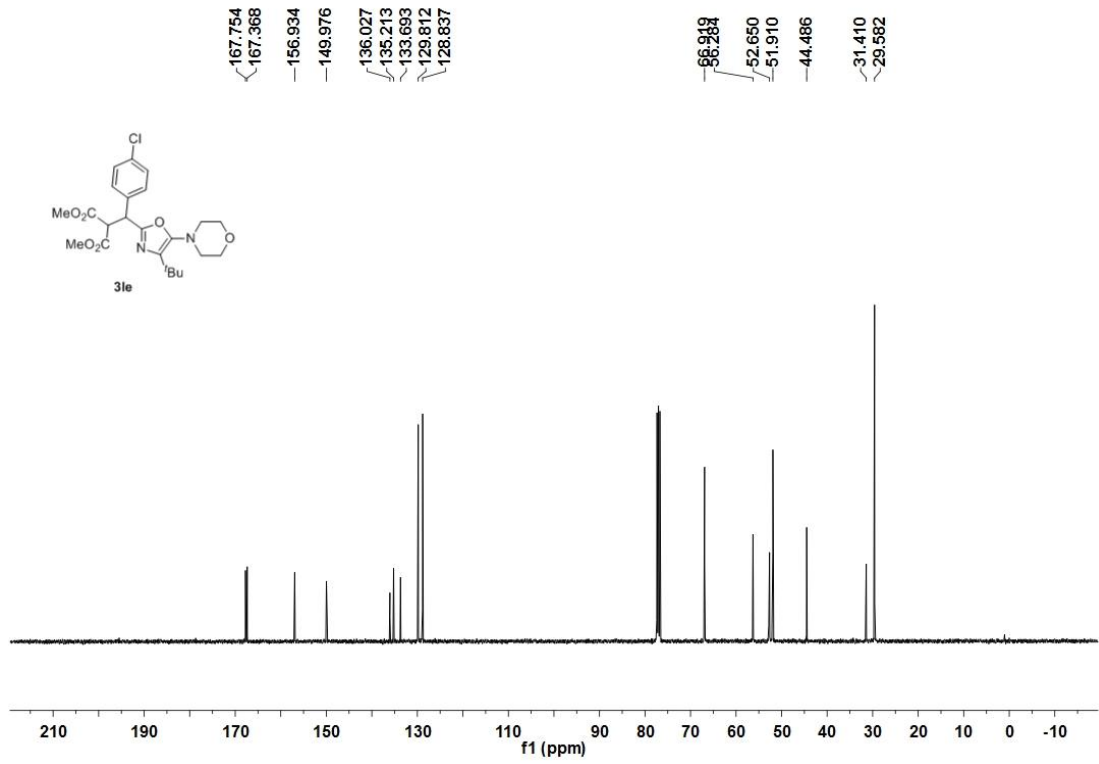

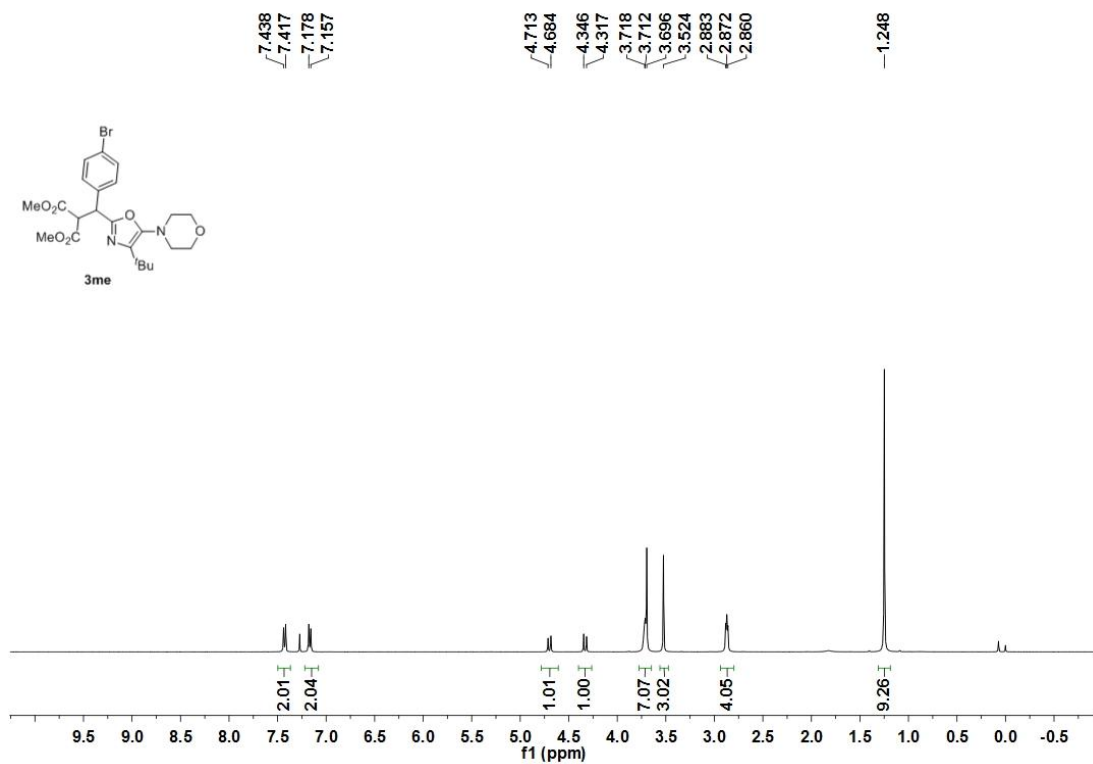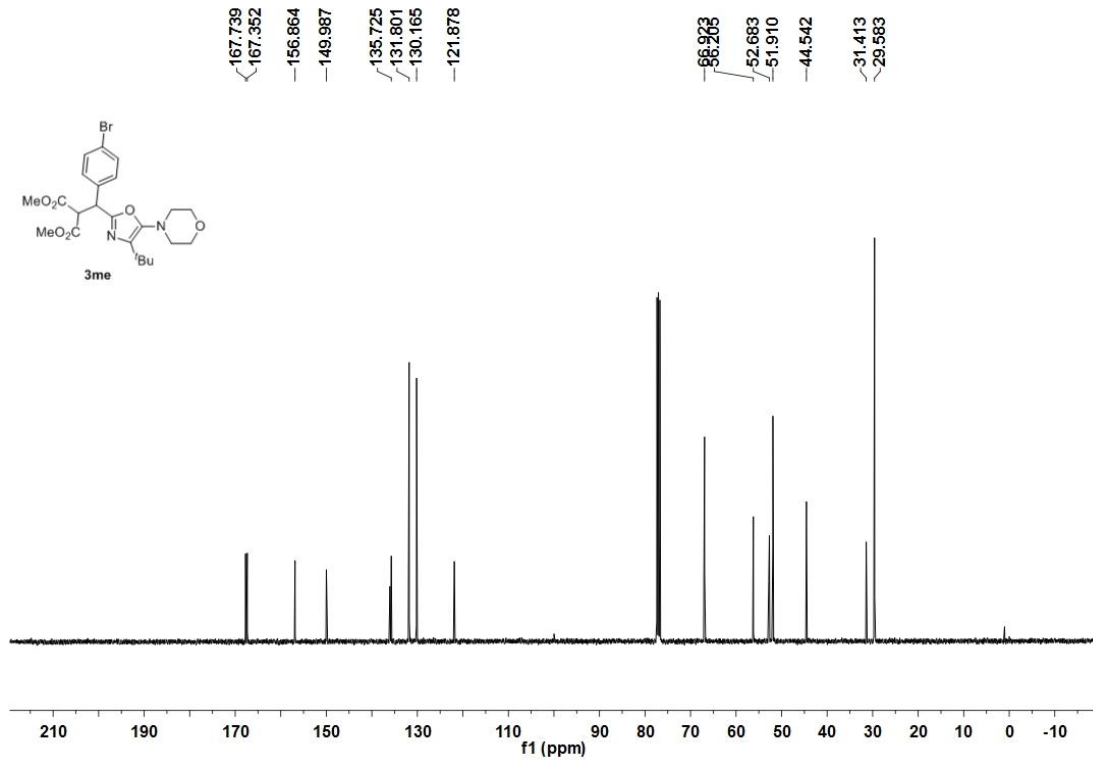



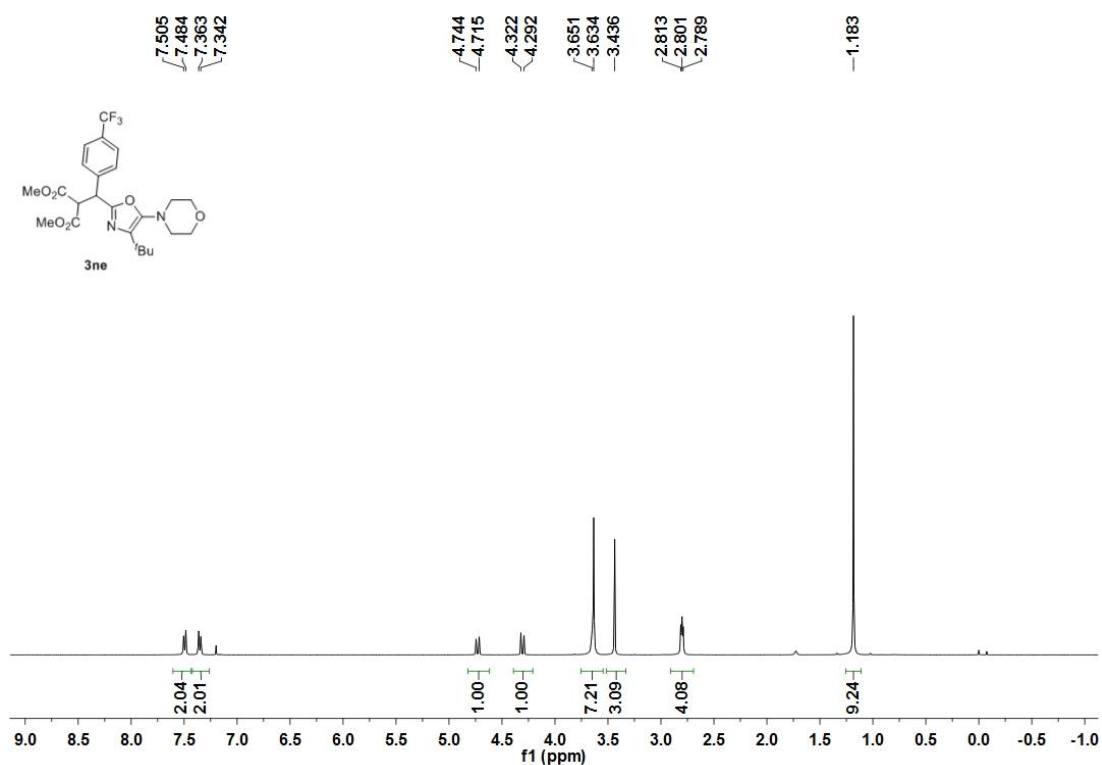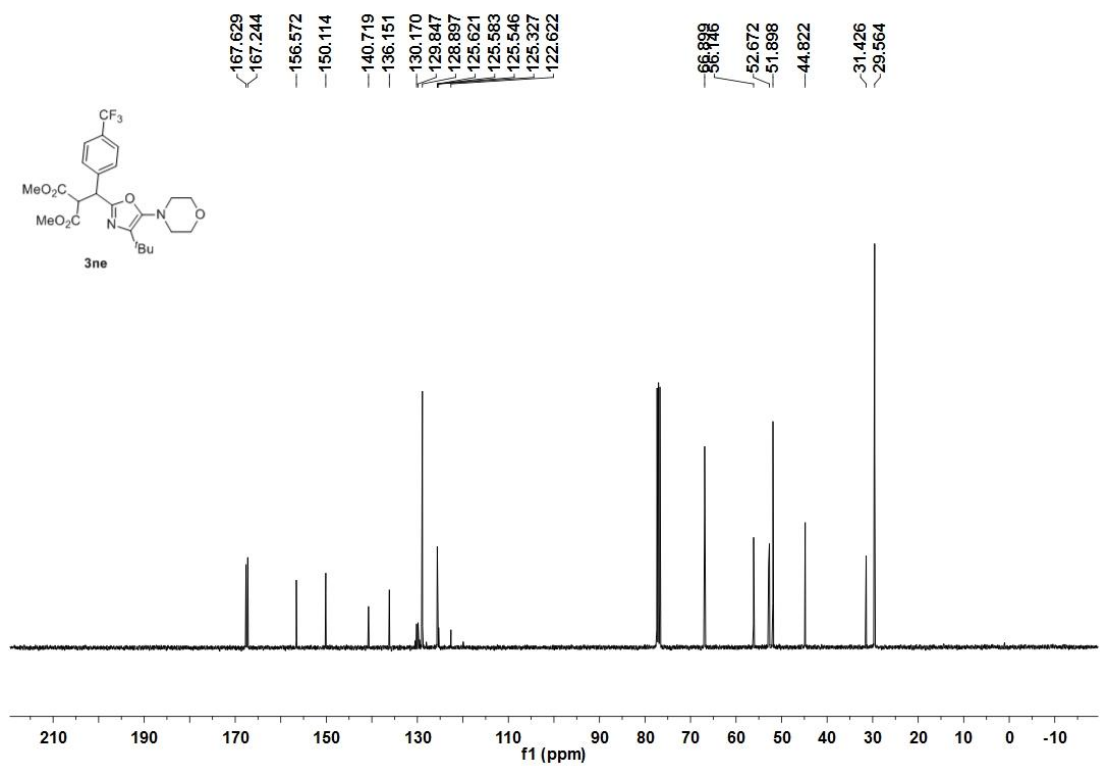

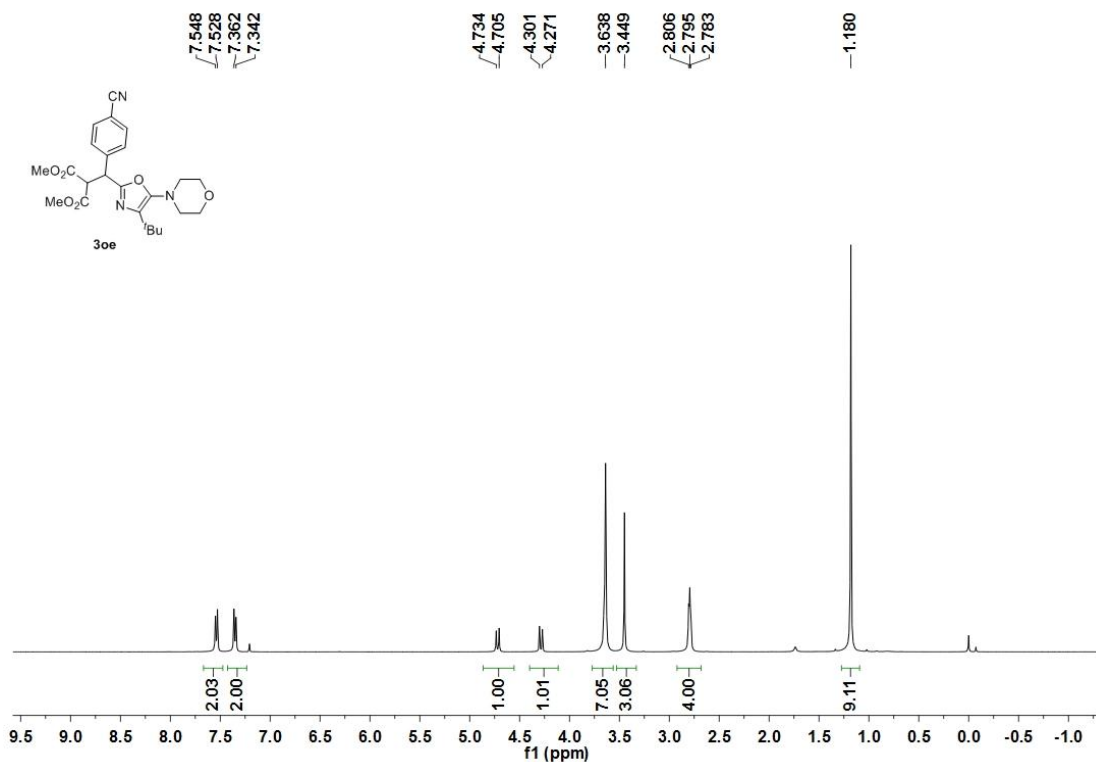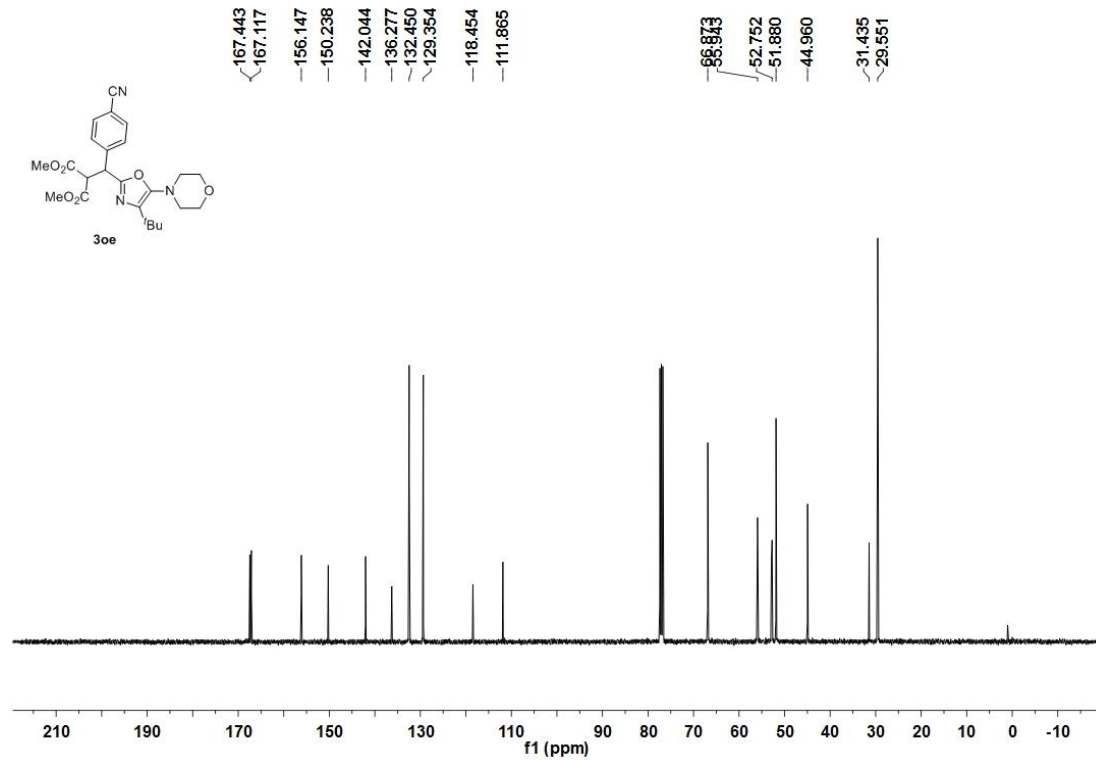

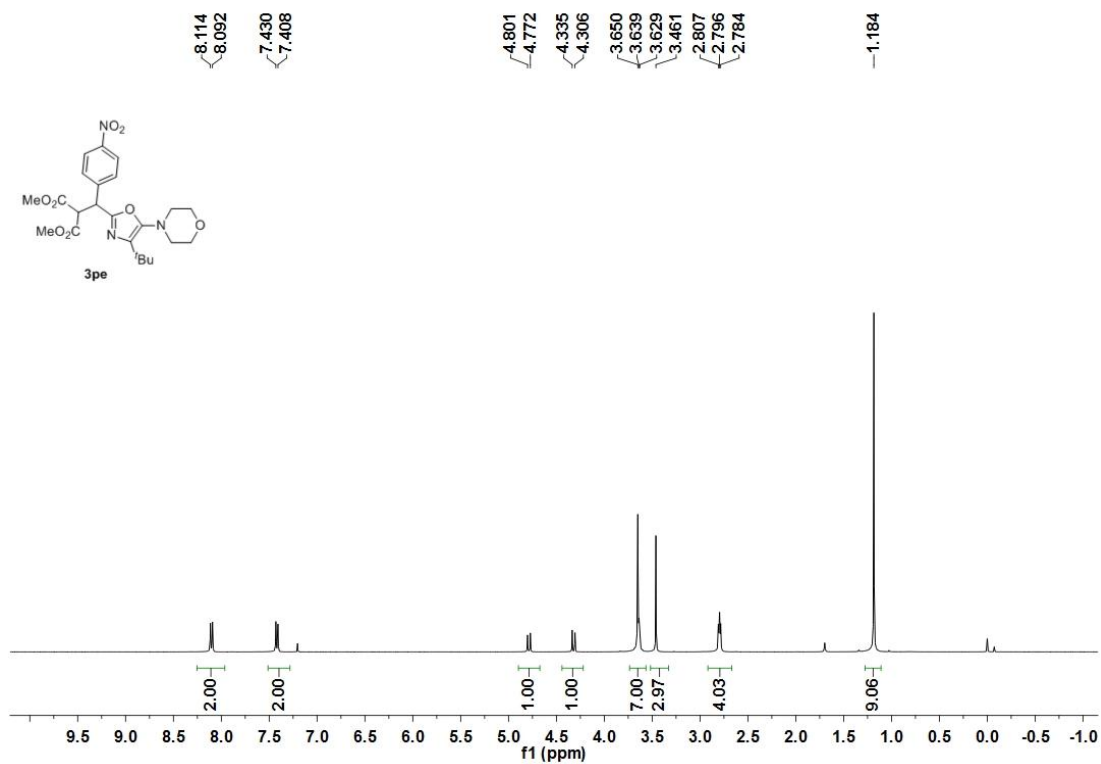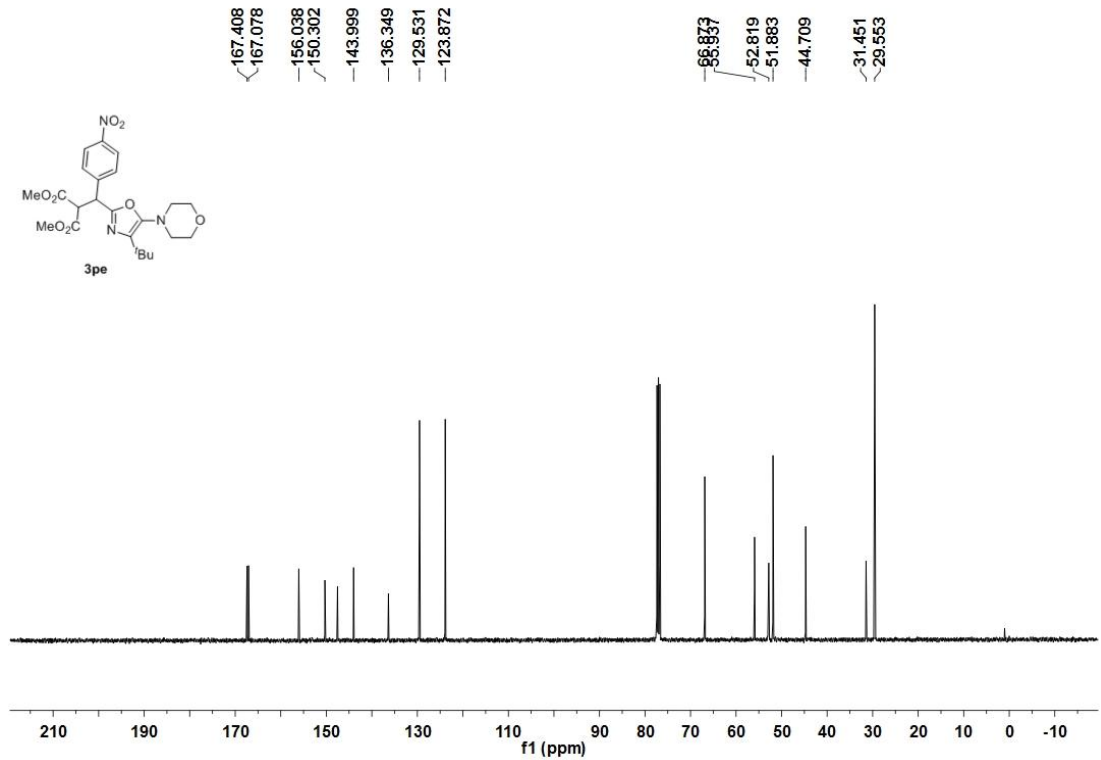

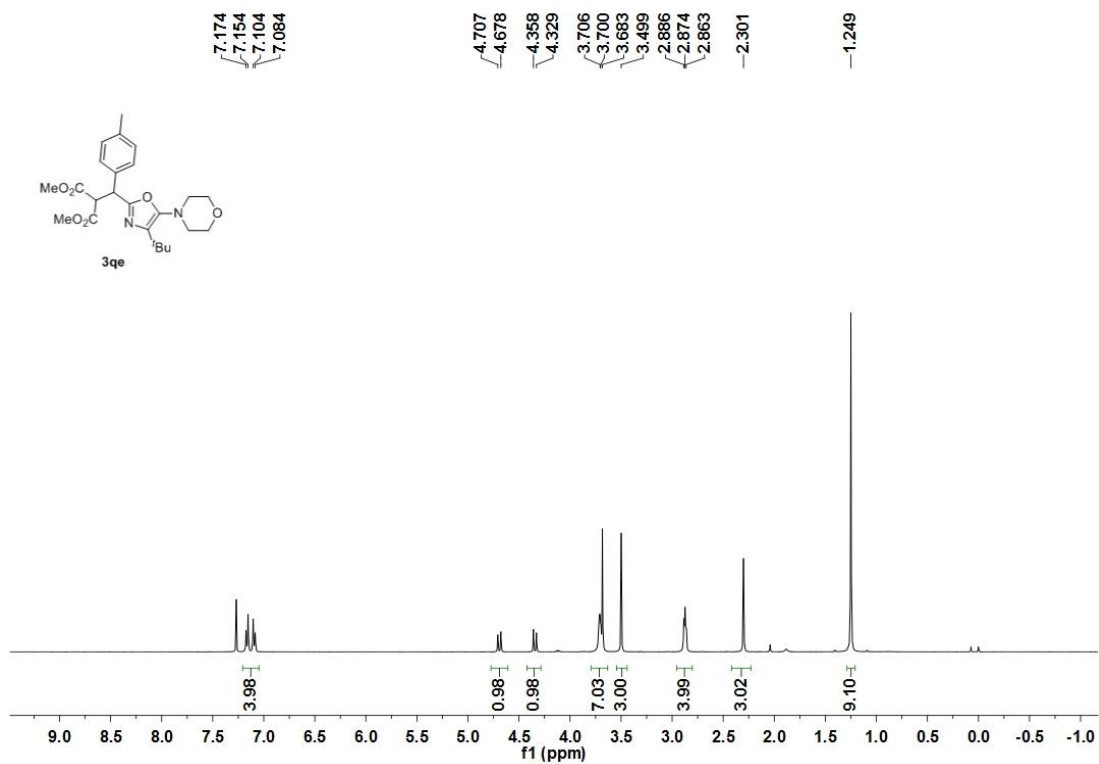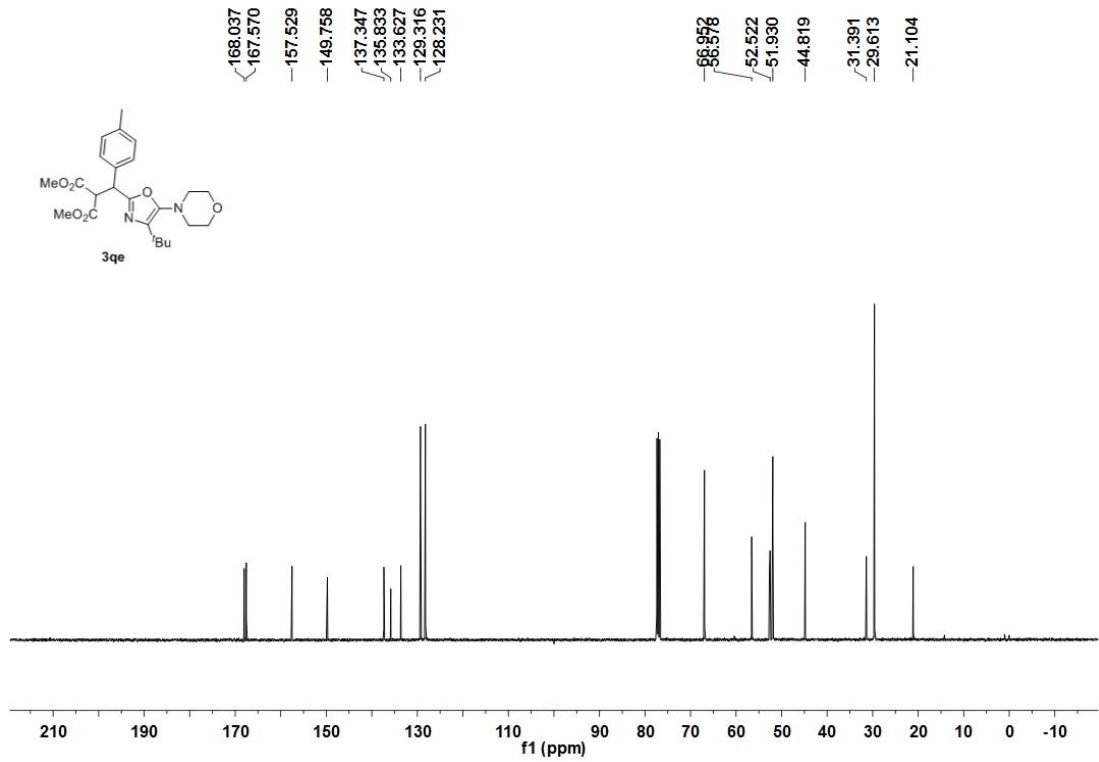

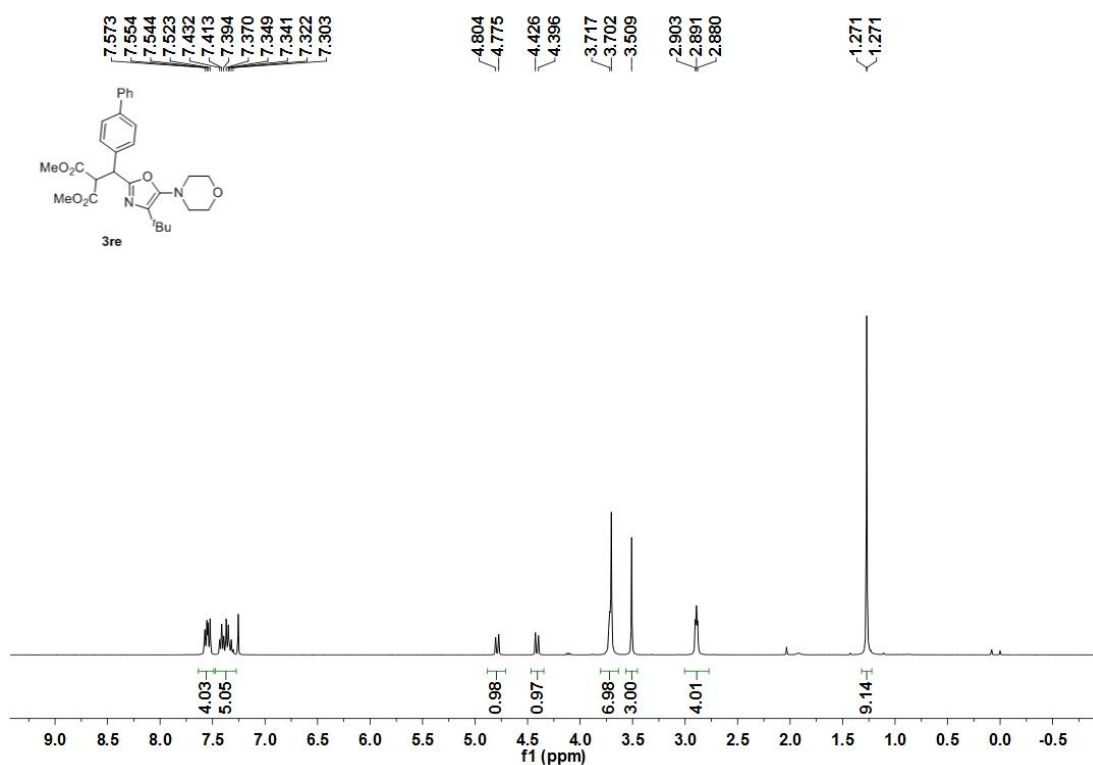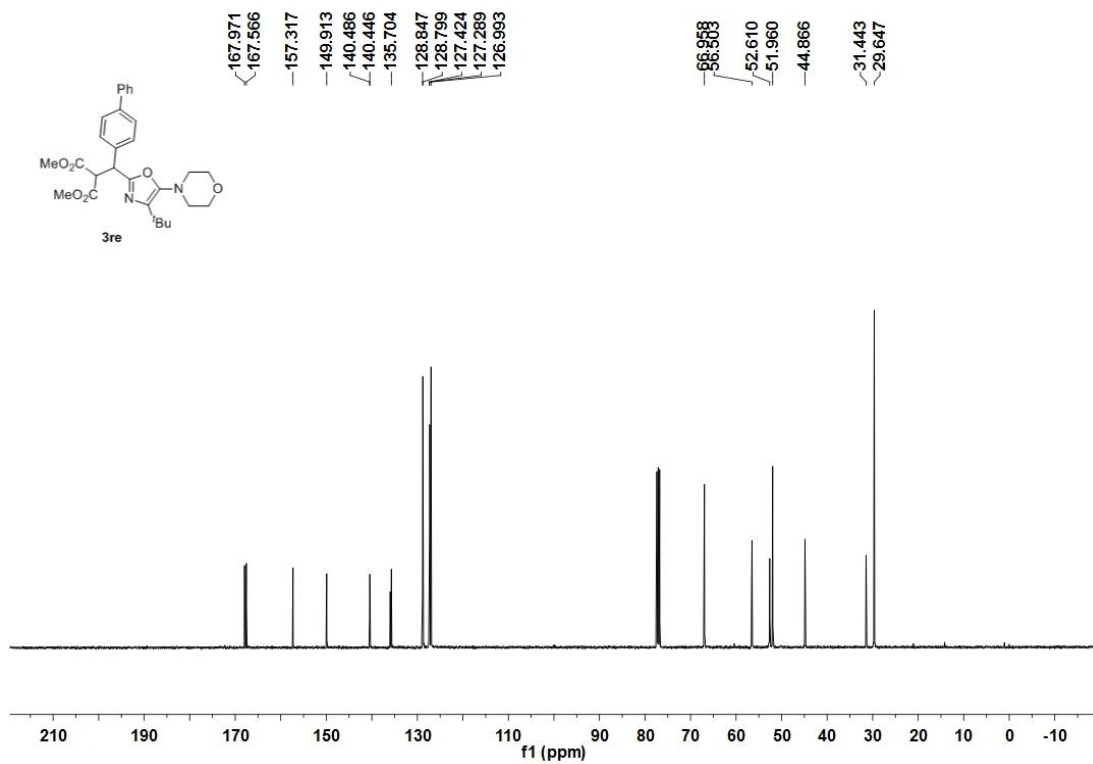

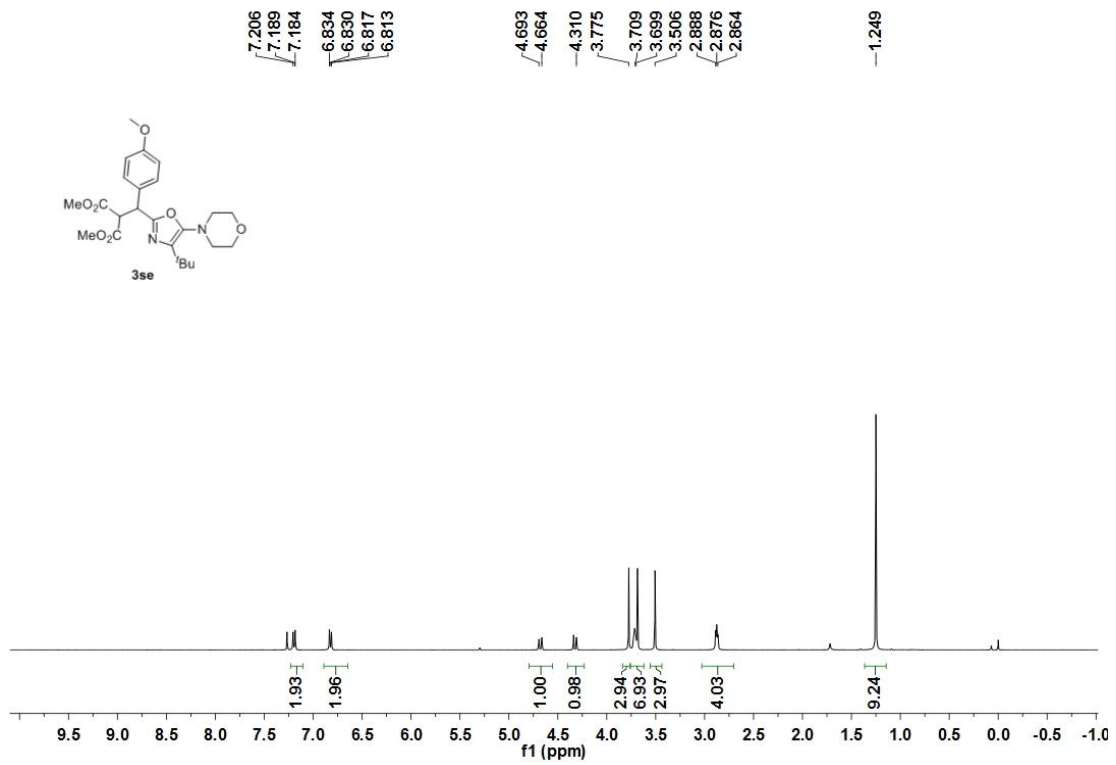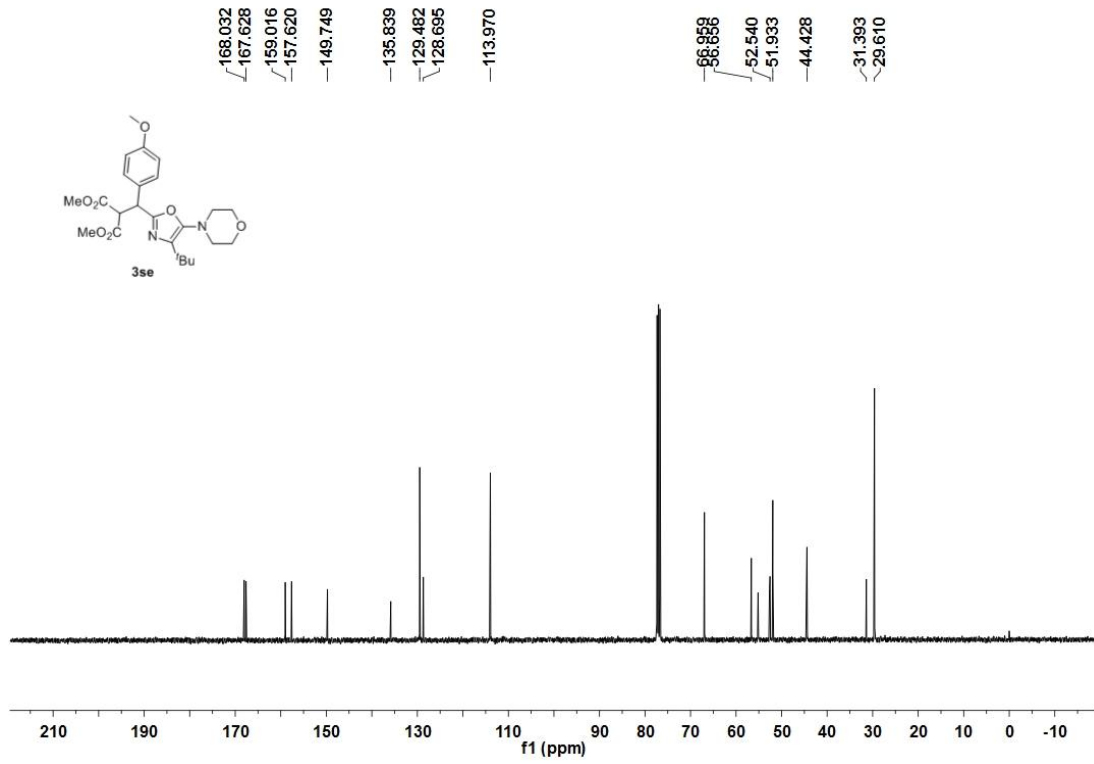

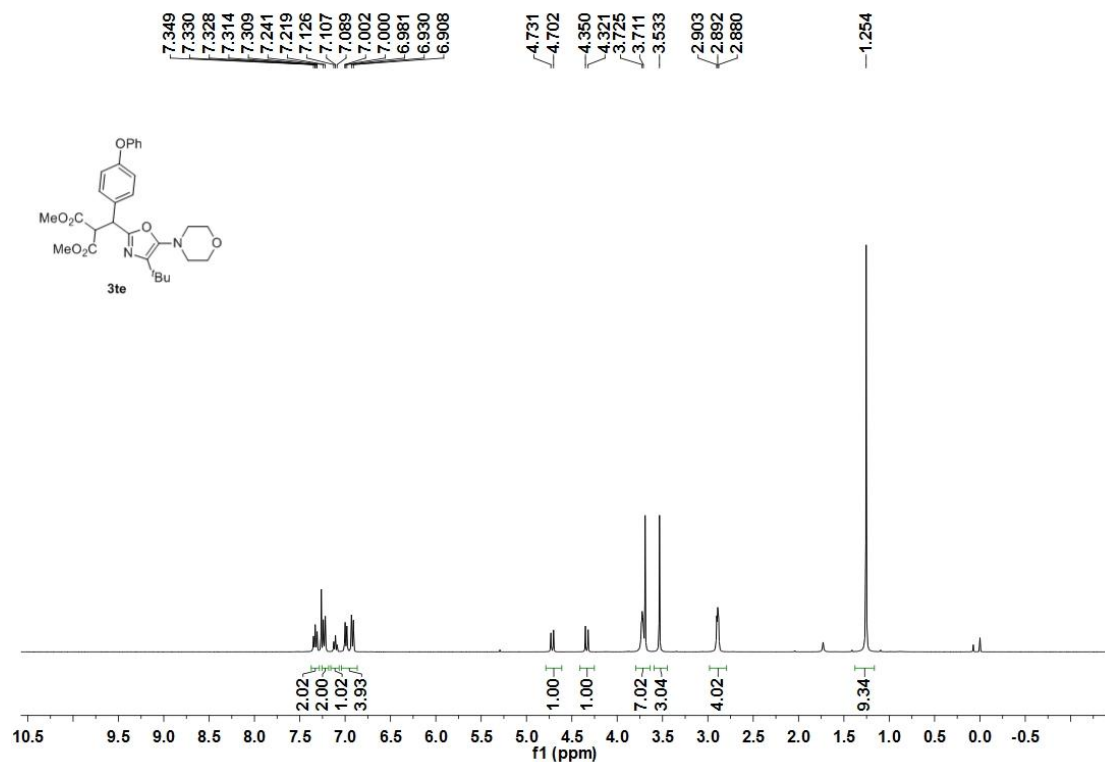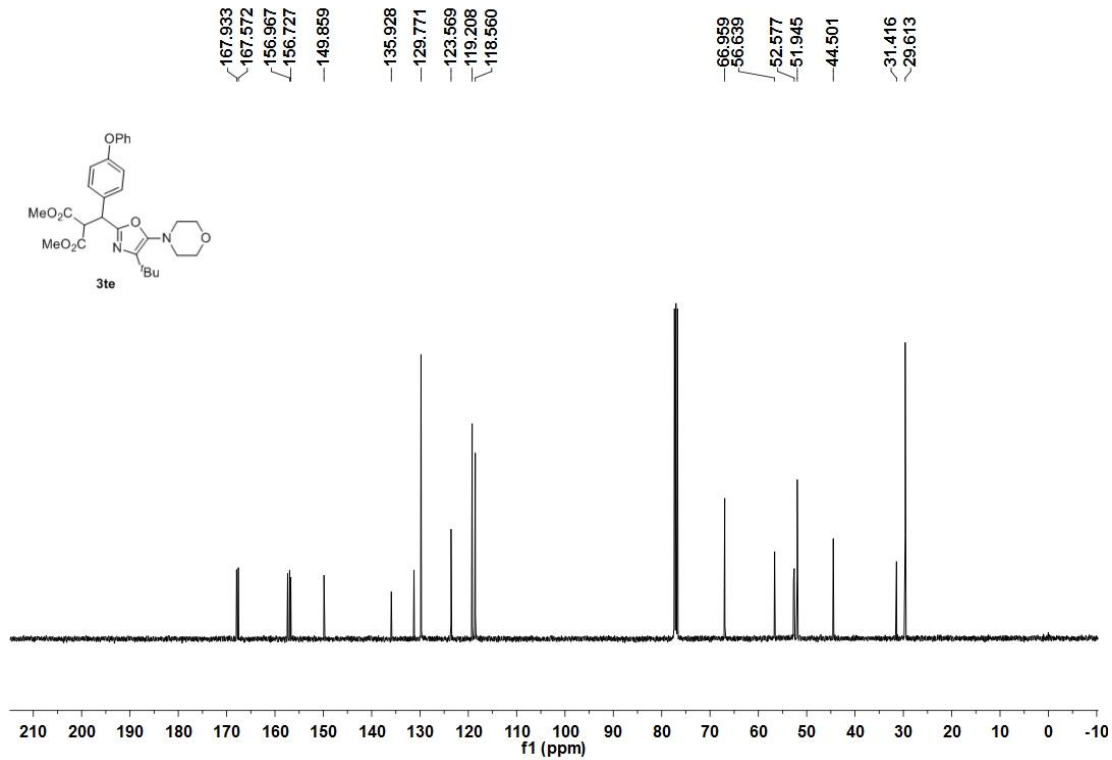

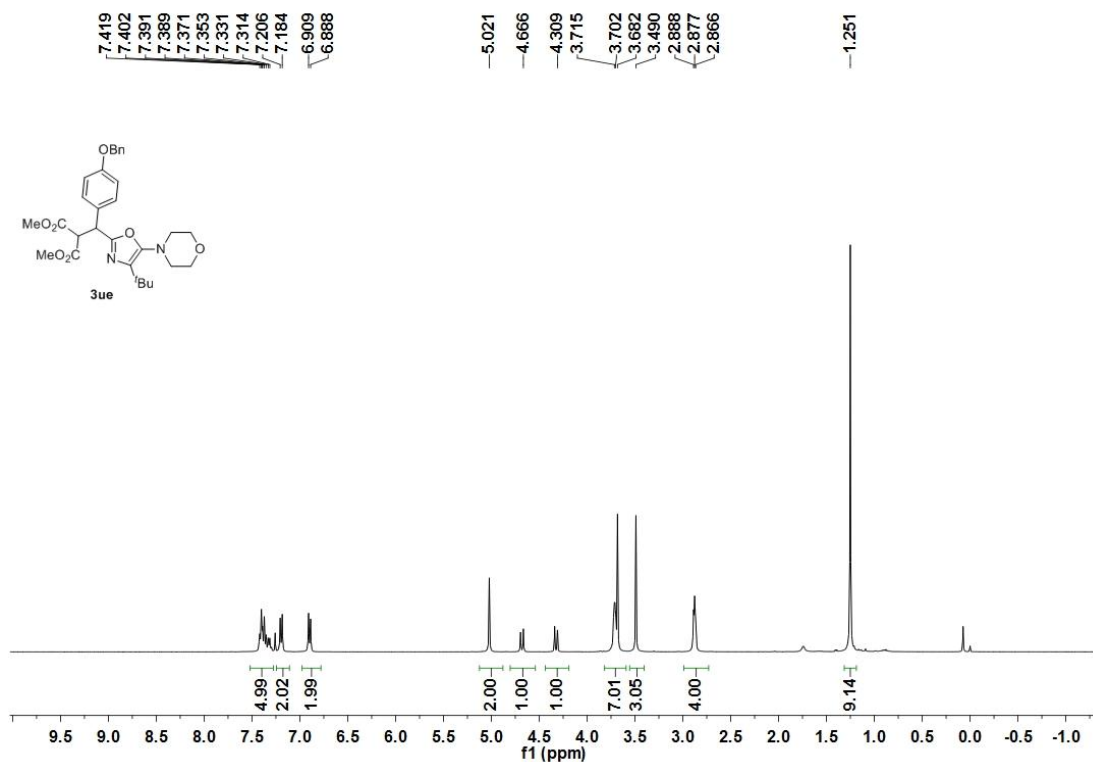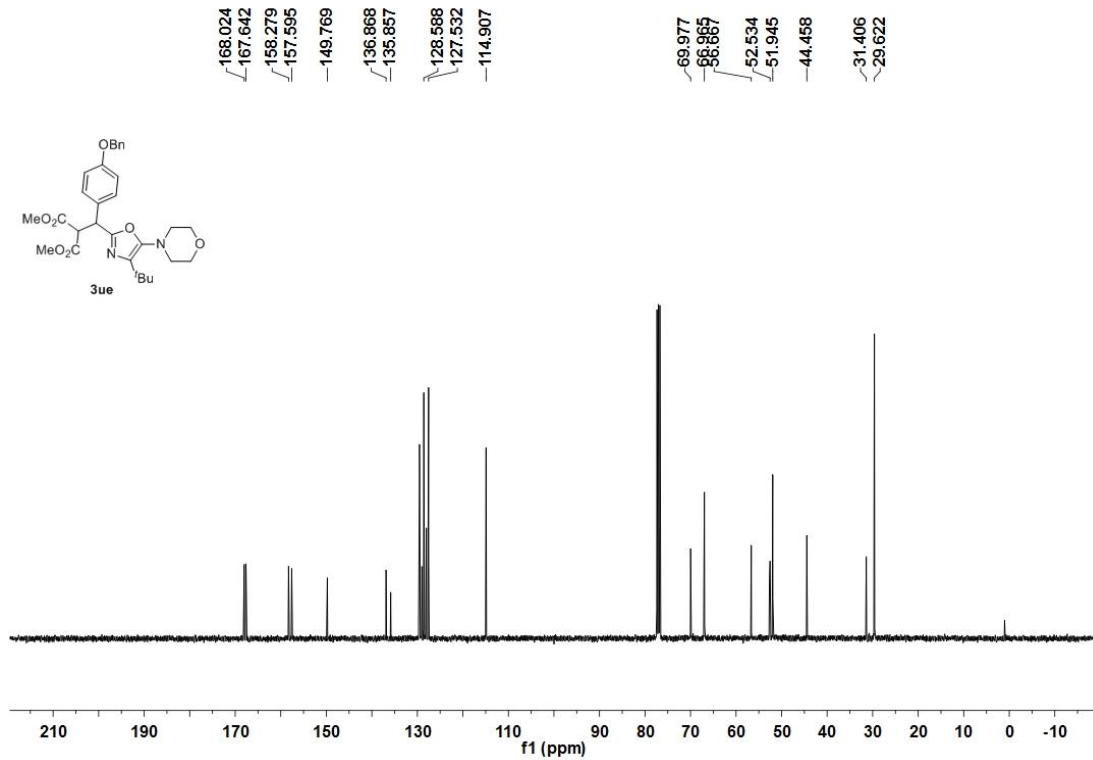



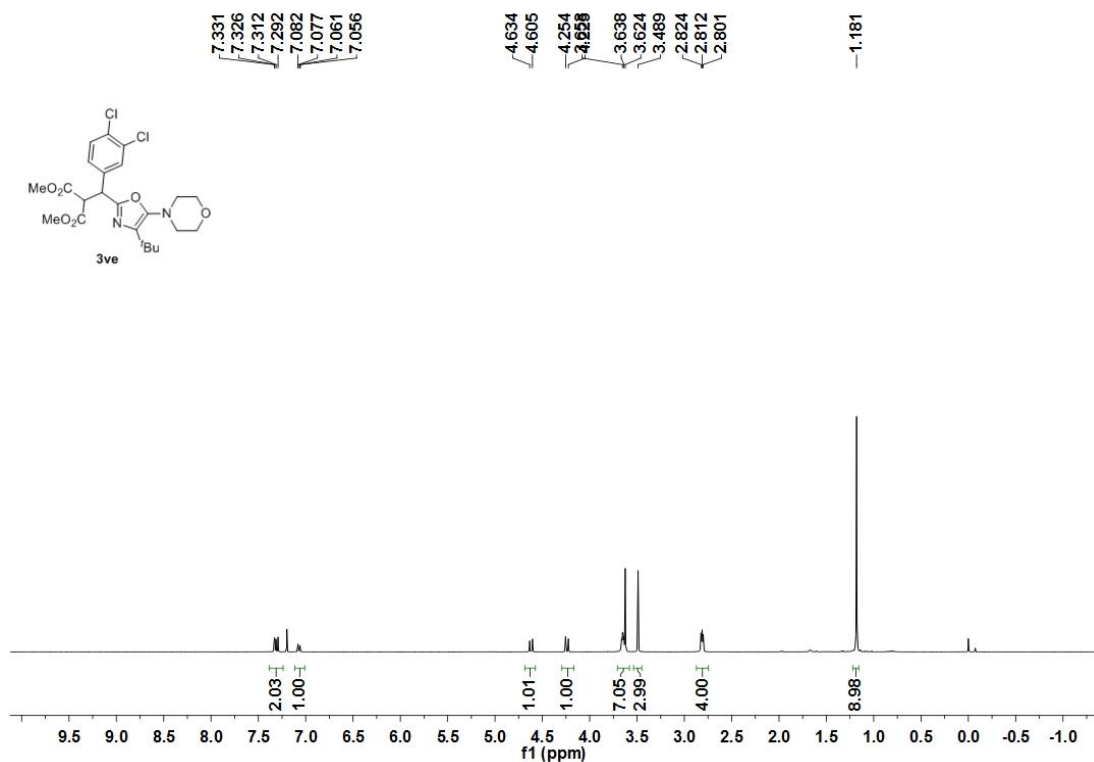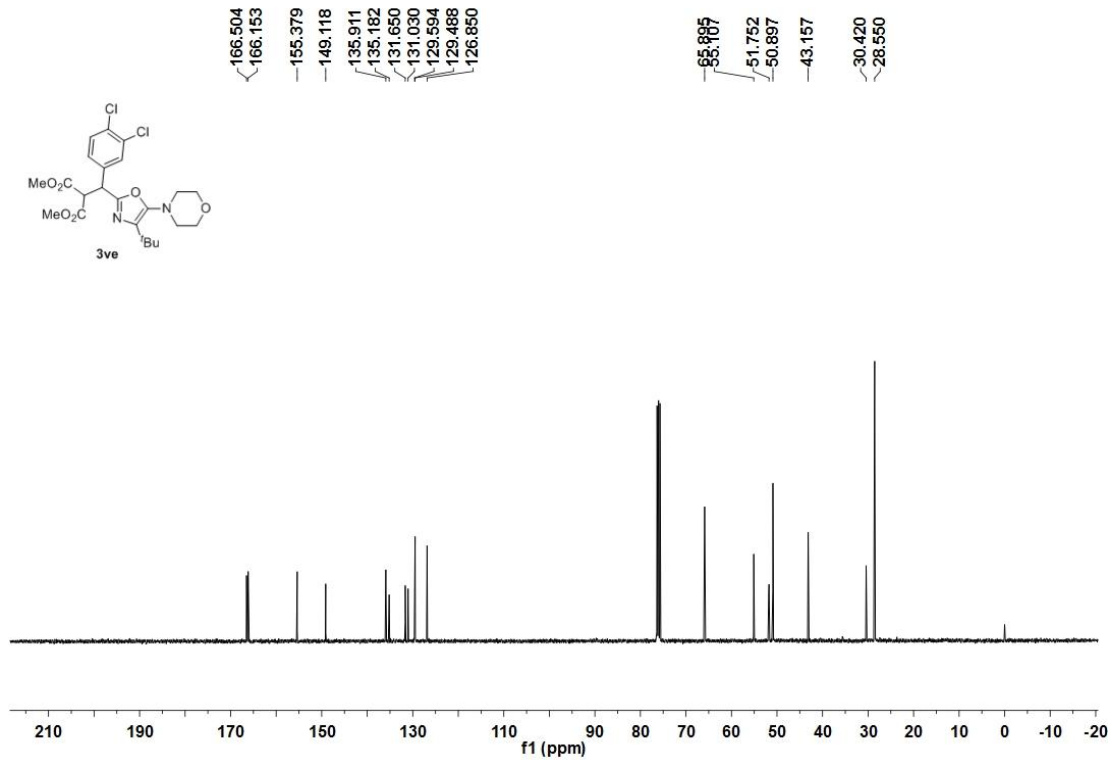

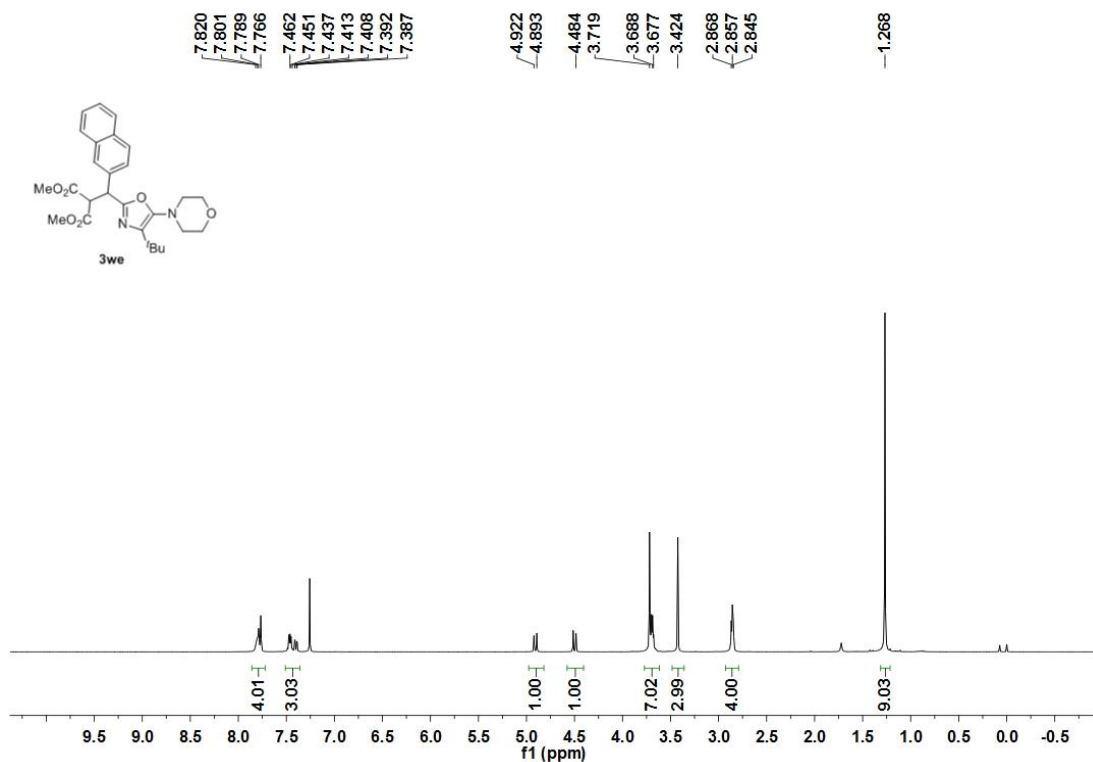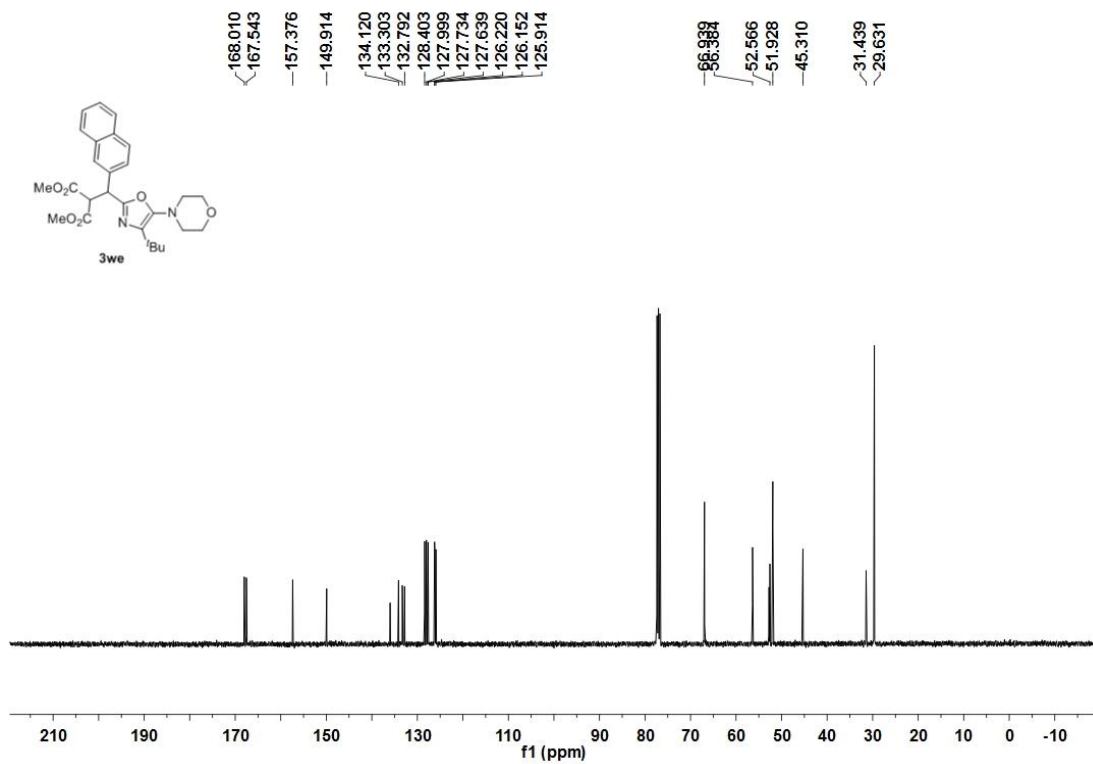

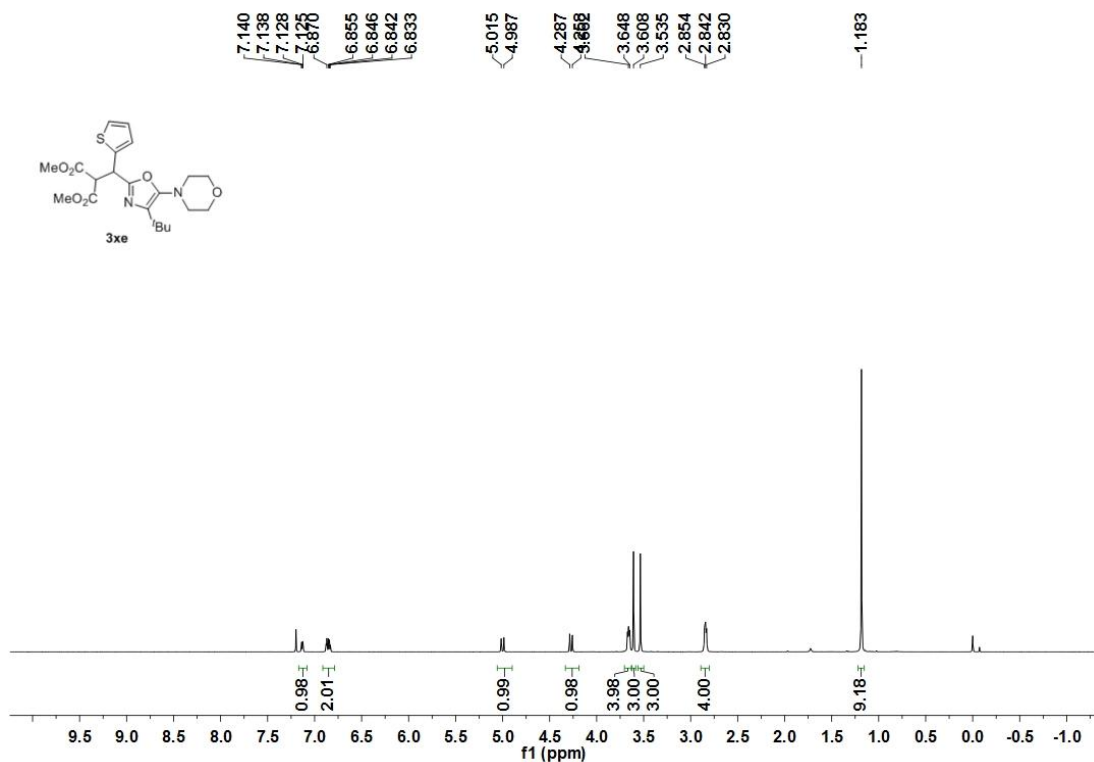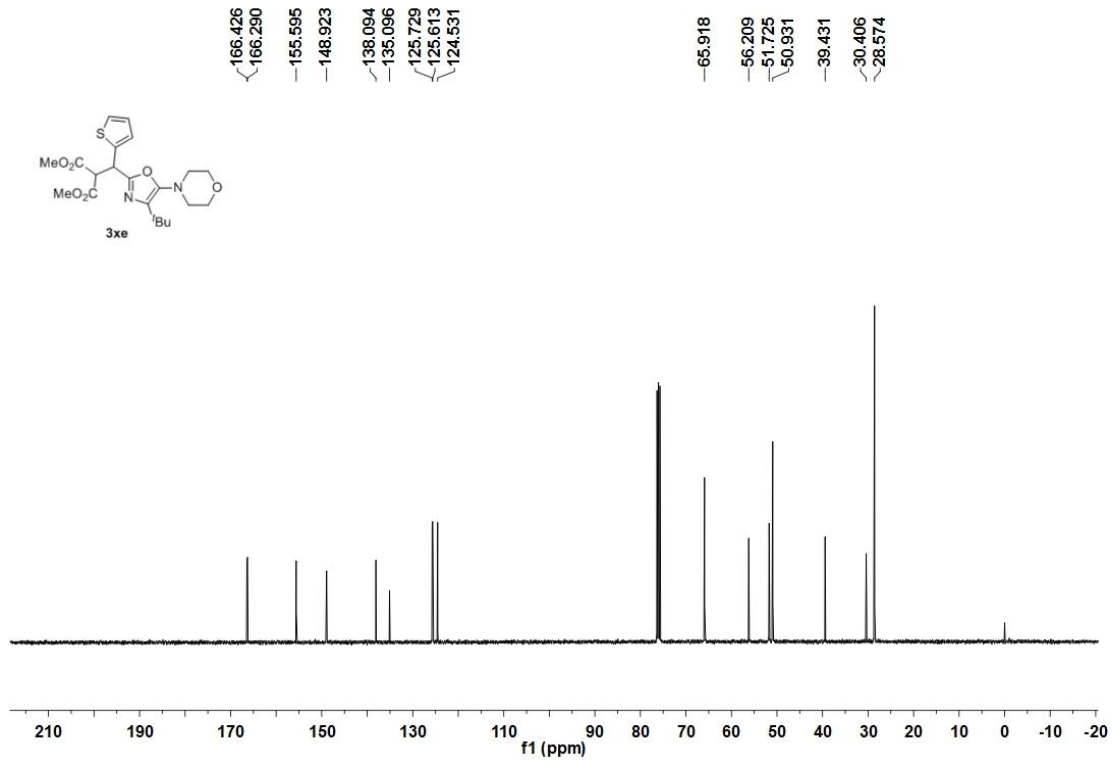

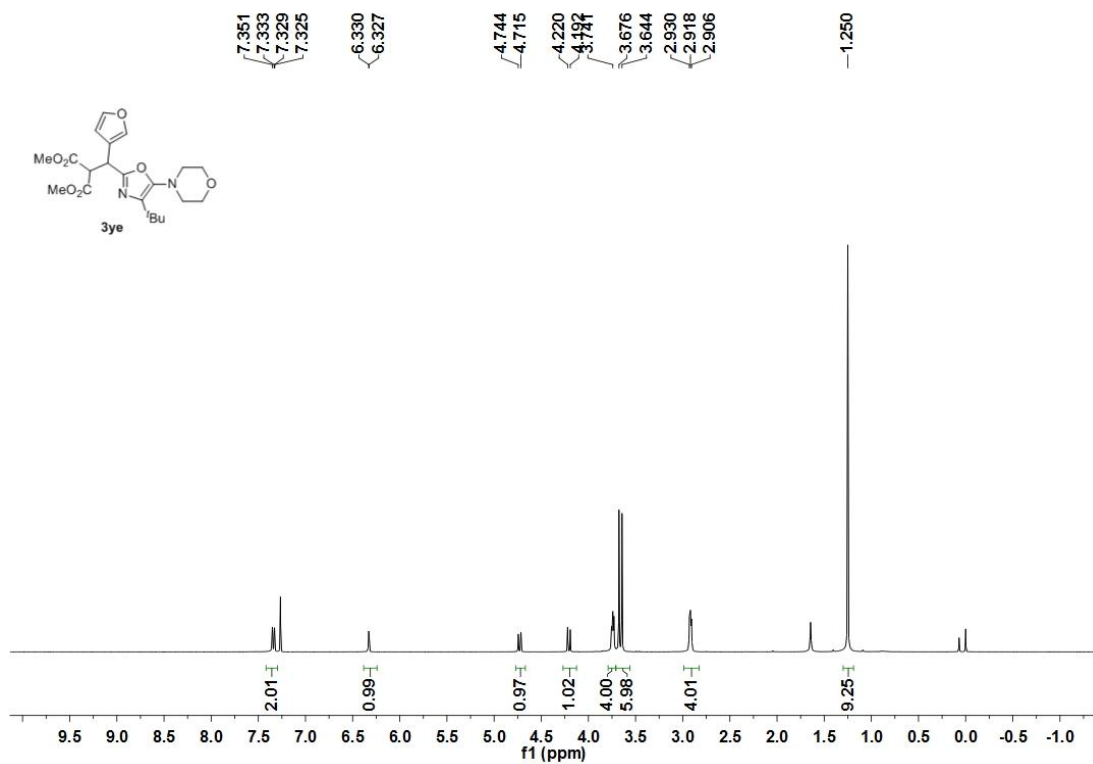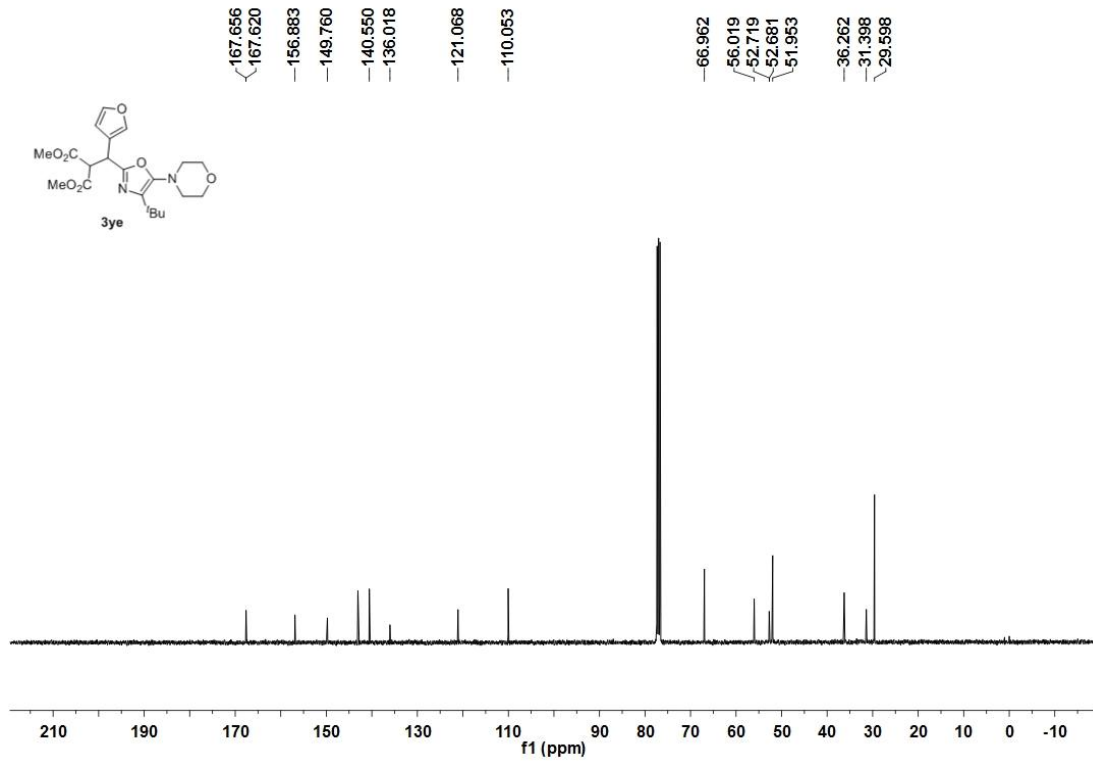

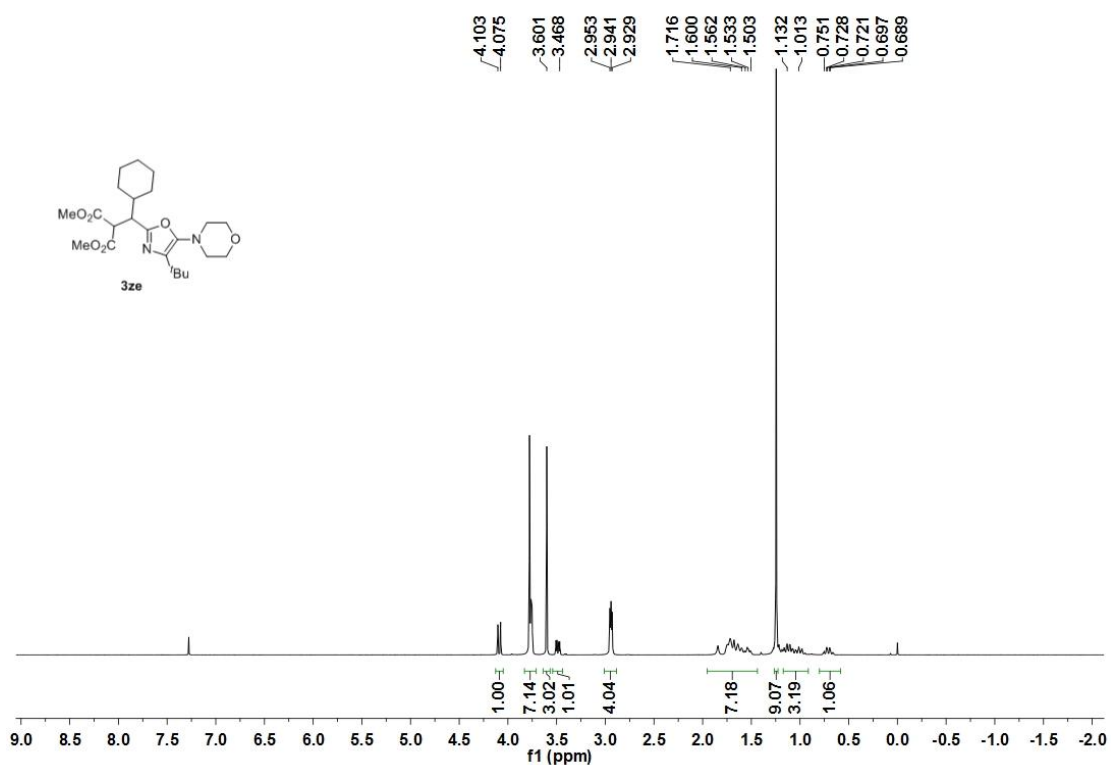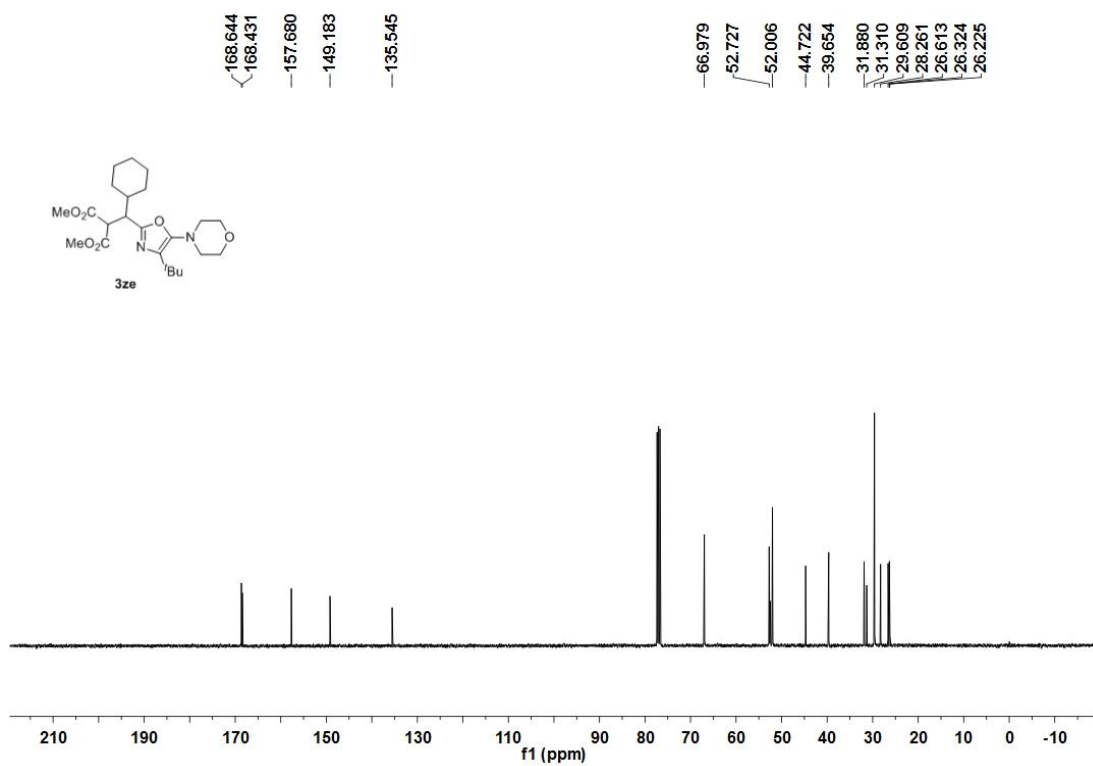

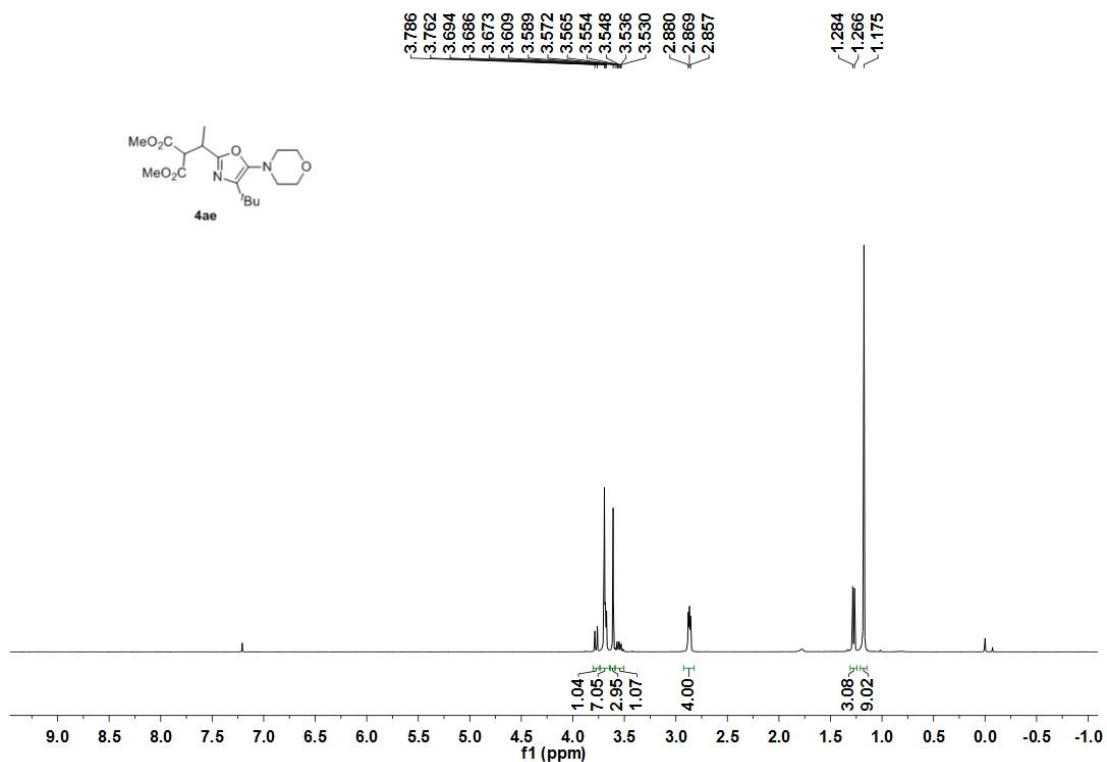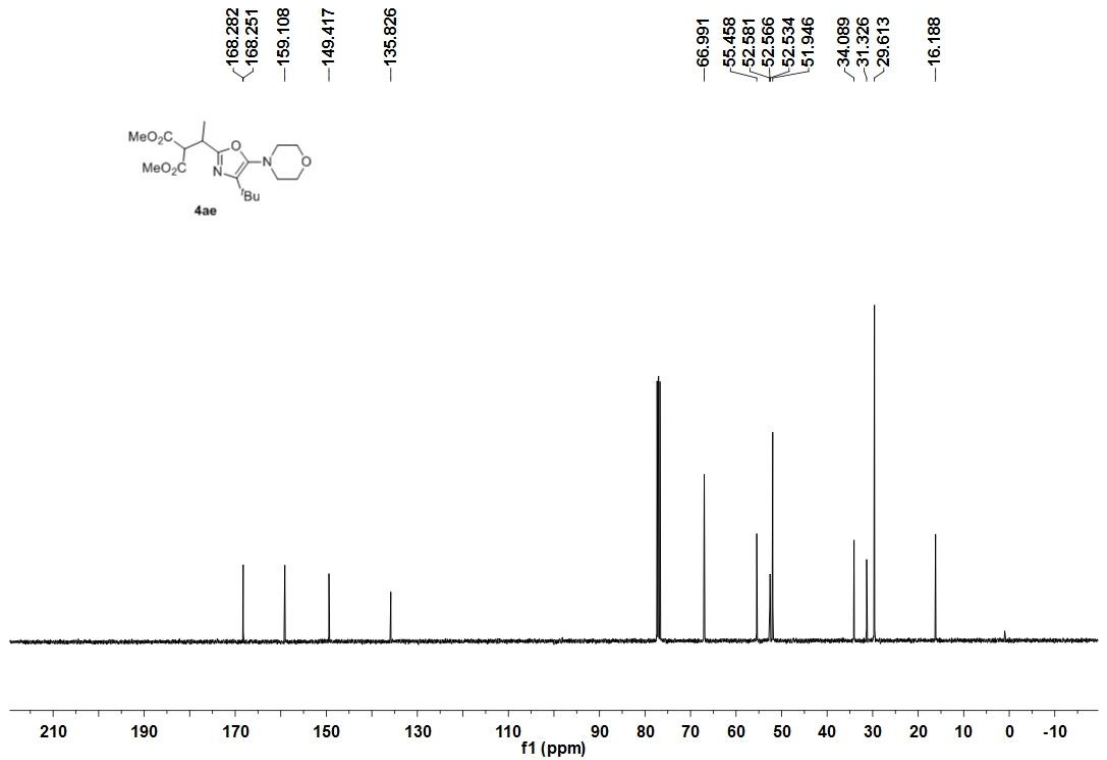

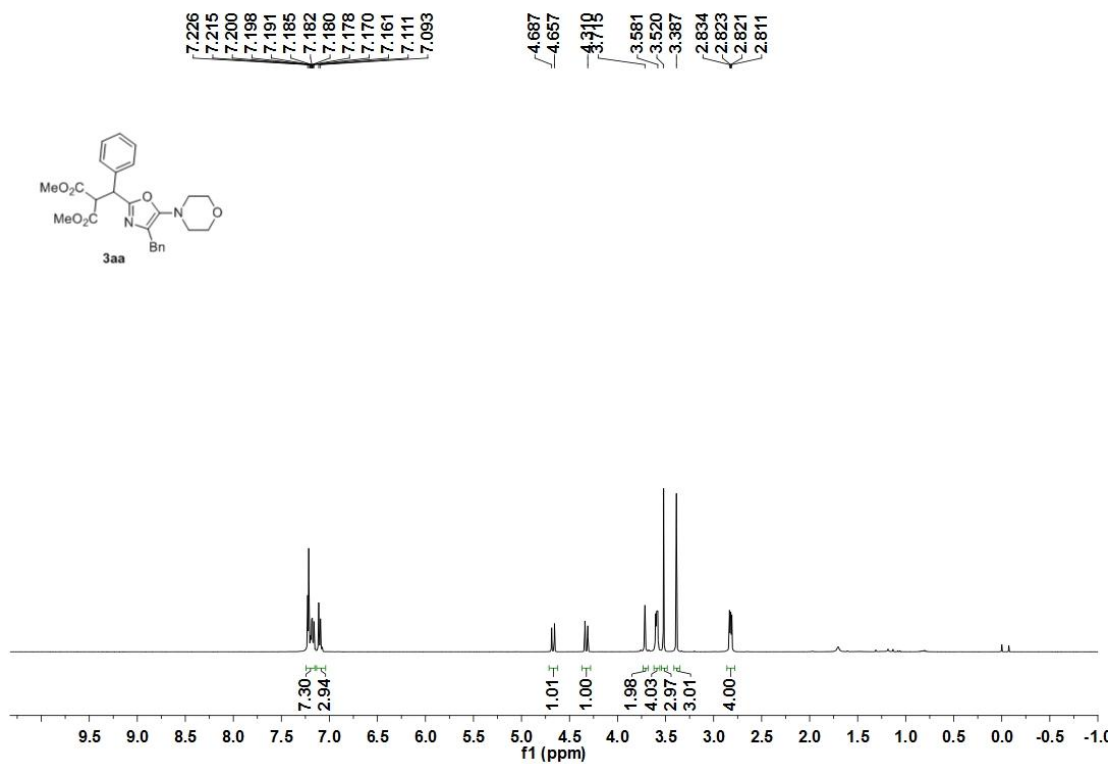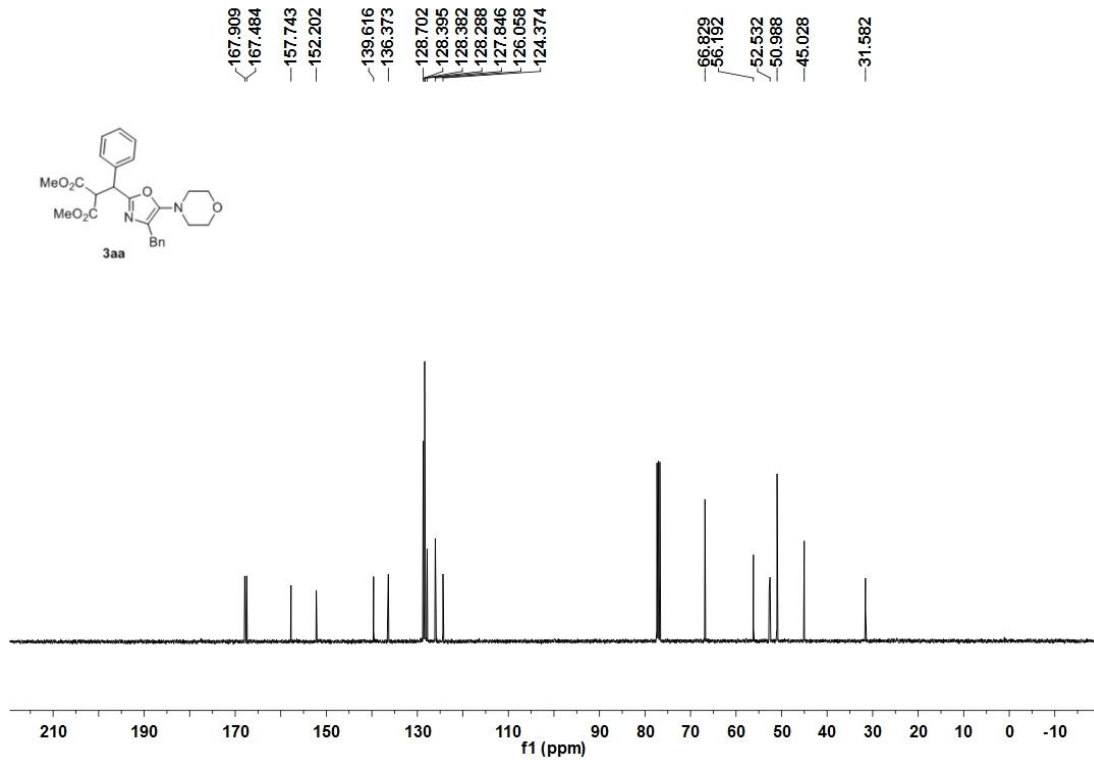

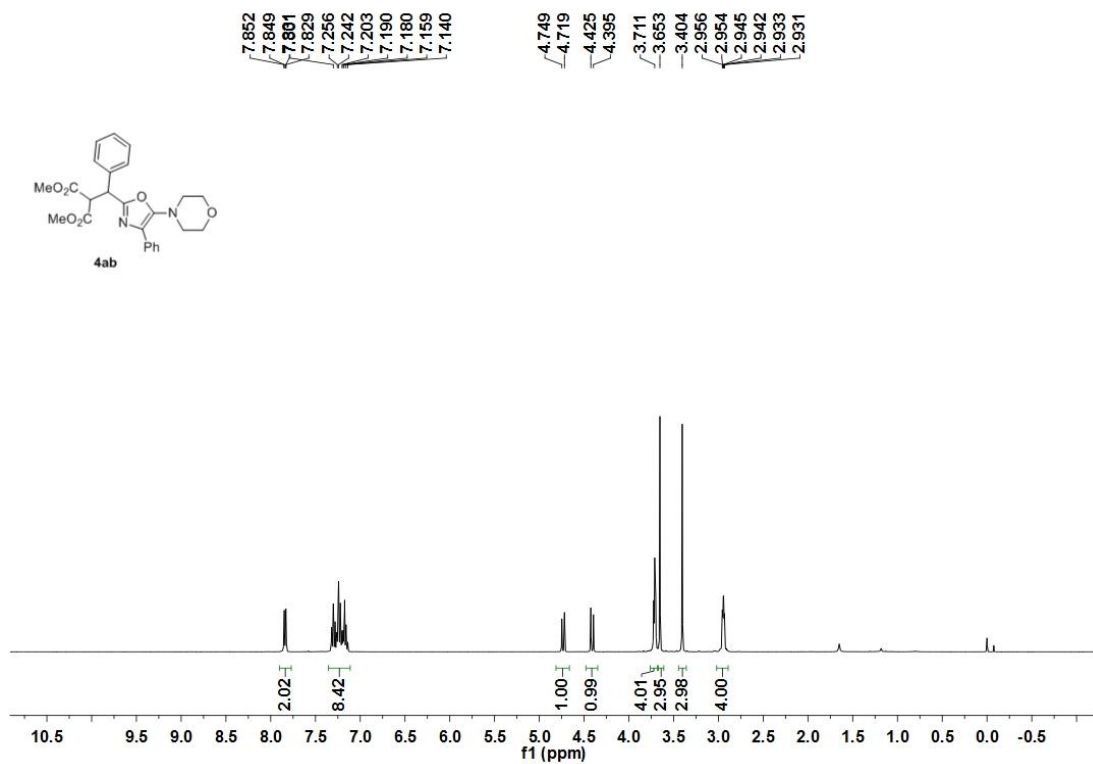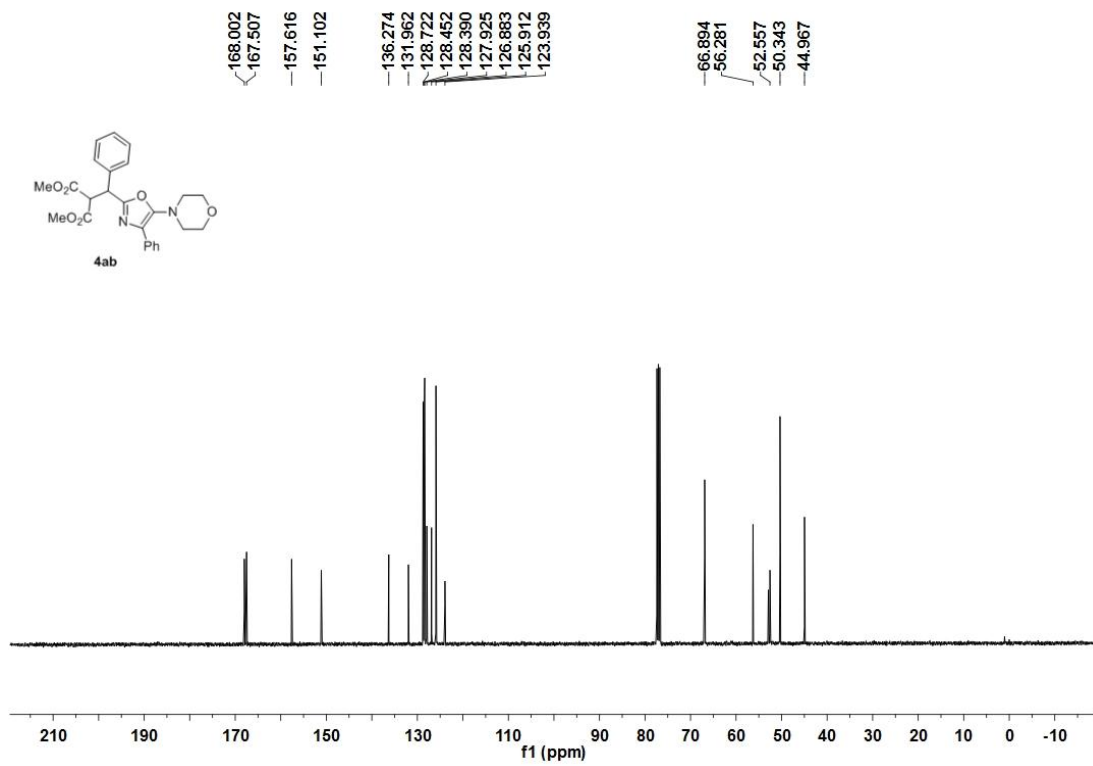



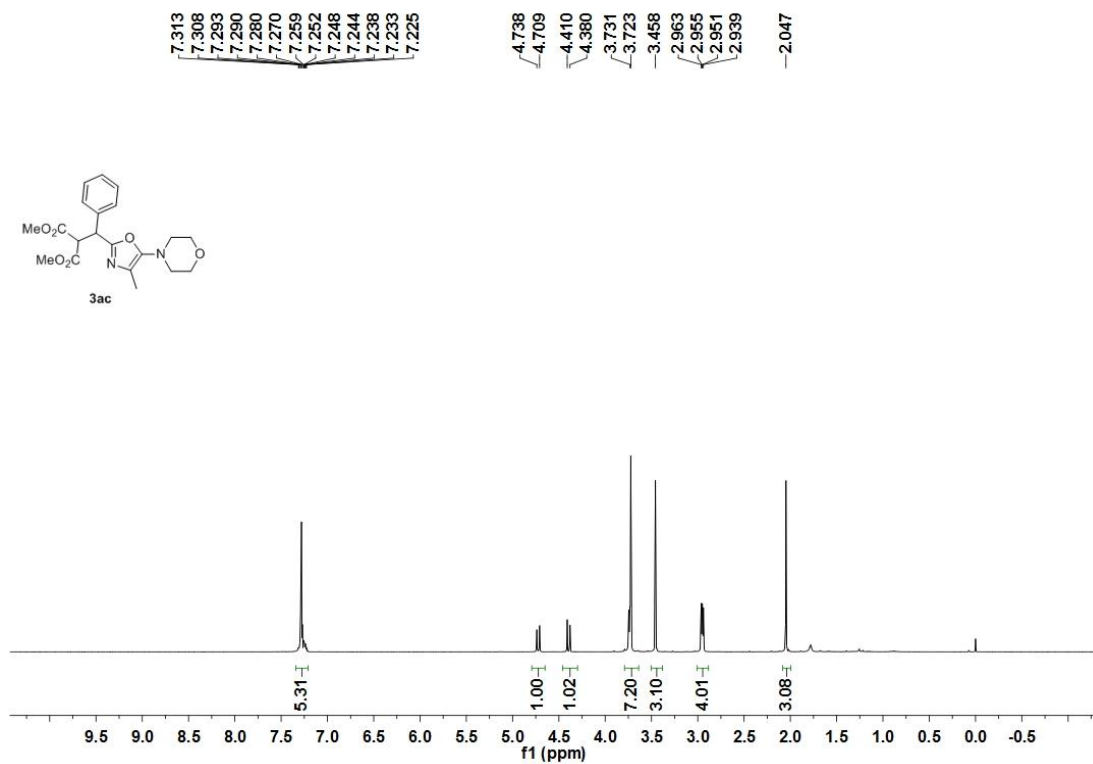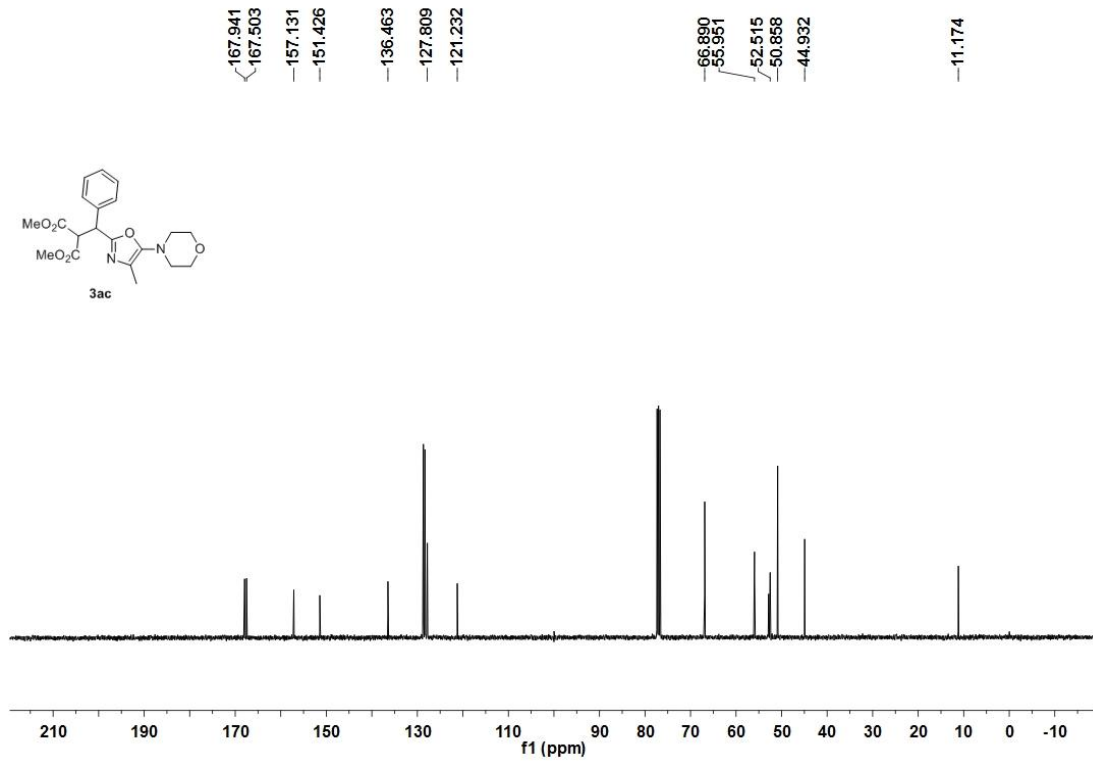

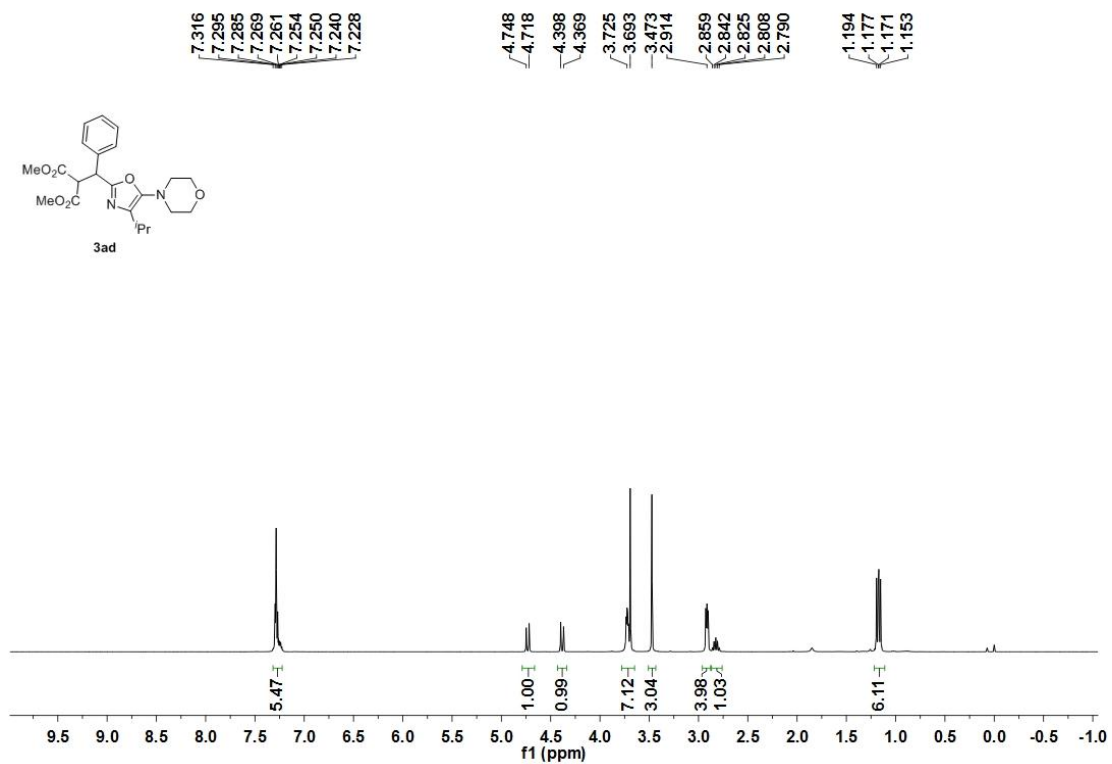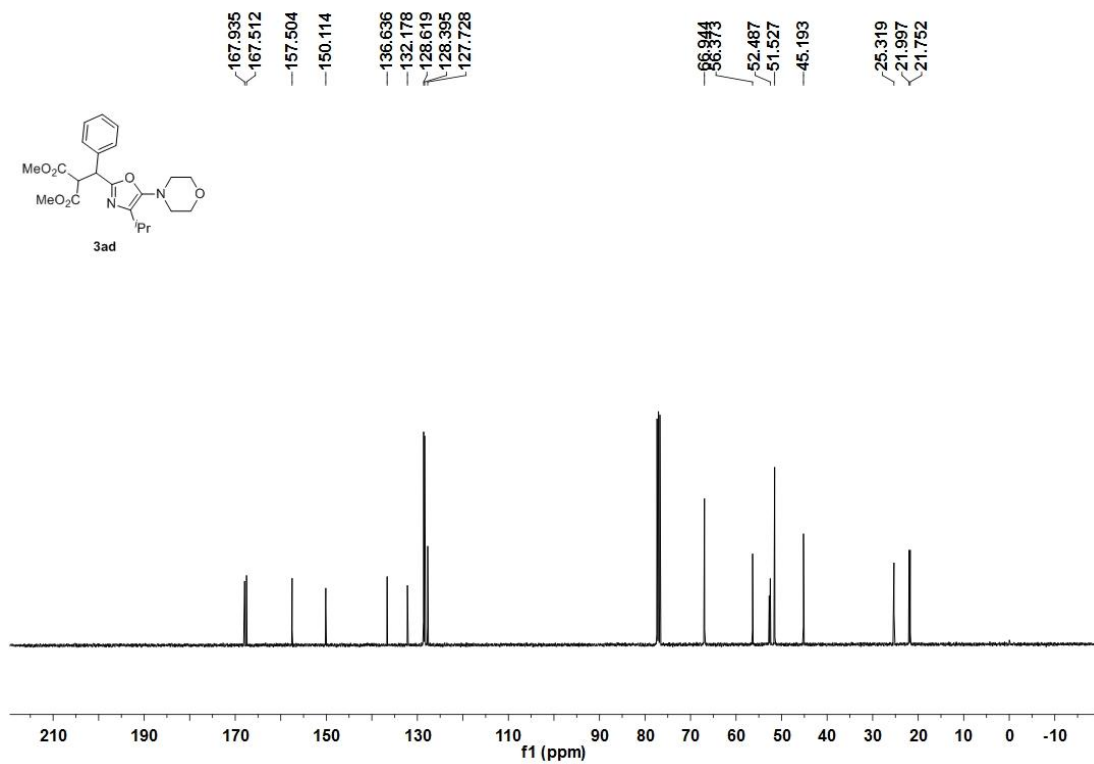

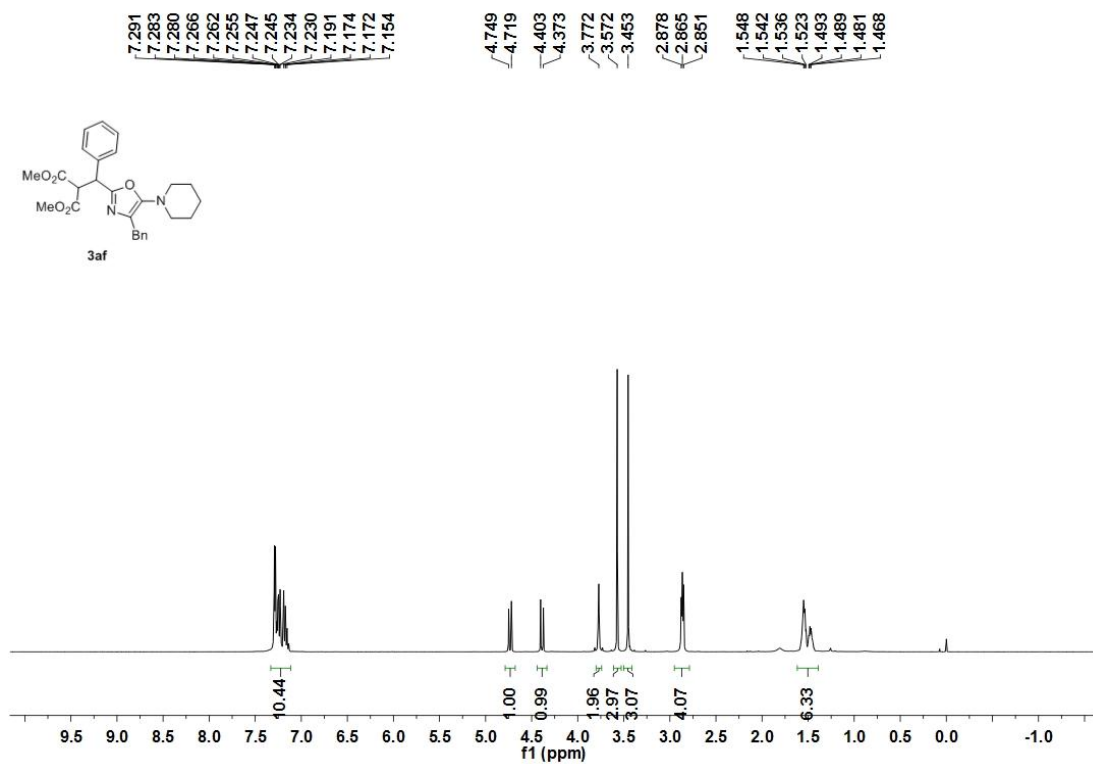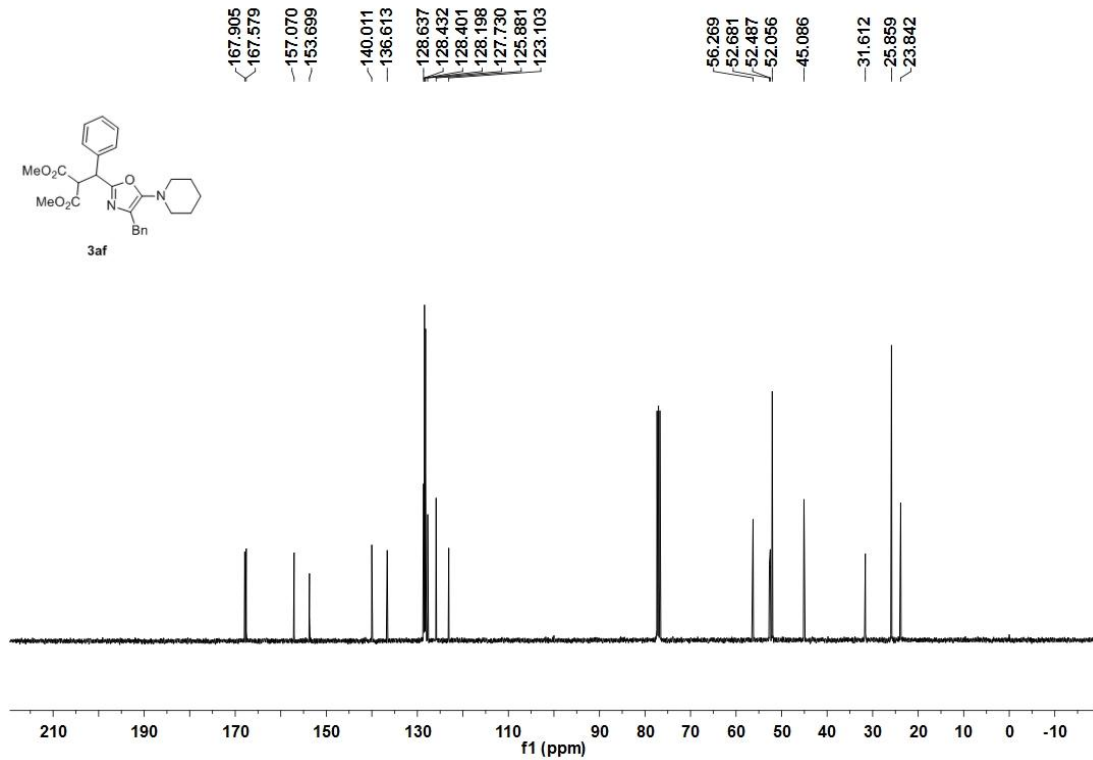

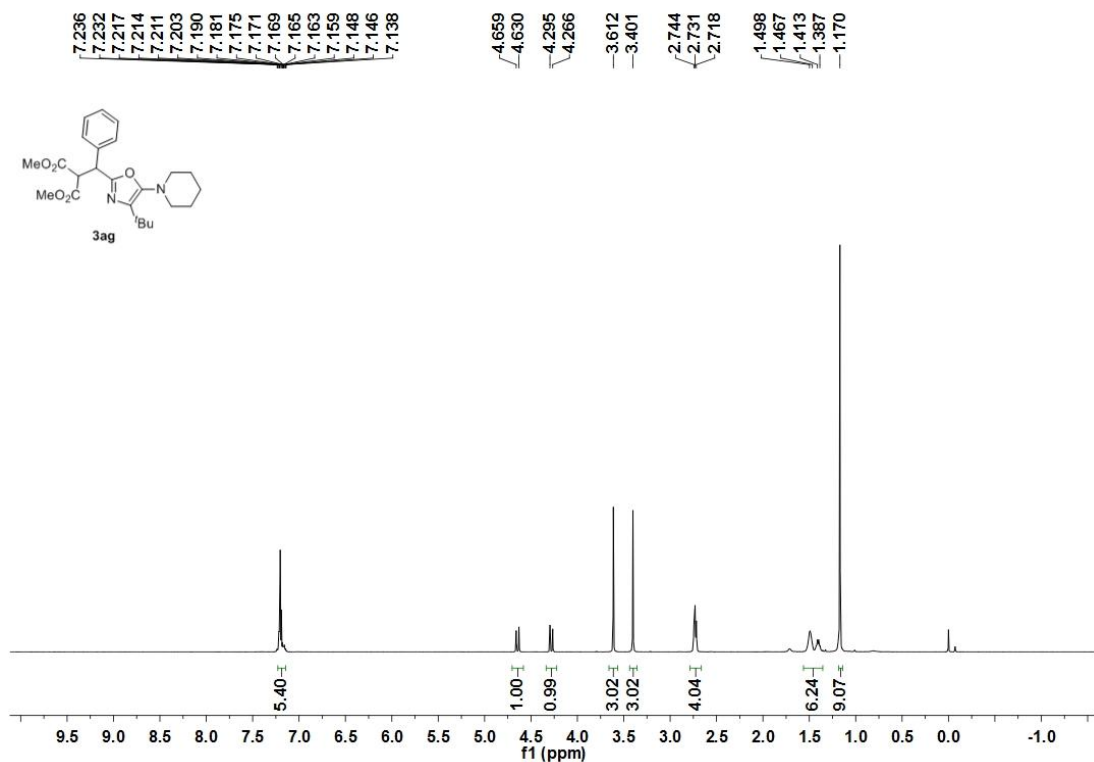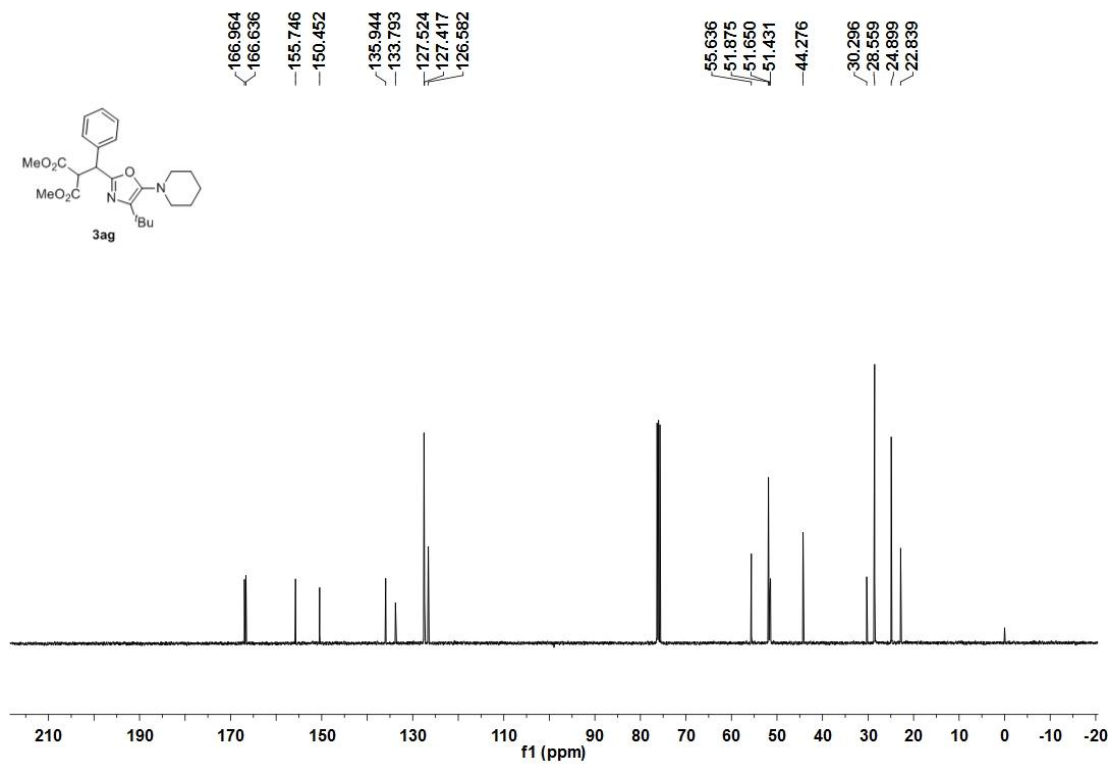

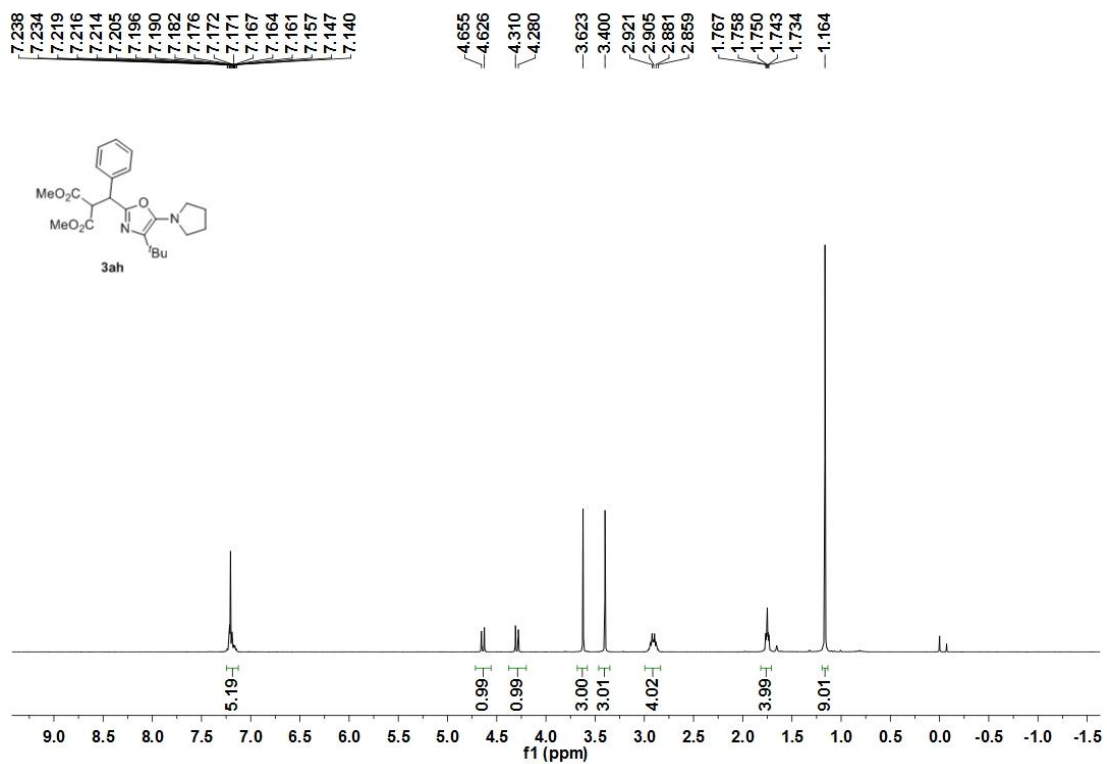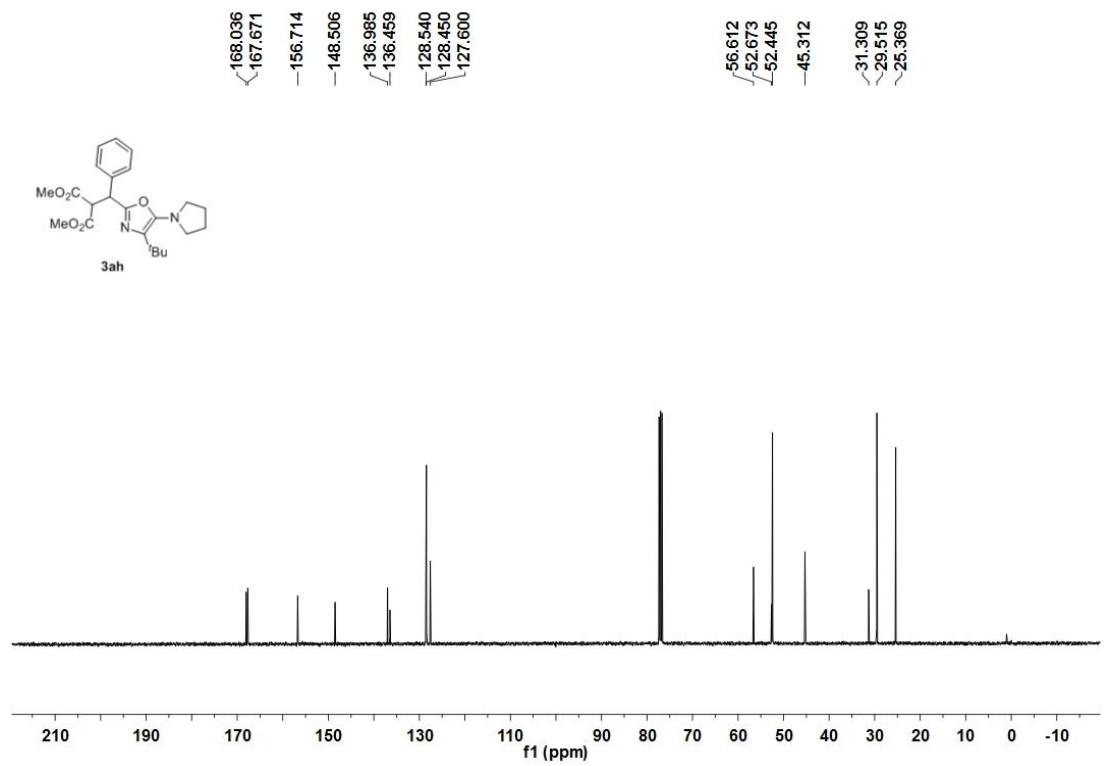

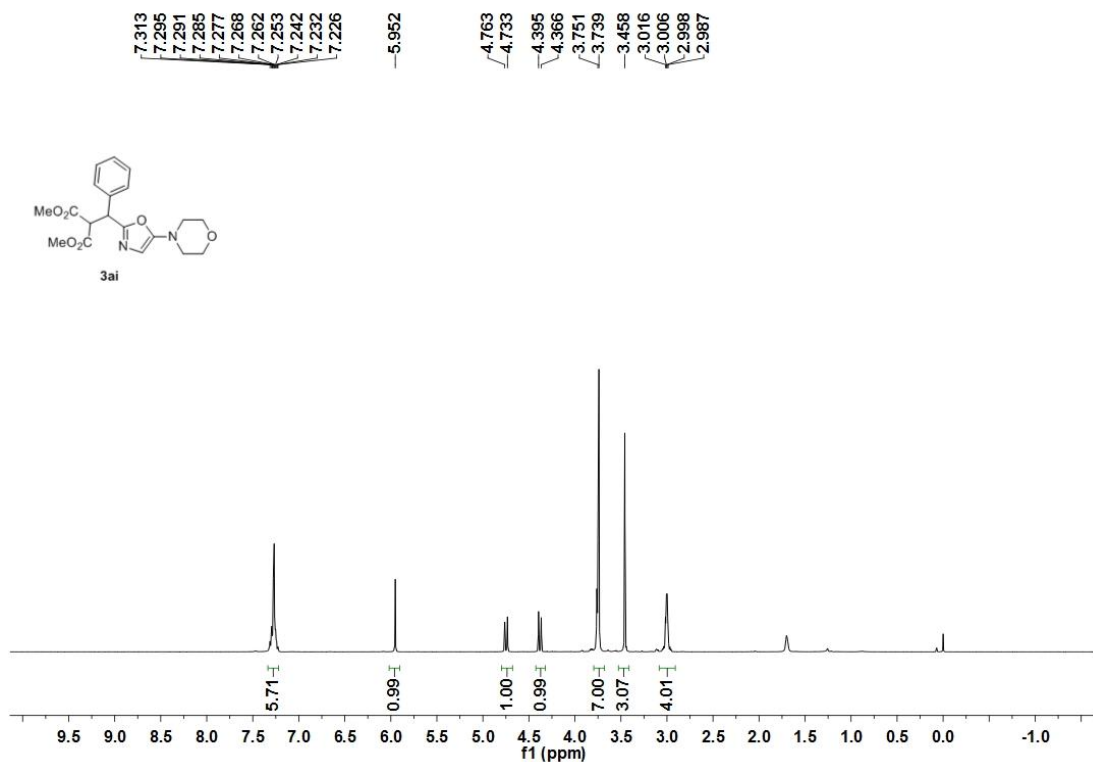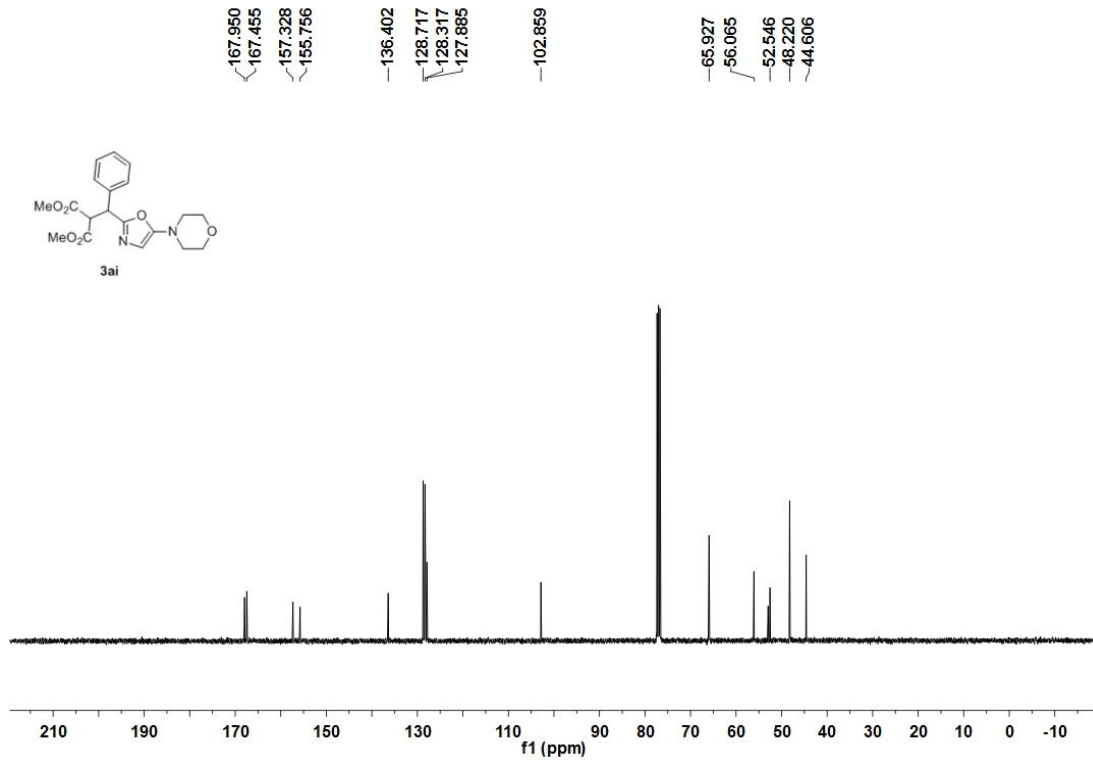

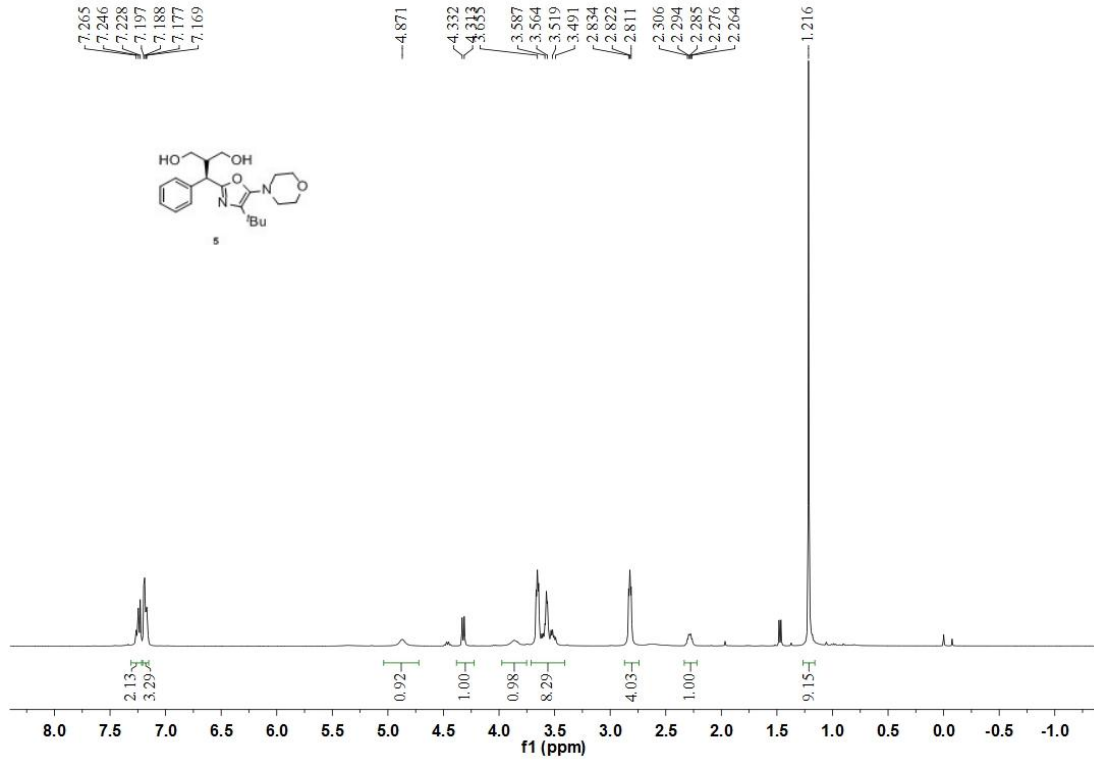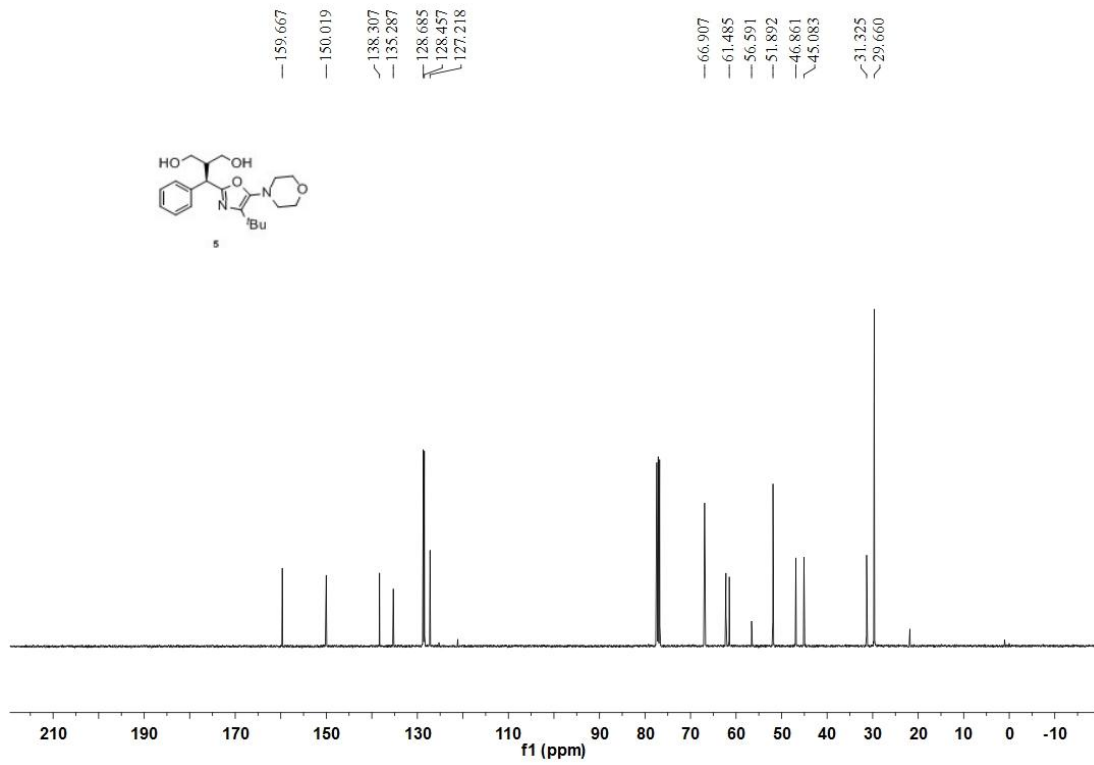

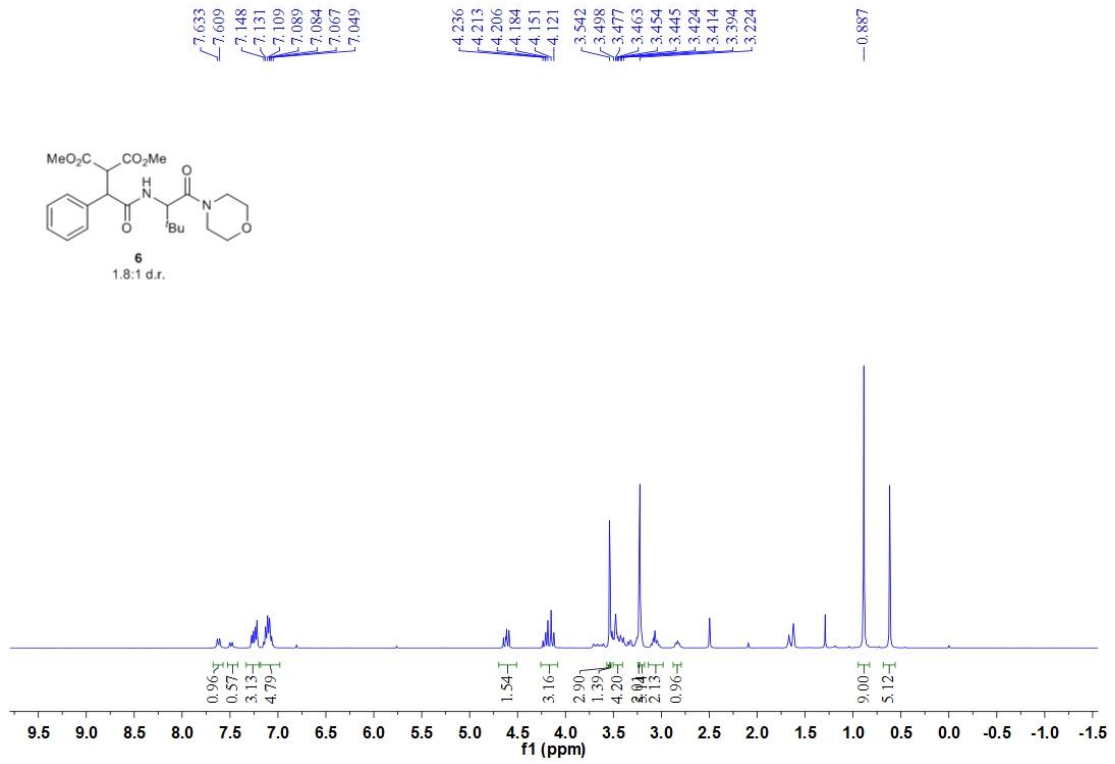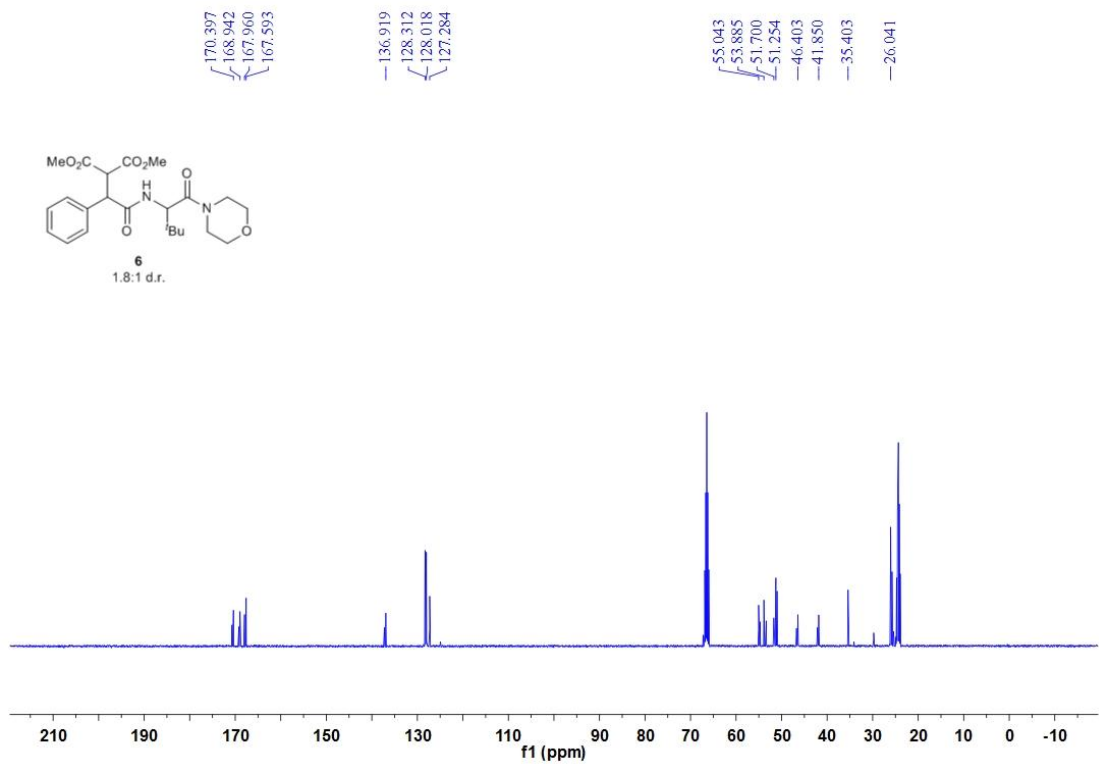



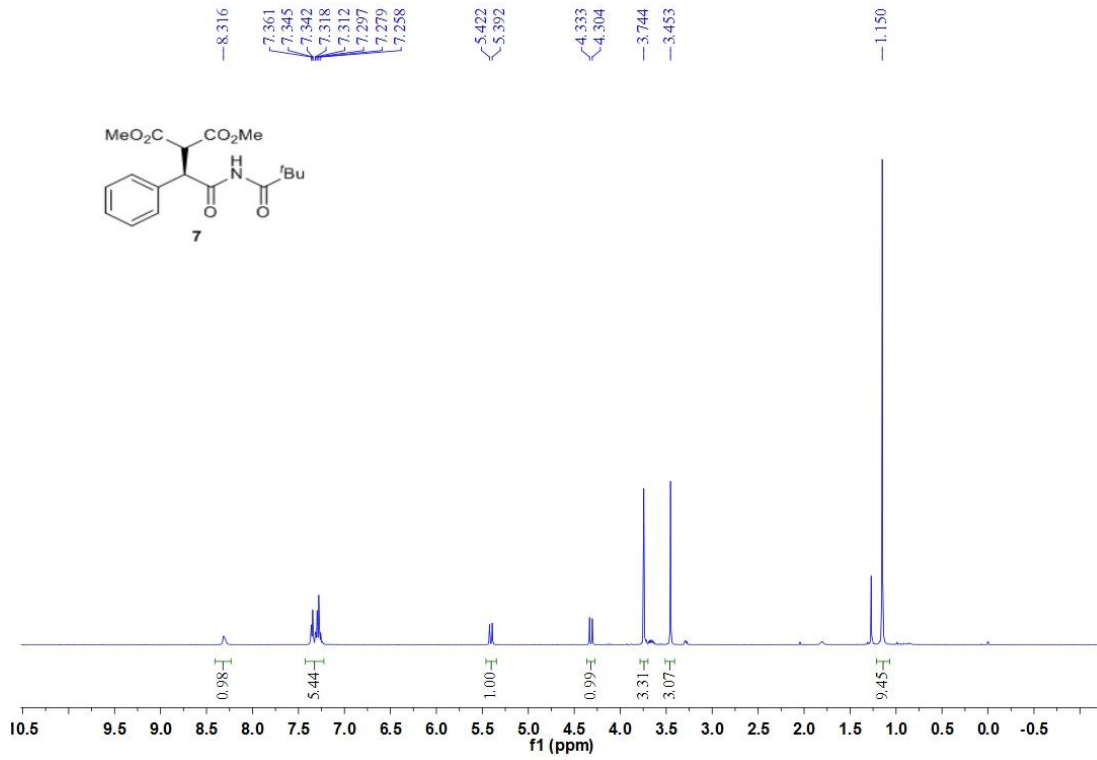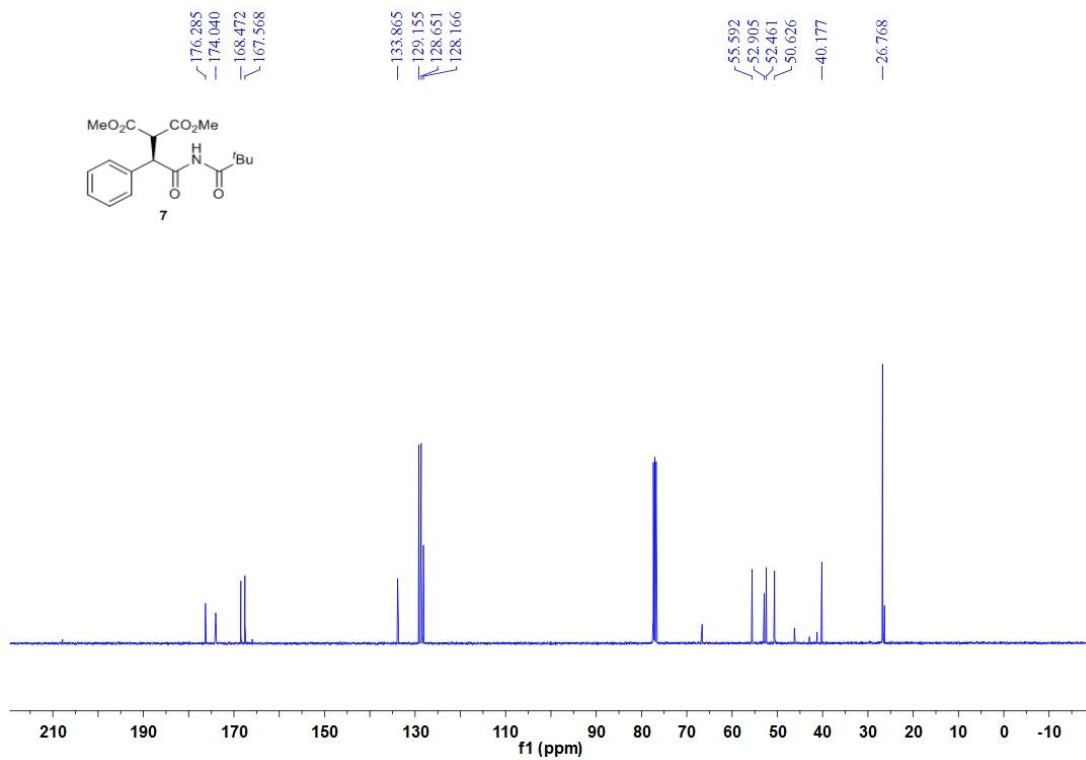

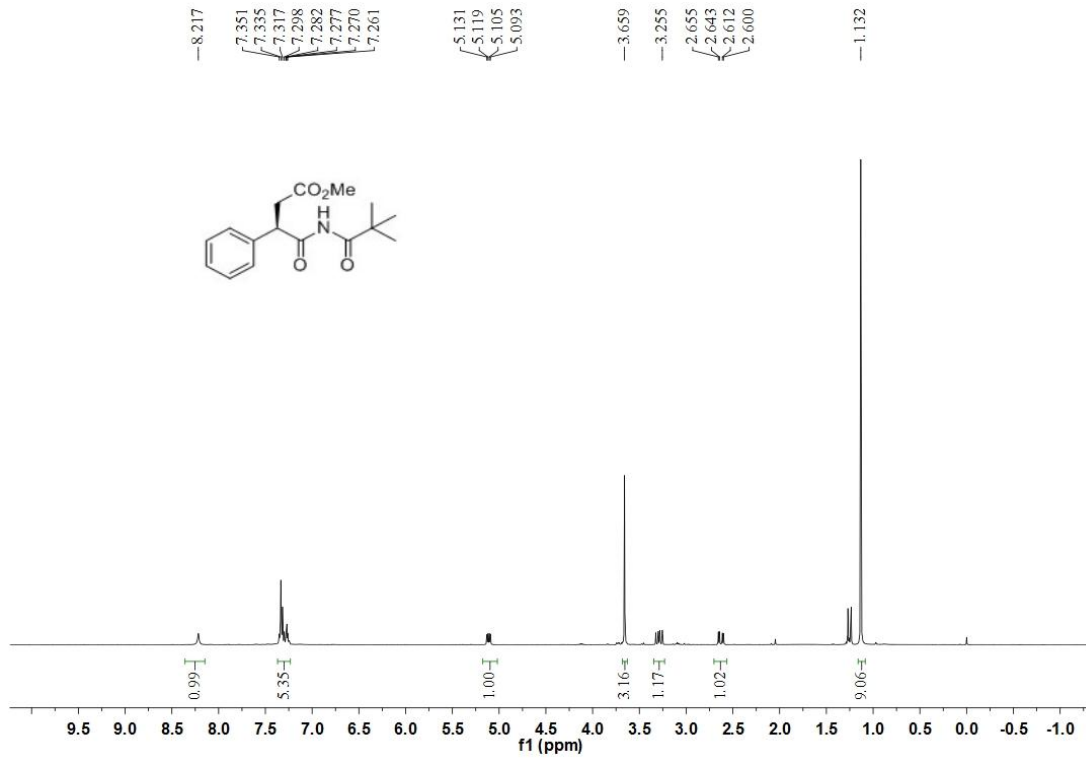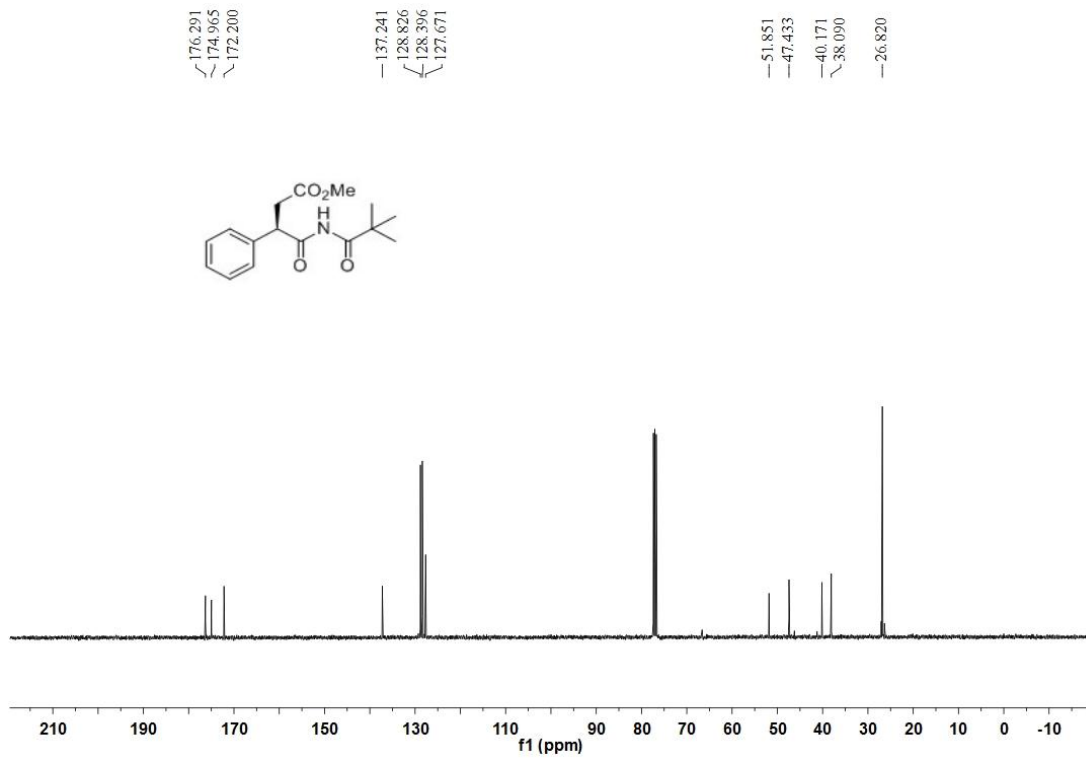

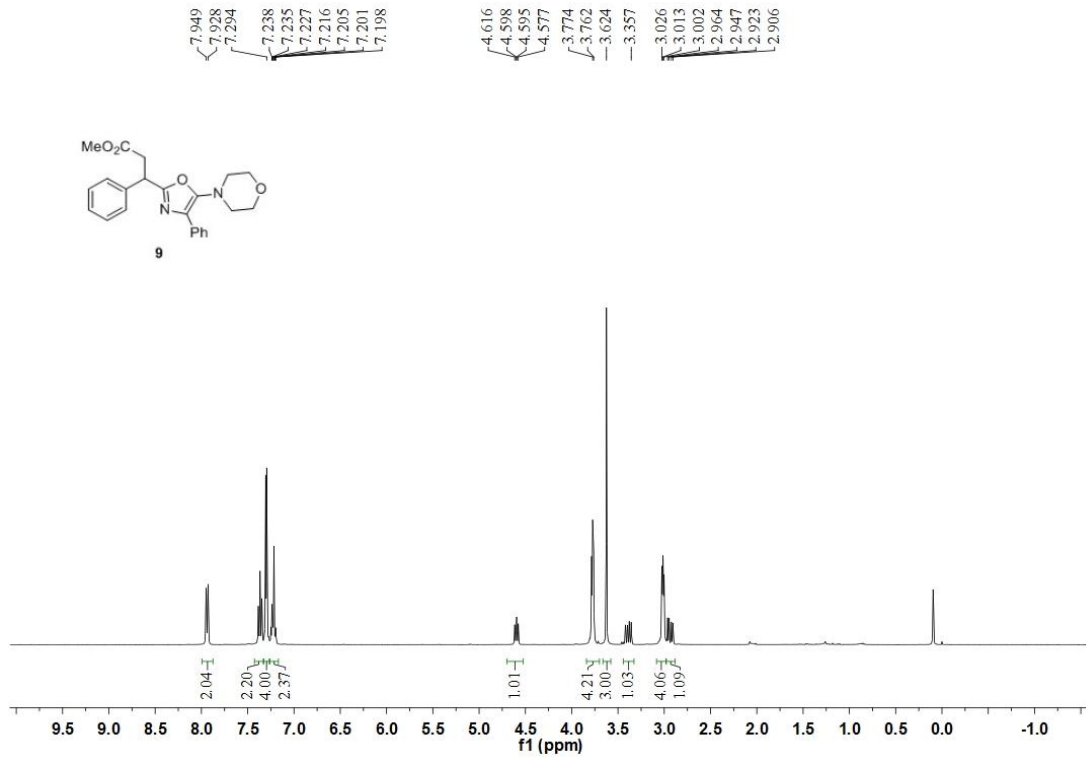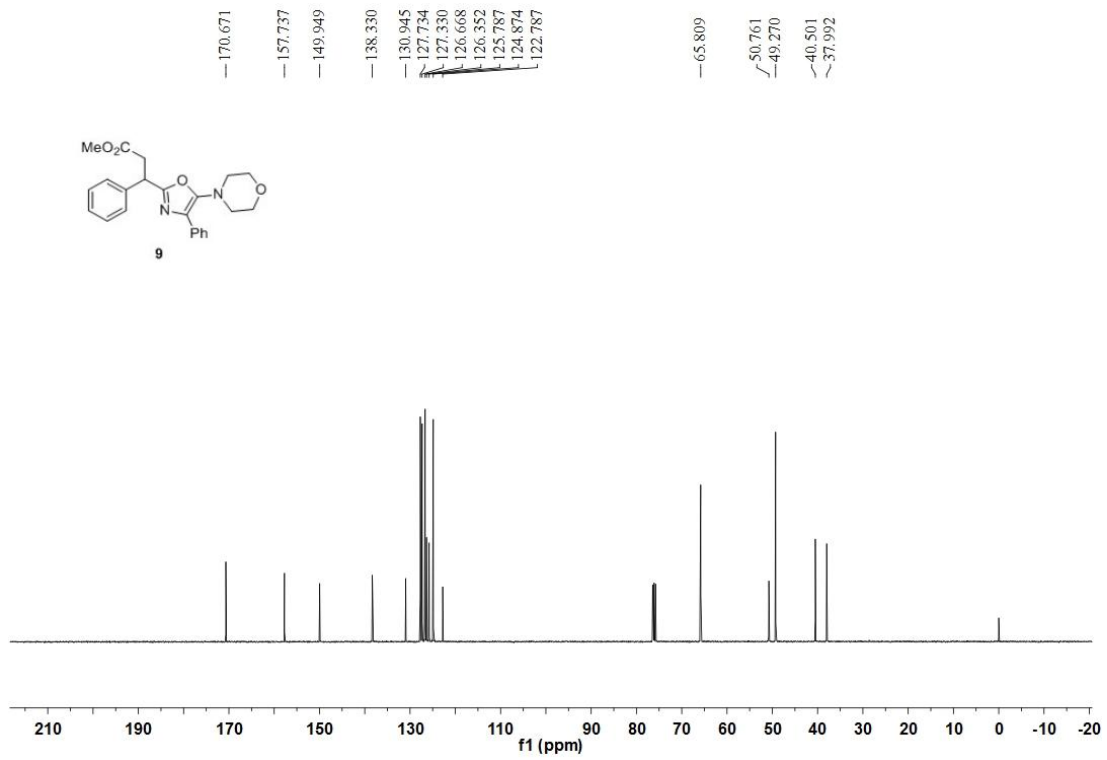

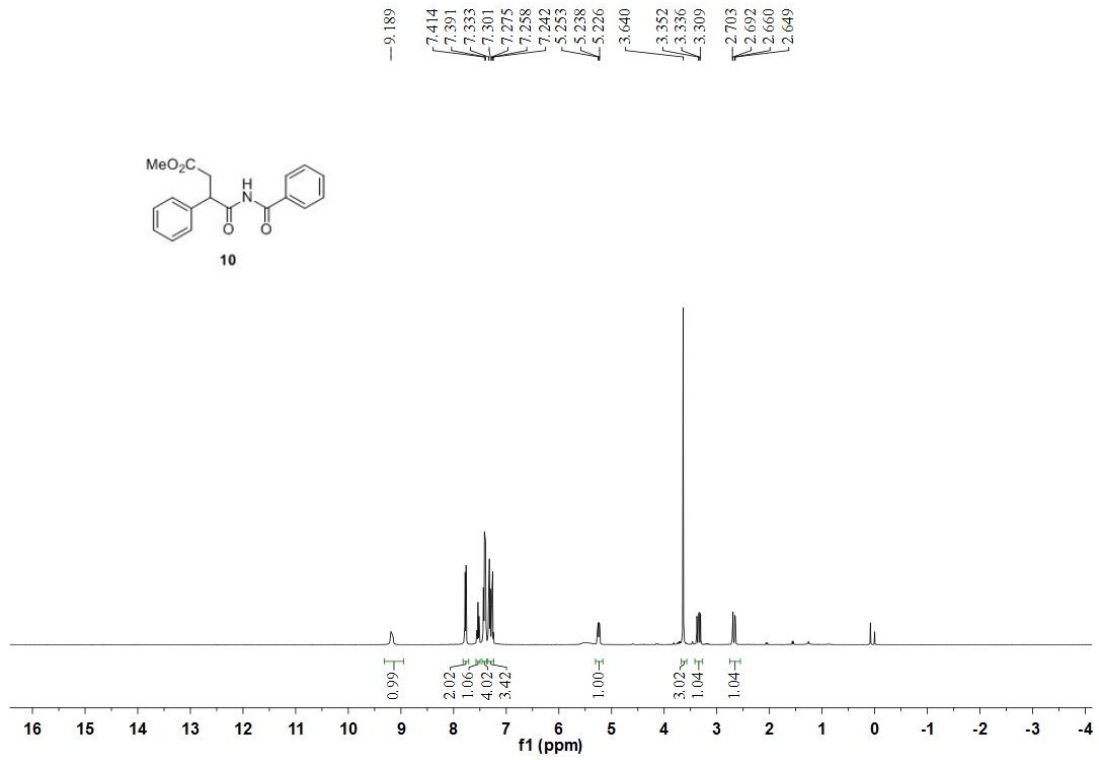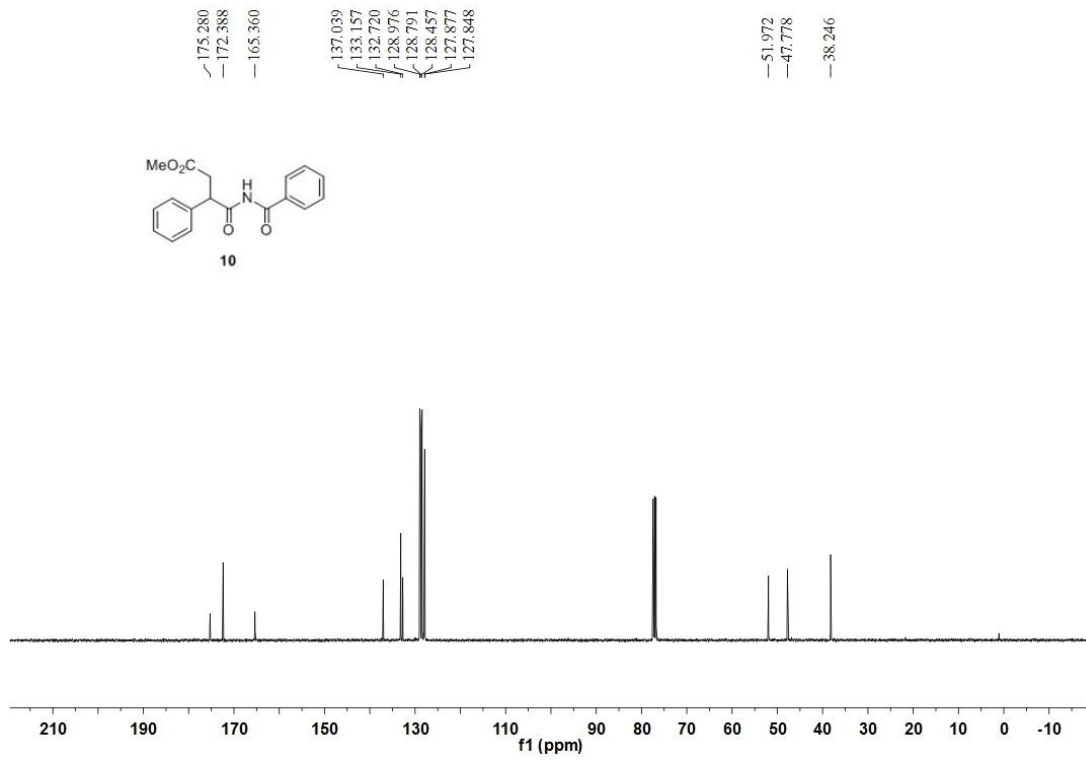

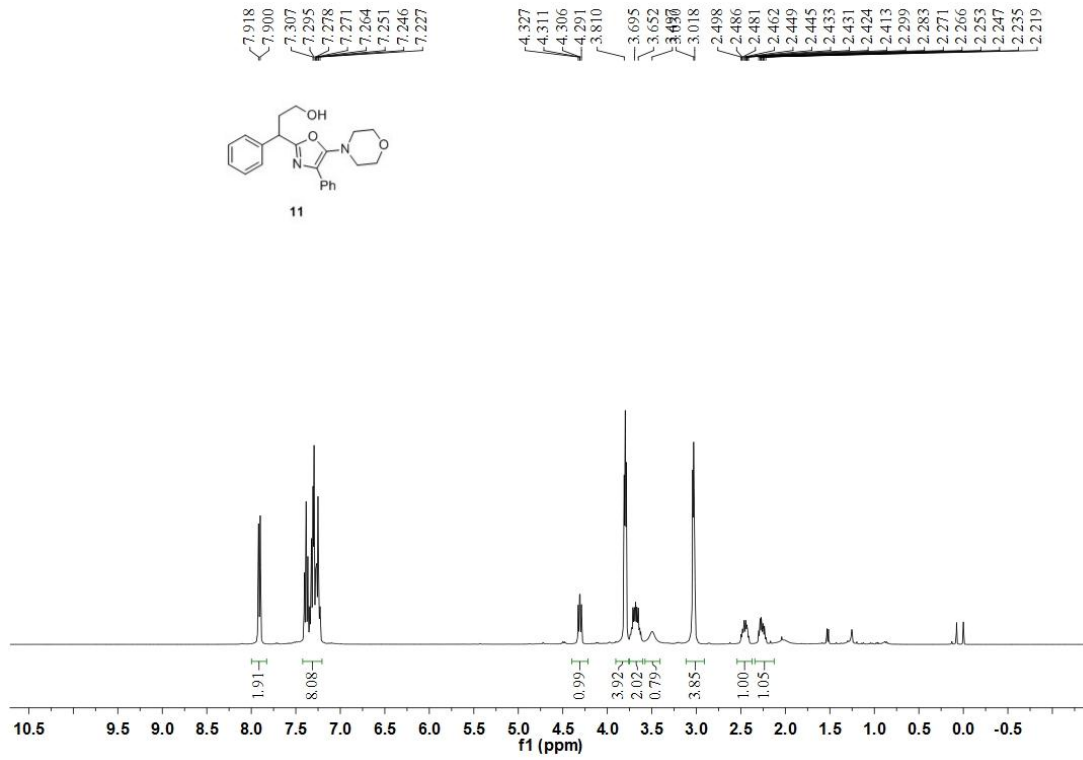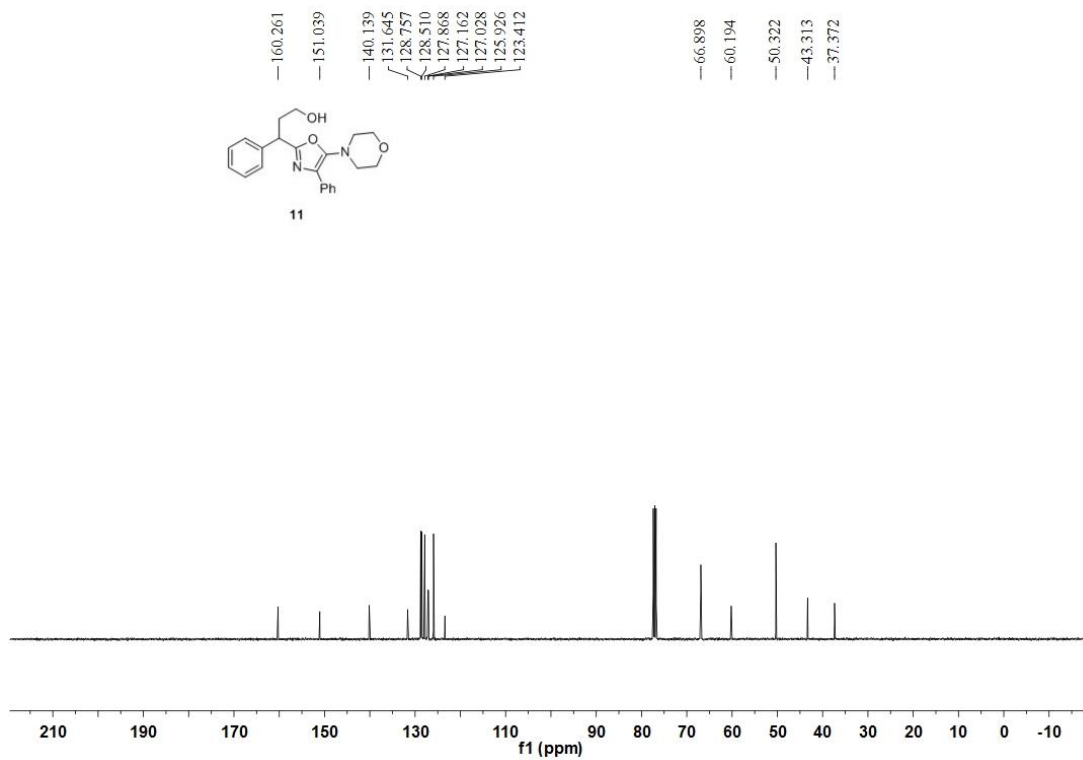

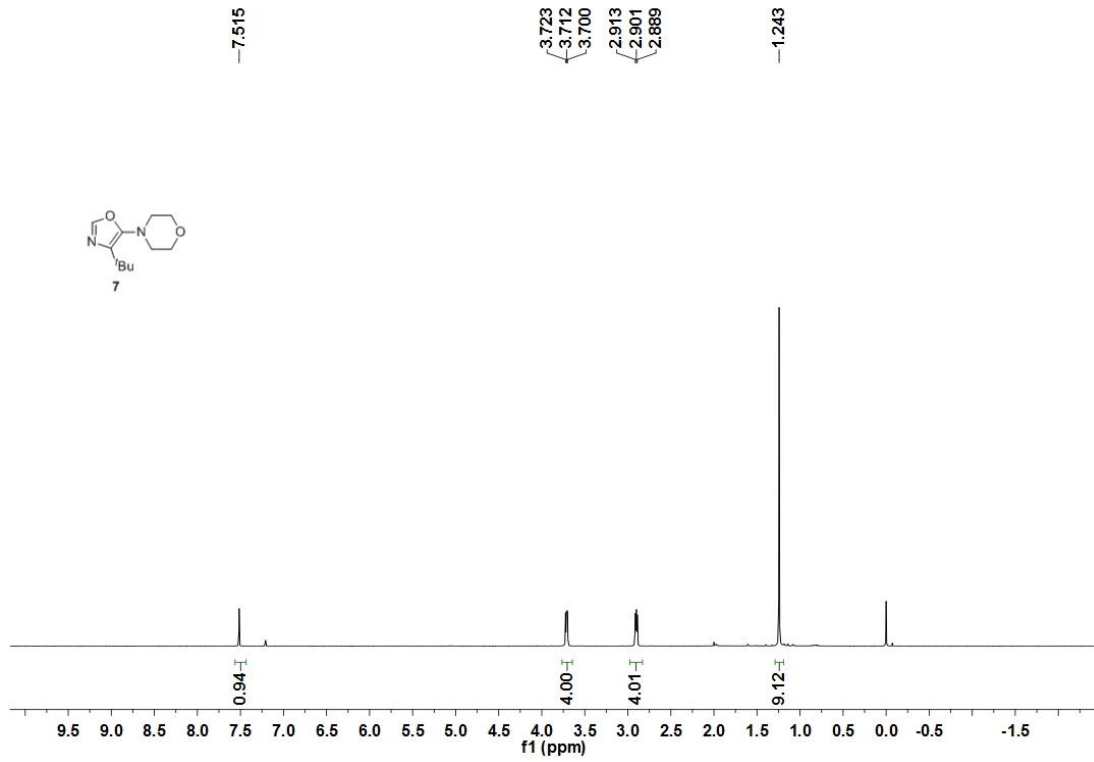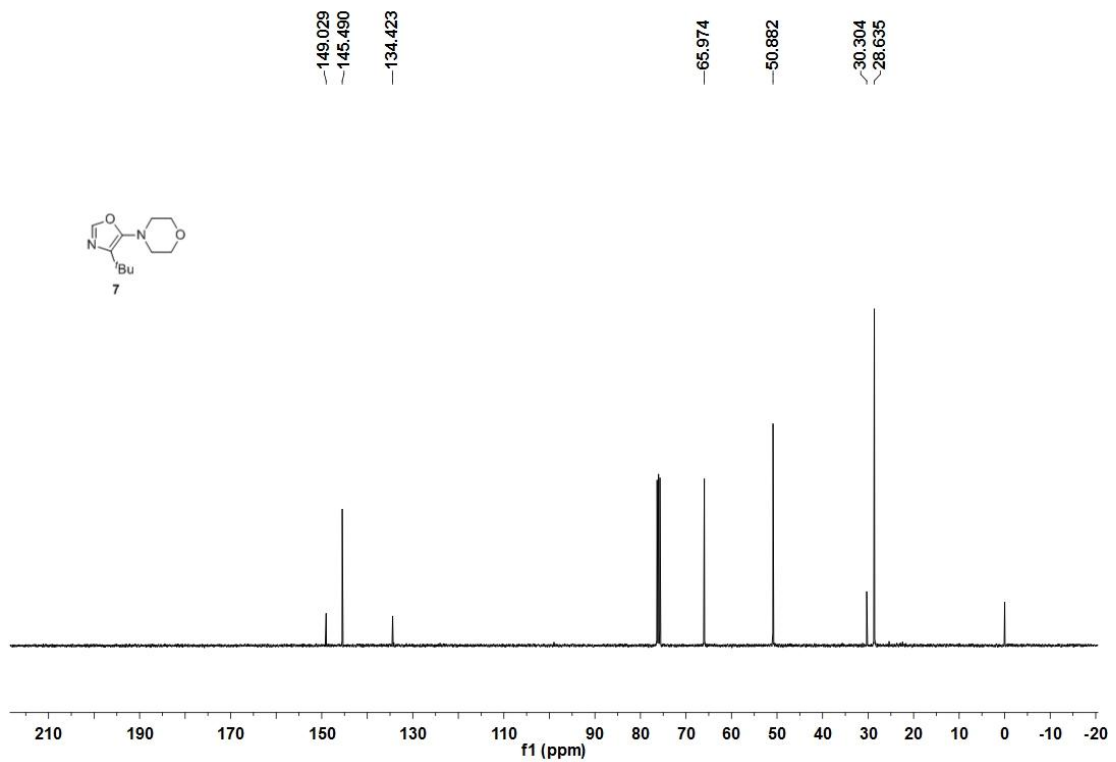

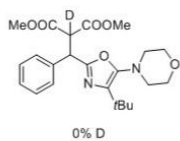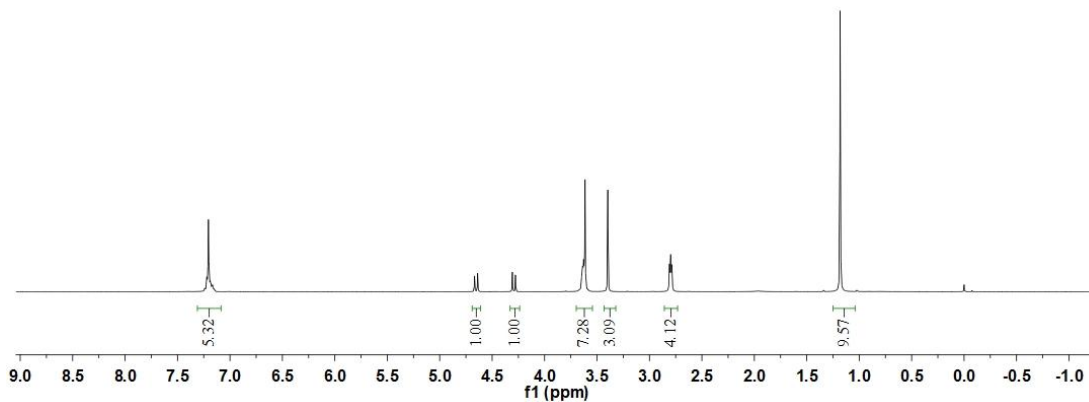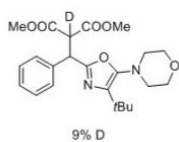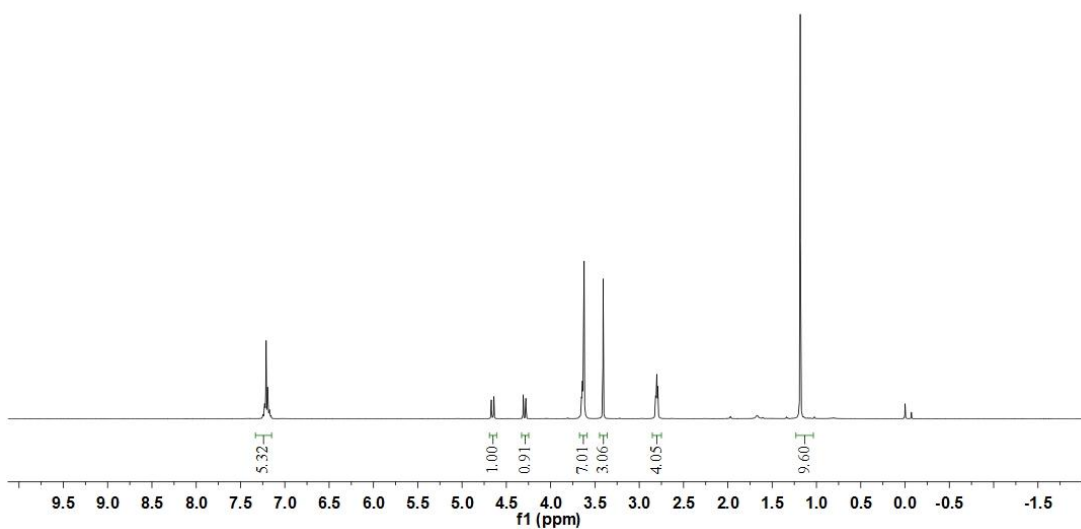

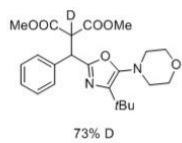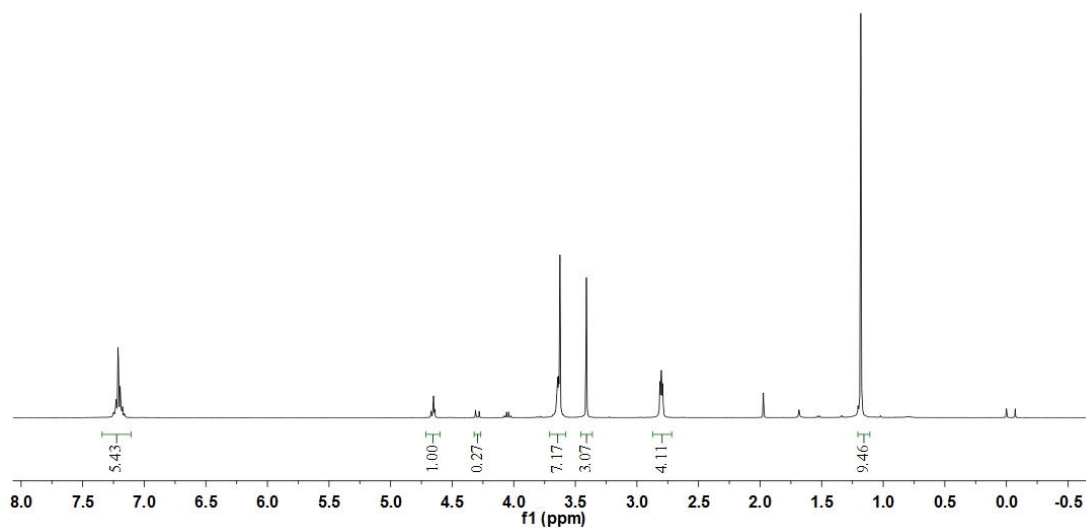



# Copy of CD spectra

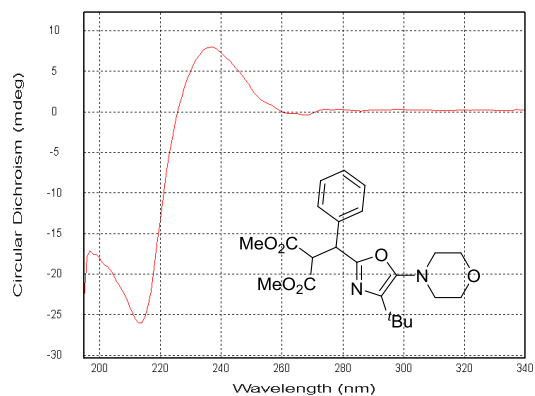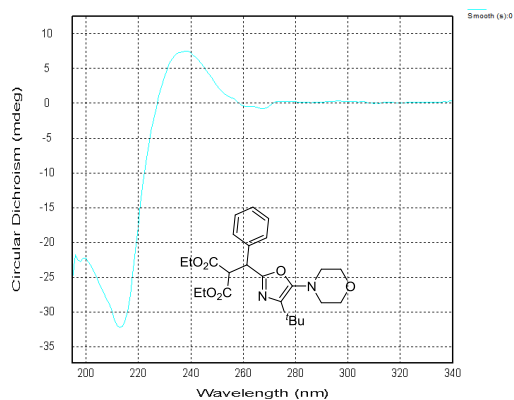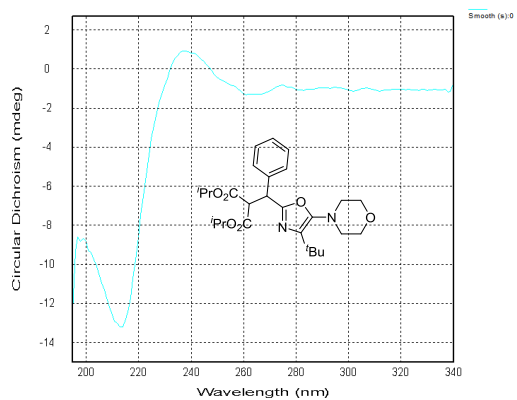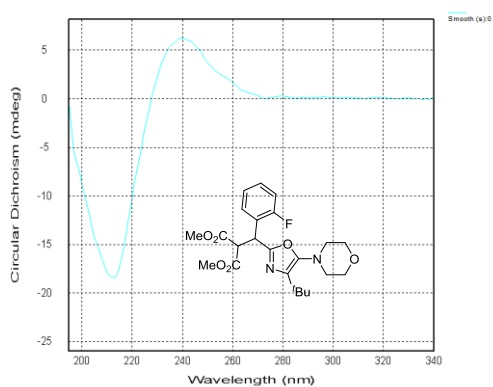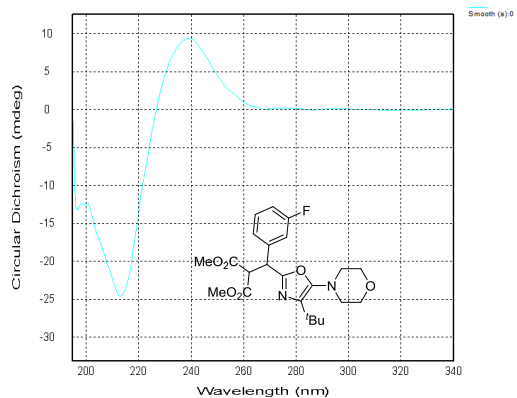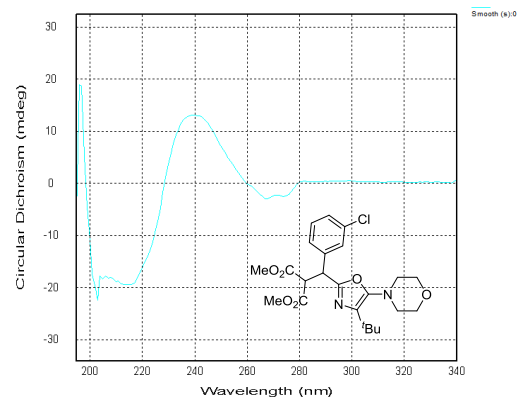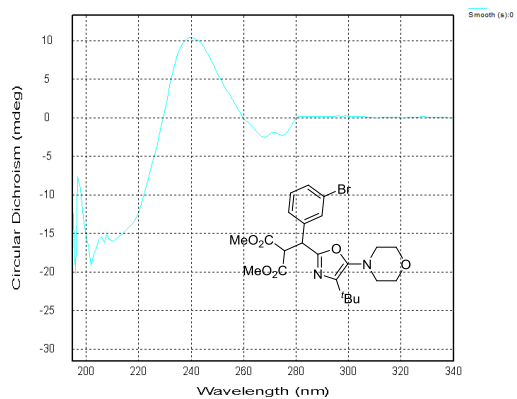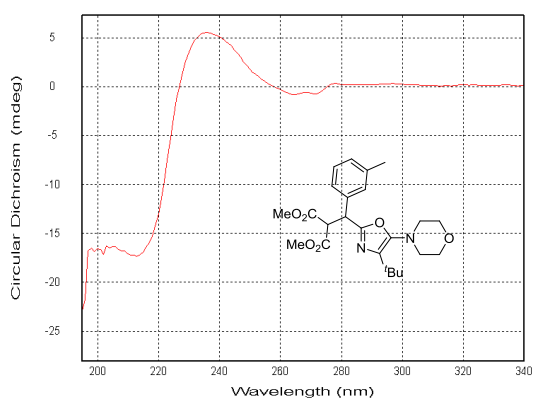

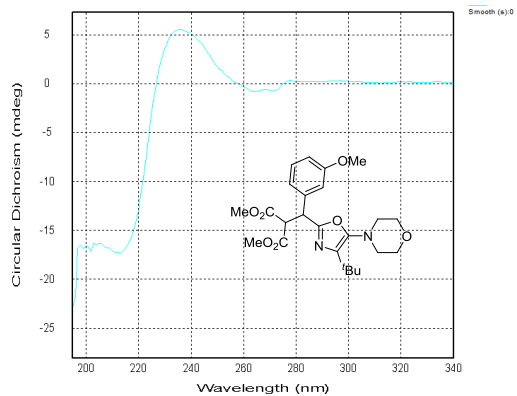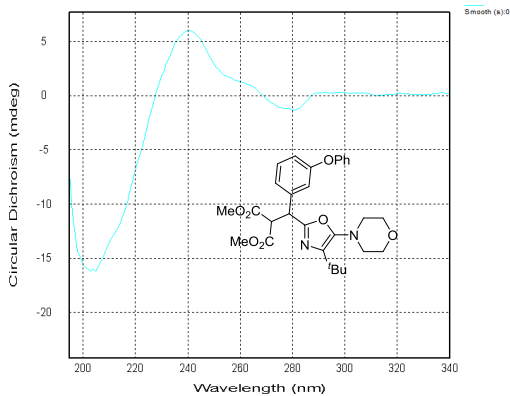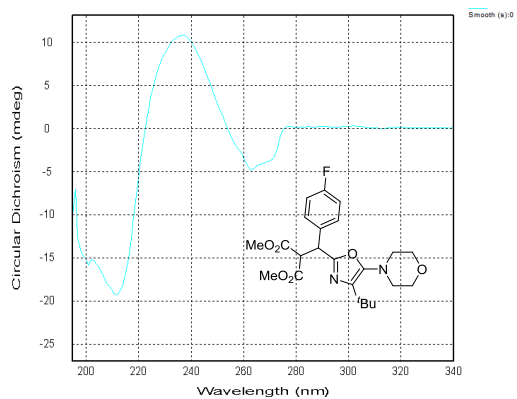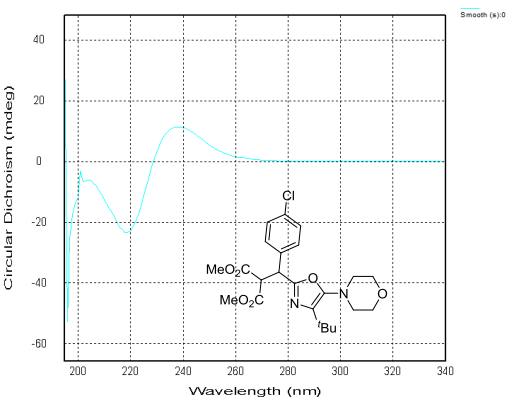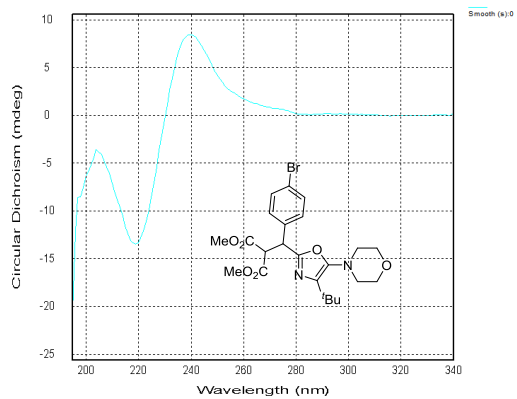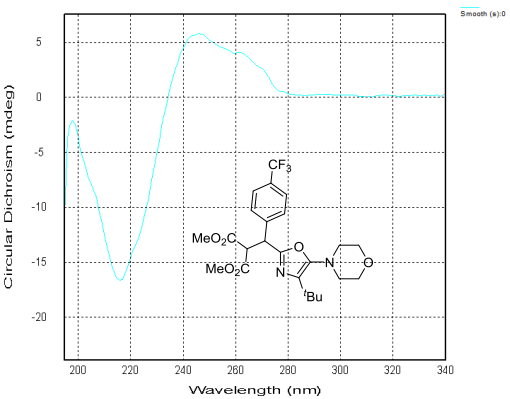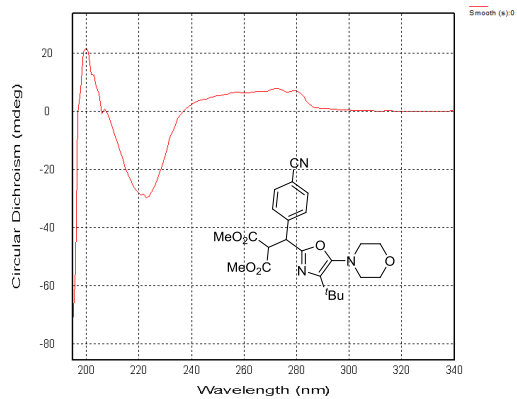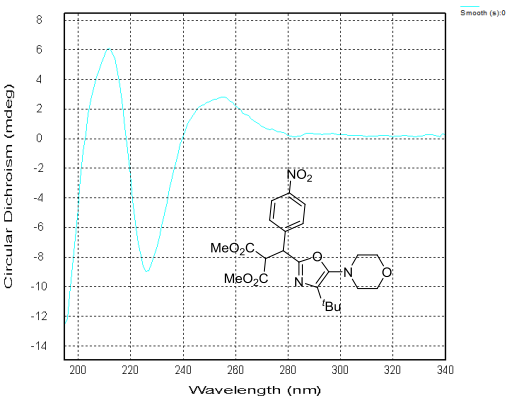

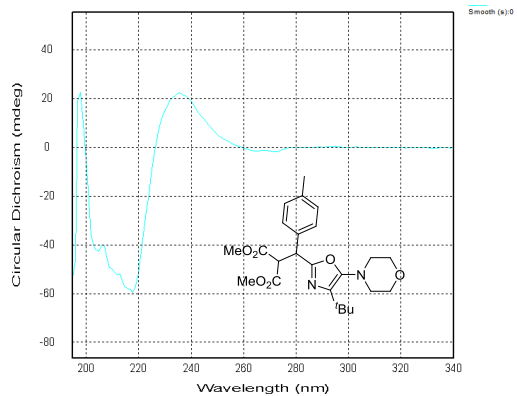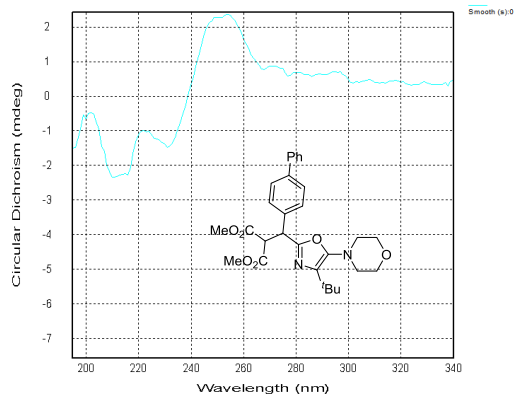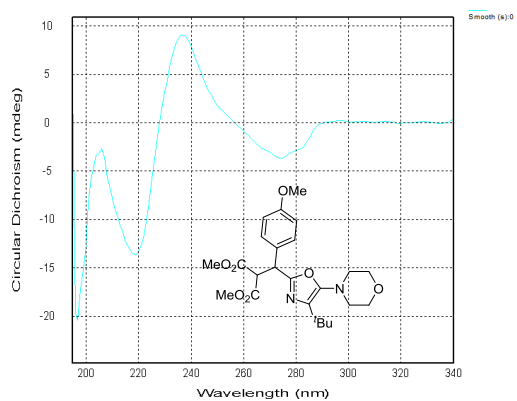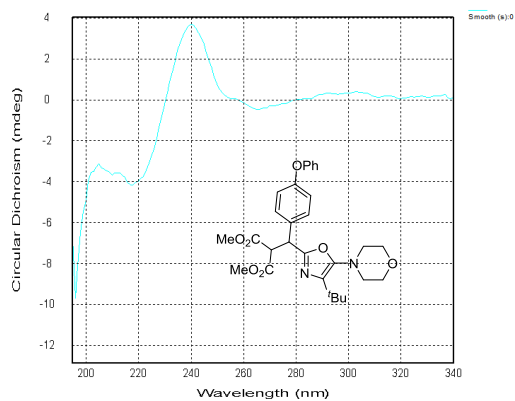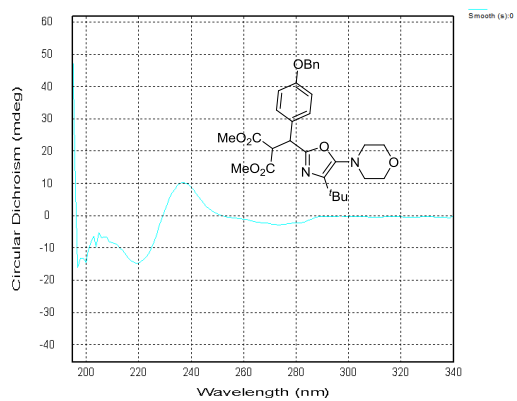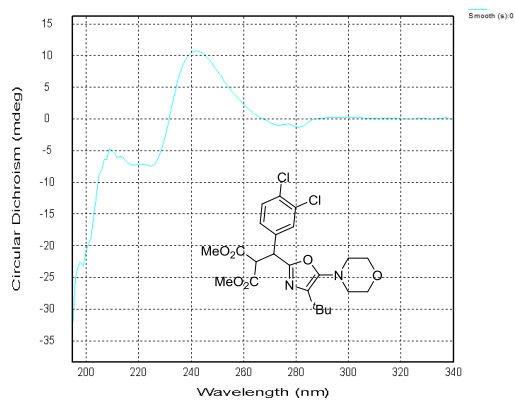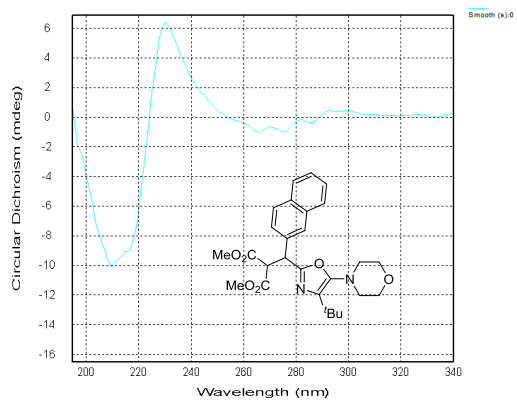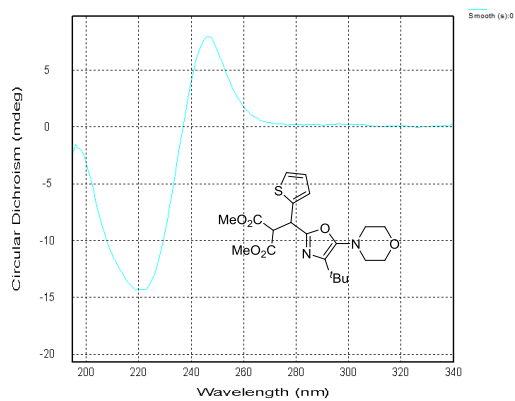

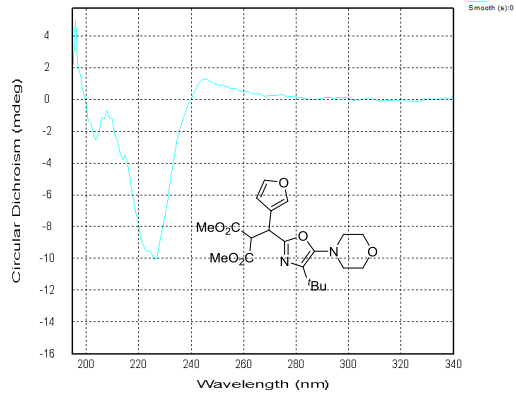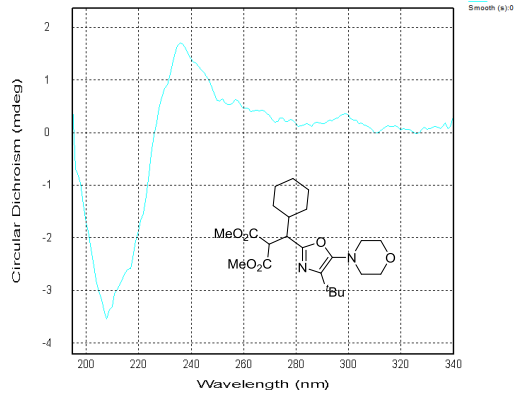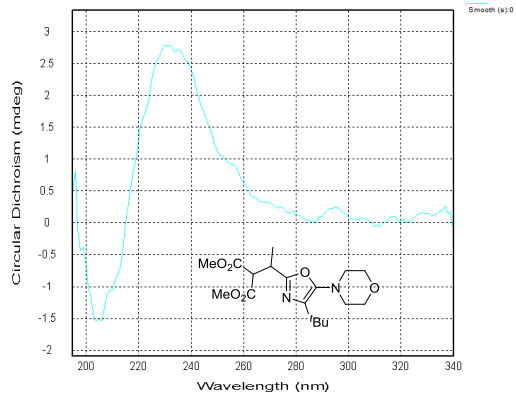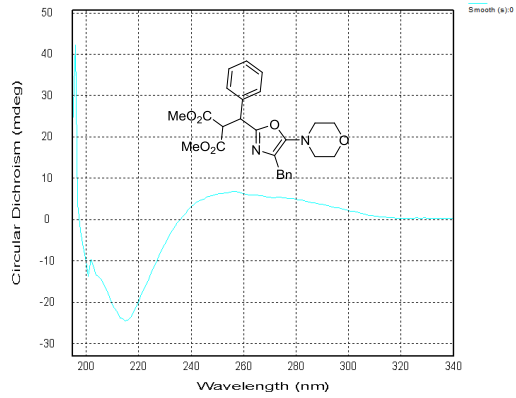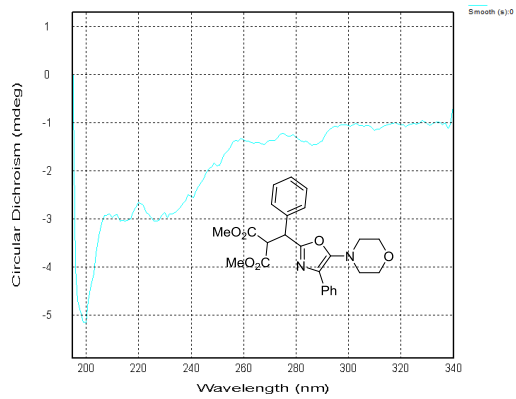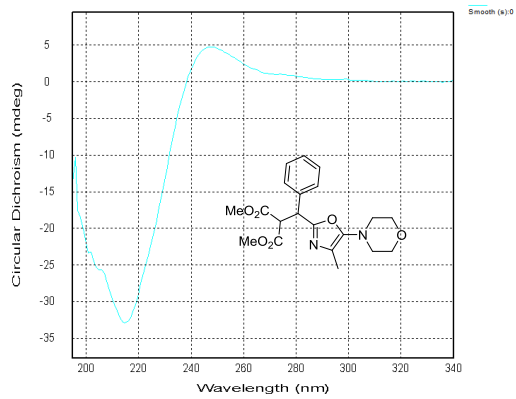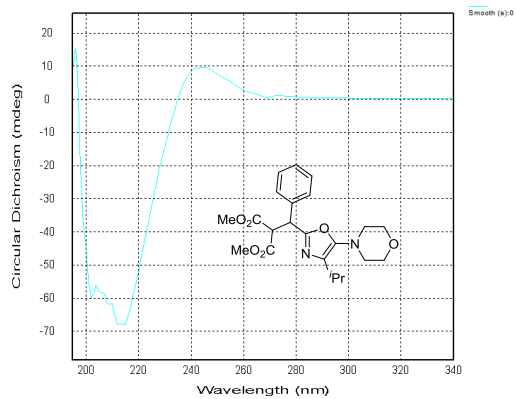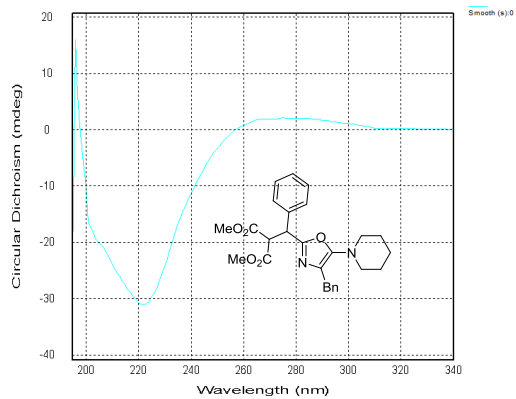

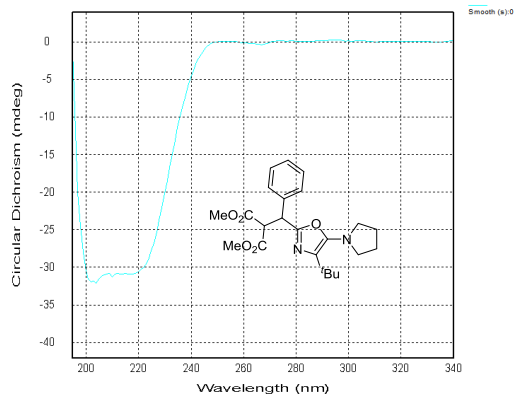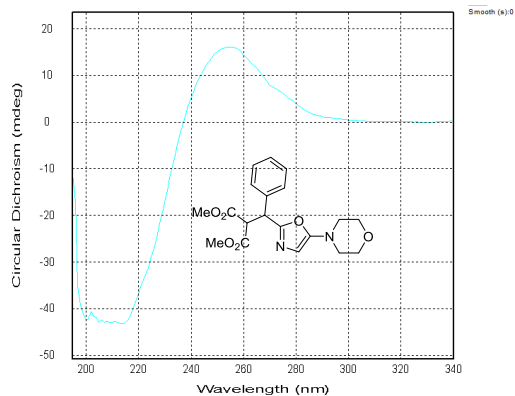

Supplement: SC-007-C6SC00689B-s001.pdf [file SC-007-C6SC00689B-s001.pdf]
